# Supplementary material for: Small molecule Hedgehog pathway antagonists
Source: Royal Society of Chemistry journal article supplement (doi:10.1039/c6ob01959e), 2017-01-01

## Small molecule inhibitors of Gli transcriptional factors of the Hedgehog Signalling Pathway

Trieu N. Trinh,<sup>a</sup> Eileen A. McLaughlin,<sup>b†</sup> Christopher P. Gordon,<sup>a§</sup> Ilana R. Bernstein,<sup>b</sup> Victoria Pye,<sup>b</sup> Kate A. Redgrove,<sup>b</sup> and Adam McCluskey<sup>a\*</sup>

<sup>a</sup> Chemistry, Priority Research Centre for Chemical Biology, University of Newcastle, University Drive Callaghan NSW 2308,

Australia. Phone: +61(2)49 216486; Fax: +61(2)49 215472; Email: [Adam.McCluskey@newcastle.edu.au](mailto:Adam.McCluskey@newcastle.edu.au)

<sup>b</sup> Biology, Priority Research Centre for Chemical Biology, University of Newcastle, University Drive Callaghan NSW 2308, Australia

<sup>§</sup> Nanoscale Organization and Dynamics Group, School of Science and Health, University of Western Sydney, Penrith South DC, NSW, Australia.

<sup>†</sup> Current Address: School of Biological Sciences, University of Auckland, Auckland, New Zealand.

Electronic Supporting Information

### Contents

#### 1. Biology

- a. Dual luciferase reporter assay results for tryptophan derivatives (Table 1)
- b. Dual luciferase reporter assay results for benzo[1,3]dioxol-5-ylmethyl-[2[(1*H*-indol-3-yl)-ethyl]-amine derivatives (Table 2).
- c. Western blotting analysis of treated and untreated TM4 cells for the presence of Gli1, Ptch1 and Sufu.
- c. HPLC analysis of D- and L- tryptophan analogues (chiral and reverse phase analysis)
- d. IC<sub>50</sub> curves for compounds **27** and **28**

#### 2. Chemistry

- a. <sup>1</sup>H NMR and <sup>13</sup>C NMR spectra of analogue **5** highlighting the presence of duplicative peaks.
- b. Variable temperature NMR experiments with analogue **5** at 30, 35, 40, 45 and 50 °C
- c. 1D selective NOSEY NMR
- d. Chiral HPLC analysis of amide rotamers analogues
- e. Synthesis of L-tryptophan analogues
- f. Synthesis of benzo[1,3]dioxol-5-ylmethyl-[2[(1*H*-indol-3-yl)-ethyl]-amine derivatives
- g. Percentage inhibition of Gli protein expression in 100 nM SAG-activated Shh LIGHT2 cells by L-Tryptophan analogues **4** and **11-17** at 10 μM compound concentration and cLogP values.
- h. Percentage inhibition of Gli expression in 100 nM SAG-activated Shh LIGHT2 cells by benzo[1,3]dioxol-5-ylmethyl-[2-(1*H*-indol-3-yl)-ethyl]-amine derivatives analogues **5** and **20-26** at 10 μM compound concentration and cLogP values.
- h. Compound characterisation, <sup>1</sup>H, <sup>13</sup>C NMR and IR spectra.

**Biology**

Dual Luciferase Reporter Assay results for Tryptophan derivatives (Table 1)

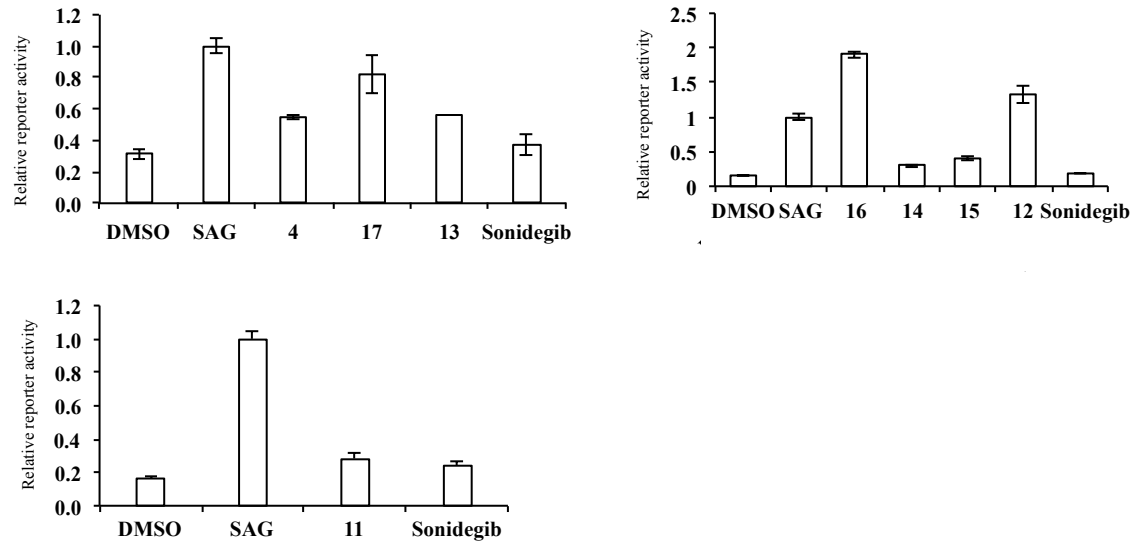

**Figure S1.** The relative total Gli protein expression in Shh LIGHT 2 cells after treatment with 100 nM SAG and subsequent treatment with 10  $\mu$ M 4, 11-17. Sonidegib at 100 nM was used as the positive control. \*  $P < 0.05$ , \*\* $P < 0.001$ , \*\*\*  $P < 0.0001$  compared to SAG treatment. All experiments were performed in triplicate.

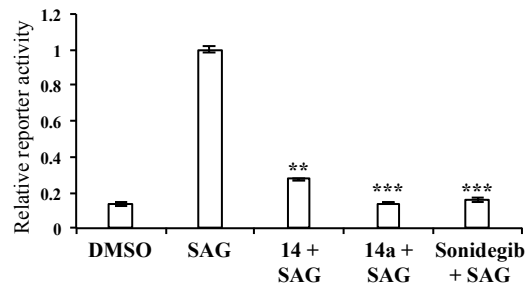

**Figure S2.** The suppression of Gli protein expression in 100nM SAG-activated Shh LIGHT2 cells by L- and D-Tryptophan analogues 14 and 14a at 10  $\mu$ M, respectively. Sonidegib (100 nM) was used as the positive control. All experiments were performed in triplicate. \*\* $P < 0.001$ , \*\*\* $P < 0.0001$  compared to SAG treatment.

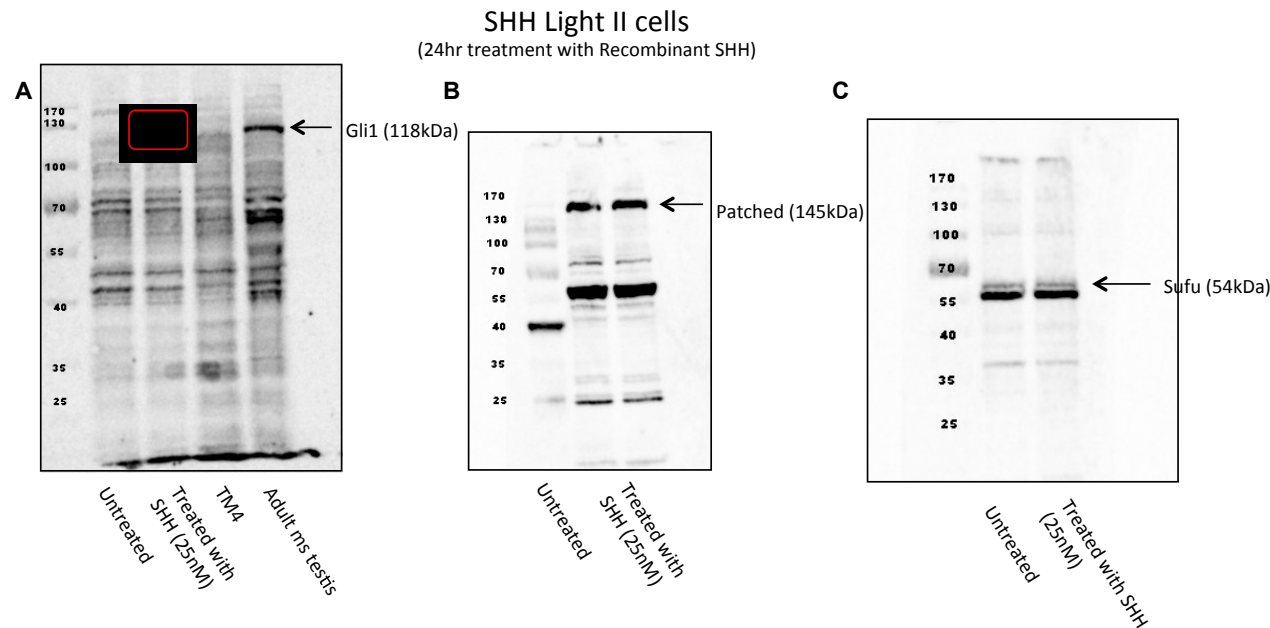

**Figure S3.** Western blotting analysis identifying the presence of Gli1 in adult mouse testes, but its absence on treatment (red box); (B) presence of Pth1 (treated and untreated); and (C) presence of Sufu (treated and untreated).

### Reverse phase and chiral separation of L- and D-Tryptophan derivatives

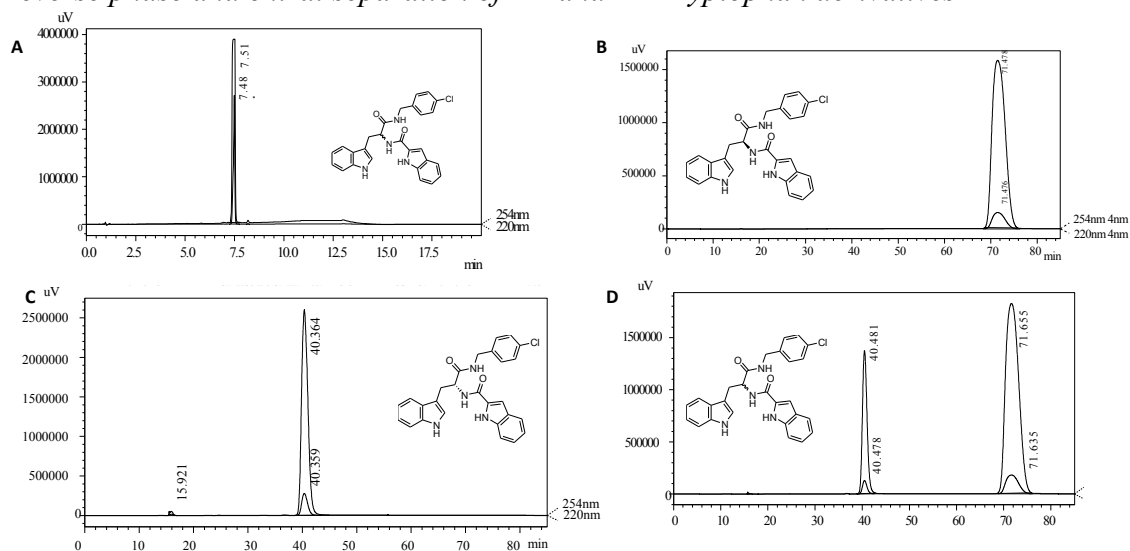

**Figure S4.** The HPLC chromatograms (A) reverse phase HPLC analysis of a mixture of **14** and **14a**; (B) chiral column HPLC analysis of **14** prepared from L-Tryptophan; (C) chiral column HPLC analysis of **14a** prepared from D-Tryptophan; (D) chiral column HPLC analysis of a mixture of **14** and **14a**.

Chemical structure of compound 10 is shown with protons labeled a through e. The  $^1\text{H}$  NMR spectrum (CDCl<sub>3</sub>) displays peaks for these protons: He (aromatic NH, ~10.8 ppm), Hd (aromatic, ~6.0 ppm), Ha (CH<sub>2</sub>, ~4.5 ppm), Hb (CH<sub>2</sub>, ~4.0 ppm), and Hc (CH<sub>2</sub>, ~3.2 ppm). Integration values are provided for each group: 1.00 for He, 14.12 for the aromatic region, 1.03 for Hd, 2.28 for Ha, 1.09 for Hb, and 3.22 for Hc. A list of chemical shifts ( $\delta$ ) is shown at the top of the spectrum.

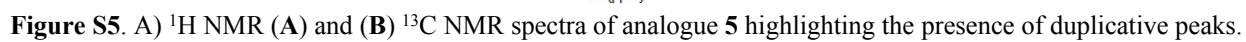

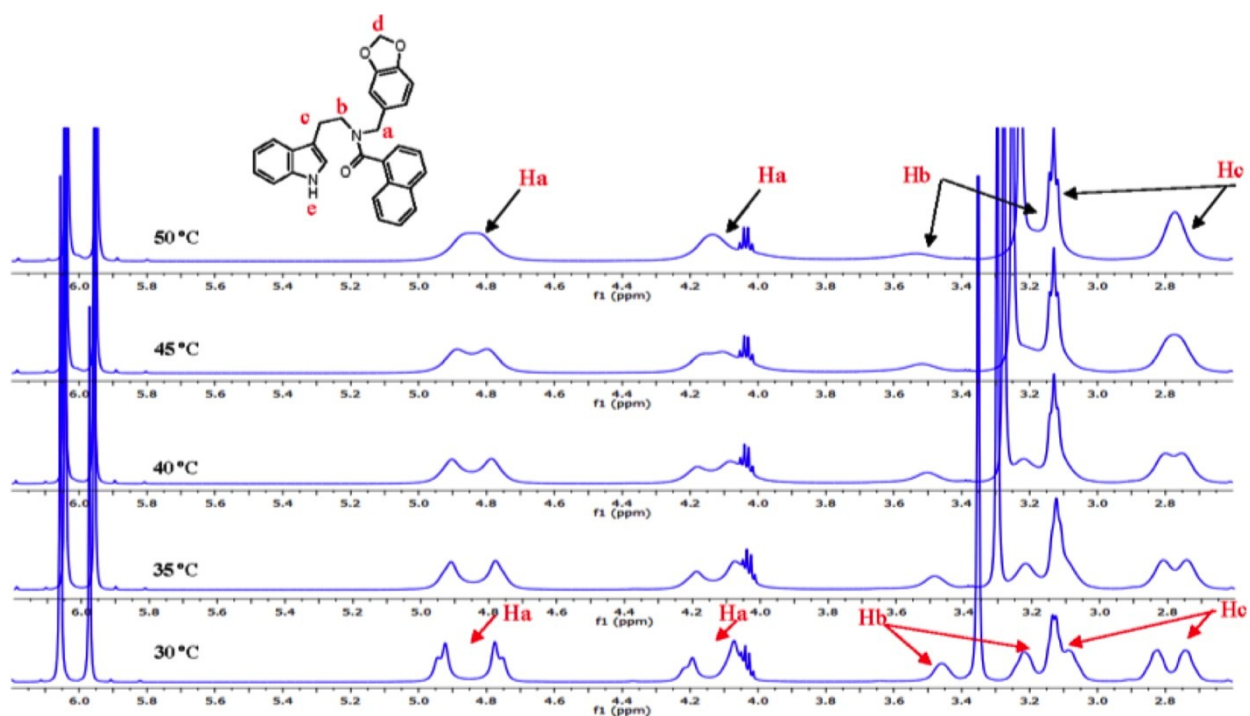

**Figure S6.** Variable-temperature NMR experiment with analogue **5** at 30, 35, 40, 45, and 50 °C. Arrows indicated the splitting (red arrows) merging into individual peaks (black arrows) when increasing the temperatures from 30 to 50 °C. Displayed is the aliphatic region of the  $^1\text{H}$  NMR in  $\text{DMSO}-d_6$ .

*1D selective NOSEY NMR Experiment*

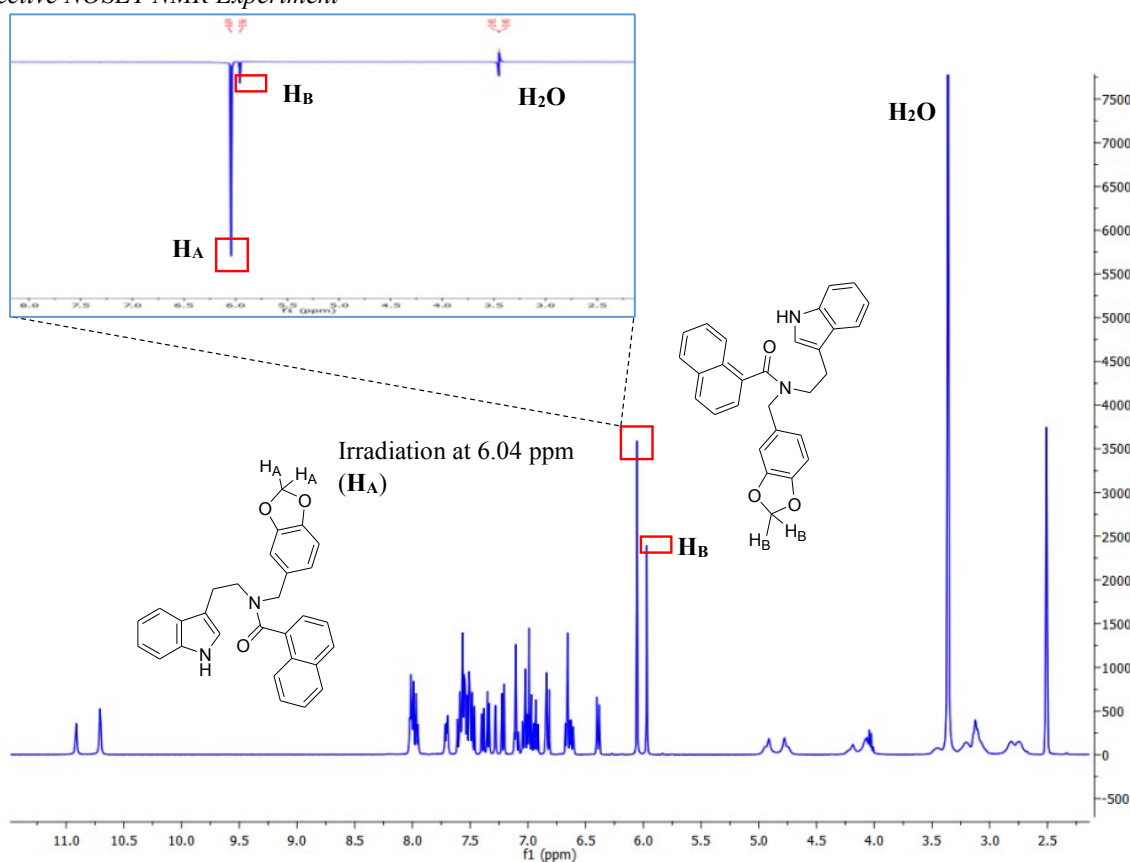

**Figure S7.** 1D selective NOSEY and  $^1\text{H}$  NMR spectra of analogue **5**. The irradiation at the peak at 6.04 ppm results in two peaks at the same phase at 6.04 and 5.96 ppm which correspond to  $\text{H}_\text{A}$  and  $\text{H}_\text{B}$ , respectively. Other peaks are not visible.

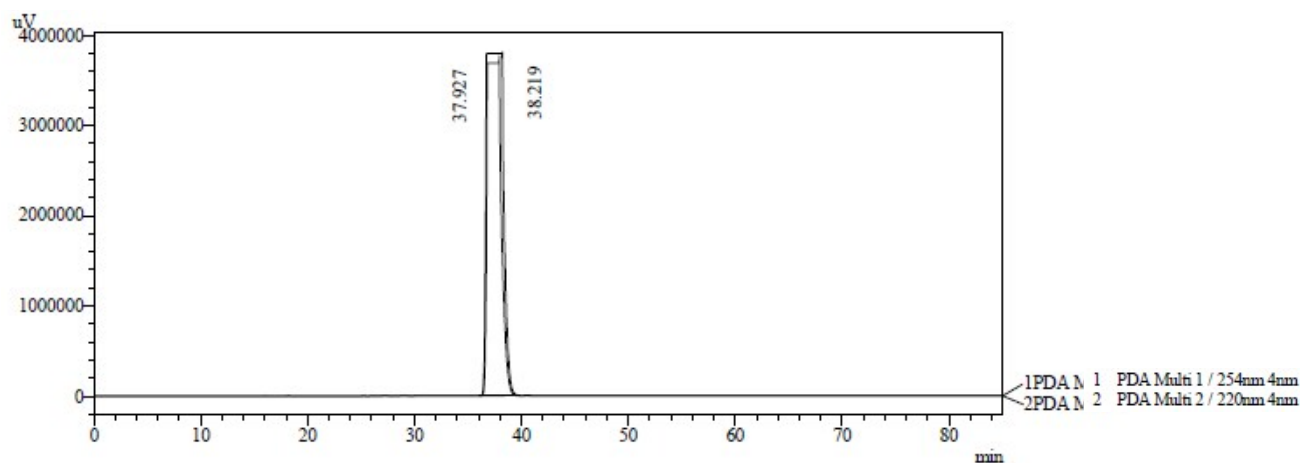

**Figure S8.** Chiral HPLC analysis of amide rotamer analogue **5**.

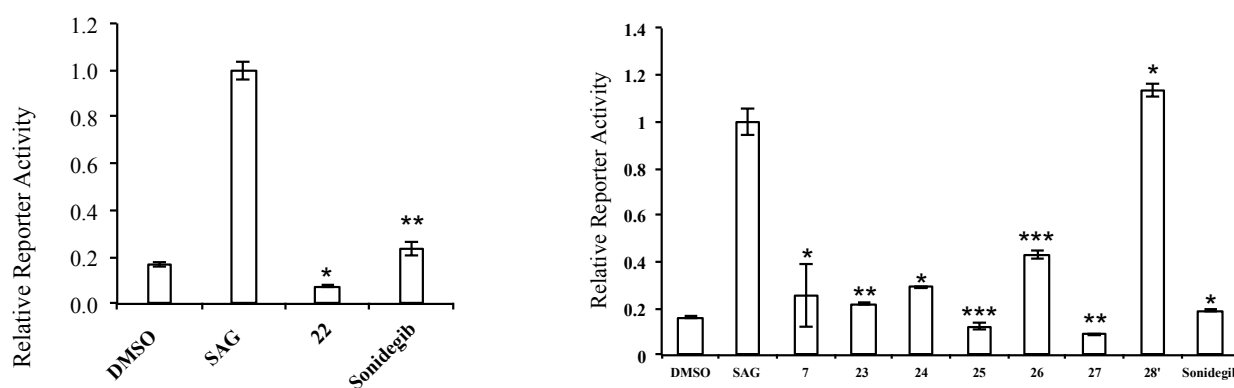

**Figure S9.** The relative total Gli protein expression in Shh LIGHT 2 cells after treatment with 100 nM SAG and subsequent treatment with 10  $\mu$ M **7** (**A**) and **23-28** (**B**). Sonidegib at 100 nM was used as the positive control. \*  $P < .05$ , \*\*  $P < .001$ , \*\*\*  $P < .0001$  compared to SAG treatment. All treatments were performed in triplicate.

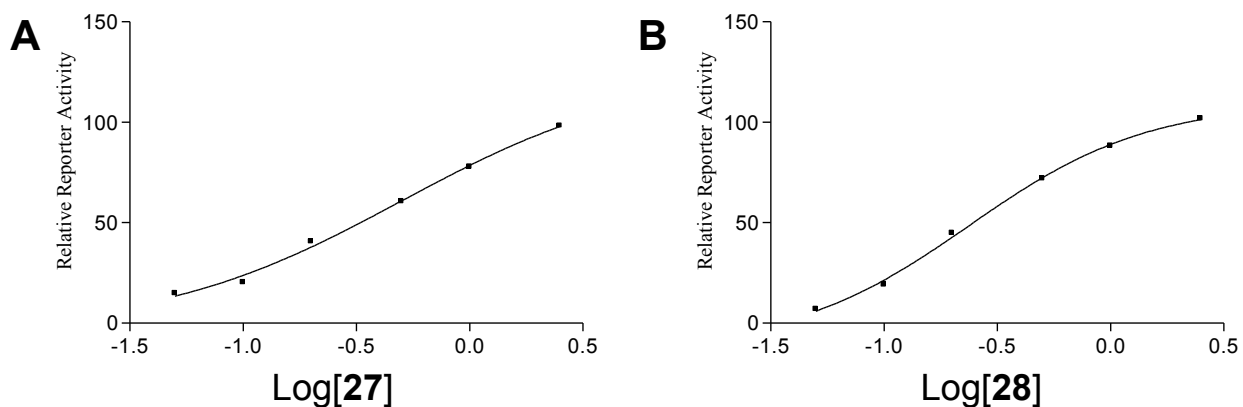

**Figure S9.** IC<sub>50</sub> curves for analogues **27** and **28**.

## Compound Characterization

### Chemistry

#### Synthesis of L-tryptophan derivatives (4, 11–17)

**Table S1.** Isolated yields,  $^1\text{H}$  NMR featuring the ABX systems and the diastereotopic protons, and base cations in HRMS  $[\text{M}+\text{H}]^+$  of L-Tryptophan derivatives (4, 11–17). *Reagents and conditions:* (i) 1.5 eq. HATU, 3eq. DIPEA (Table 1)

| <div style="text-align: center;"> </div> |   |    |           |                                                                        |                                            |                                        |                                    |
|------------------------------------------|---|----|-----------|------------------------------------------------------------------------|--------------------------------------------|----------------------------------------|------------------------------------|
| Compounds                                | R | R' | Yield (%) | $^1\text{H}$ NMR AB protons (ppm)                                      | Proton-X (ppm)                             | Diastereotopic protons (ppm)           | HRMS $[\text{M}+\text{H}]^+$ (m/z) |
| 4                                        |   |    | 18        | 3.05<br>(ddd*, $J_{AX}=22.8$ ,<br>$J_{BX}=14.4$ , $J_{AB}=7.2$ Hz, 2H) | 4.59<br>(dd, $J=14.4$ ,<br>8.1 Hz, 1H)     | 4.24<br>(qd, $J=15.6$ , 5.9<br>Hz, 2H) | 514.0850                           |
| 11                                       |   |    | 13        | 3.07<br>(ddd, $J_{AX}=22.9$ , $J_{BX}=$<br>14.4, $J_{AB}=7.2$ Hz, 2H)  | 4.63<br>(dd, $J=14.3$ ,<br>8.2 Hz, 1H)     | 4.25<br>(qd, $J=15.5$ , 5.9<br>Hz, 2H) | 514.0850                           |
| 12                                       |   |    | 22        | 3.07<br>(ddd, $J_{AX}=22.3$ , $J_{BX}=14.4$ ,<br>$J_{AB}=7.1$ Hz, 2H)  | 4.60<br>(dd, $J=14.4$ ,<br>7.9 Hz, 1H)     | 4.24<br>(qd, $J=15.5$ , 5.9<br>Hz, 2H) | 514.0850                           |
| 13                                       |   |    | 18        | 3.05<br>(ddd, $J_{AX}=22.8$ , $J_{BX}=$<br>14.4, $J_{AB}=7.3$ Hz, 2H)  | 4.59<br>(dd, $J=14.4$ ,<br>8.2 Hz, 1H)     | 4.23<br>(qd, $J=15.5$ , 5.9<br>Hz, 2H) | 480.1240                           |
| 14                                       |   |    | 28        | 3.24<br>(ddd, $J_{AX}=28.6$ , $J_{BX}=$<br>14.6, $J_{AB}=5.2$ Hz, 2H)  | 4.80<br>(dd, $J=9.2$ , 8.4,<br>5.2 Hz, 1H) | 4.31<br>(qd, $J=16.0$ , 6.0<br>Hz, 2H) | 471.1582                           |
| 15                                       |   |    | 23        | 3.23<br>(ddd, $J_{AX}=36.4$ , $J_{BX}=$<br>14.4, $J_{AB}=5.2$ Hz, 2H)  | 4.93<br>(dd, $J=9.3$ , 5.2<br>Hz, 1H)      | 4.37<br>(qd, $J=16.0$ , 6.0<br>Hz, 2H) | 482.1630                           |
| 16                                       |   |    | 25        | 3.25<br>(ddd, $J_{AX}=45$ , $J_{BX}=14.9$ ,<br>$J_{AB}=4.8$ Hz, 2H)    | 4.81<br>(dd, $J=9.3$ , 4.8<br>Hz, 1H)      | 4.37 – 4.23<br>(m, 2H)<br>overlapping  | 536.1735                           |
| 17                                       |   |    | 39        | 3.22 – 3.07 (m, 2H)<br>overlapping                                     | 4.81<br>(dd, $J=8.6$ , 6.0<br>Hz, 1H)      | 4.32<br>(qd, $J=15.4$ , 5.8<br>Hz, 2H) | 544.1610                           |

Synthesis of benzo[1,3]dioxol-5-ylmethyl-[2-(1*H*-indol-3-yl)-ethyl]-amine derivatives

**Table S2.** Isolated yields, and base cations in HRMS [M+H]<sup>+</sup> of benzo[1,3]dioxol-5-ylmethyl-[2-(1*H*-indol-3-yl)-ethyl]-amine derivatives **5**, **20-29**.

| <div style="text-align: center;"> 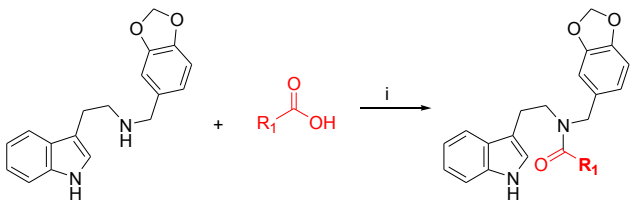 </div> |                                                                                     |                     |                                                   |
|-----------------------------------------------------------------------------------------------------------------------------|-------------------------------------------------------------------------------------|---------------------|---------------------------------------------------|
| Compounds                                                                                                                   | R                                                                                   | Isolated yields (%) | HRMS (ES <sup>+</sup> )<br>m/z [M+H] <sup>+</sup> |
| <b>5</b>                                                                                                                    | 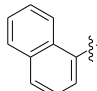   | 67                  | 449.1859                                          |
| <b>20</b>                                                                                                                   | 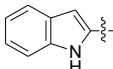   | 67                  | 439.1811                                          |
| <b>21</b>                                                                                                                   | 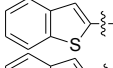   | 53                  | 455.1423                                          |
| <b>22</b>                                                                                                                   | 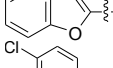   | 63                  | 439.1652                                          |
| <b>23</b>                                                                                                                   | 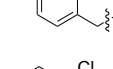   | 58                  | 447.1647                                          |
| <b>24</b>                                                                                                                   | 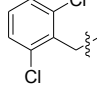  | 56                  | 447.1467                                          |
| <b>25</b>                                                                                                                   | 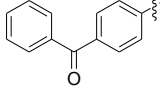 | 40                  | 503.1964                                          |
| <b>26</b>                                                                                                                   | 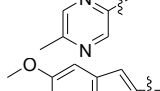 | 22                  | 415.1761                                          |
| <b>27</b>                                                                                                                   | 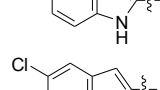 | 62                  | 468.1919                                          |
| <b>28</b>                                                                                                                   | 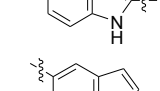 | 64                  | 472.1422                                          |
| <b>29</b>                                                                                                                   | 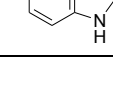 | 67                  | 438.1812                                          |

**Table S3.** Percentage inhibition of Gli protein expression in 100 nM SAG-activated Shh LIGHT2 cells by L-Tryptophan analogues **4** and **11-17** at 10  $\mu$ M compound concentration and cLogP values.

| 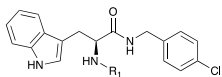              |                             |       |                                                                                                                         |                             |       |
|------------------------------------------------------------------------------------------------|-----------------------------|-------|-------------------------------------------------------------------------------------------------------------------------|-----------------------------|-------|
| R <sub>1</sub>                                                                                 | Inhibition (%) <sup>a</sup> | cLogP | R <sub>1</sub>                                                                                                          | Inhibition (%) <sup>a</sup> | cLogP |
| 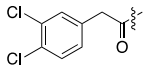<br><b>4</b>  | 66                          | 4.84  | 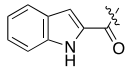<br><b>14</b> [ <b>14a</b> ; D-isomer] | 86 [99]                     | 2.72  |
| 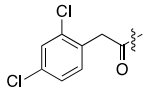<br><b>11</b> | 83                          | 4.84  | 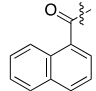<br><b>15</b>                          | 71                          | 4.77  |
| 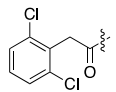<br><b>12</b> | -38                         | 4.84  | 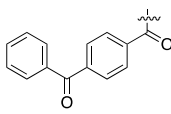<br><b>16</b>                          | -105                        | 4.99  |
| 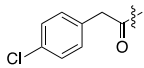<br><b>13</b> | 64                          | 4.28  | 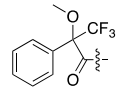<br><b>17</b>                          | 26                          | 4.46  |

<sup>a</sup> Inhibition calculated as Gli signal (SAG) – Gli Signal (SAG+Compound).

**Table S4.** Percentage inhibition of Gli expression in 100 nM SAG-activated Shh LIGHT2 cells by benzo[1,3]dioxol-5-ylmethyl-[2-(1*H*-indol-3-yl)-ethyl]-amine derivatives analogues **5** and **20-26** at 10  $\mu$ M compound concentration and cLogP values.

| 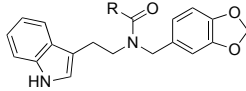              |                             |       |                                                                                                  |                             |       |
|--------------------------------------------------------------------------------------------------|-----------------------------|-------|--------------------------------------------------------------------------------------------------|-----------------------------|-------|
| R <sub>1</sub>                                                                                   | Inhibition (%) <sup>a</sup> | cLogP | R <sub>1</sub>                                                                                   | Inhibition (%) <sup>a</sup> | cLogP |
| 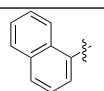<br><b>5</b>  | 89                          | 5.23  | 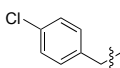<br><b>23</b> | 102                         | 4.73  |
| 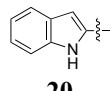<br><b>20</b> | 111                         | 3.18  | 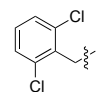<br><b>24</b> | 67                          | 5.29  |
| 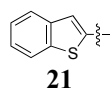<br><b>21</b> | 92                          | 4.12  | 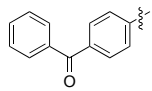<br><b>25</b> | 108                         | 5.44  |
| 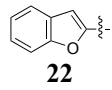<br><b>22</b> | 84                          | 3.55  | 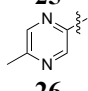<br><b>26</b> | -16                         | 2.68  |

**Table S3.** Percentage inhibition of Gli protein expression in 100 nM SAG-activated Shh LIGHT2 cells by L-Tryptophan analogues **4** and **11-17** at 10  $\mu$ M compound concentration.

|               |                             |       |                                                                                                                         |                             |       |
|------------------------------------------------------------------------------------------------|-----------------------------|-------|-------------------------------------------------------------------------------------------------------------------------|-----------------------------|-------|
| R <sub>1</sub>                                                                                 | Inhibition (%) <sup>a</sup> | cLogP | R <sub>1</sub>                                                                                                          | Inhibition (%) <sup>a</sup> | cLogP |
| <br><b>4</b>  | 66                          | 4.84  | <br><b>14</b> [ <b>14a</b> ; D-isomer] | 86 [99]                     | 2.72  |
| 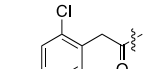<br><b>11</b> | 83                          | 4.84  | 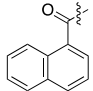<br><b>15</b>                          | 71                          | 4.77  |
| <br><b>12</b> | -38                         | 4.84  | 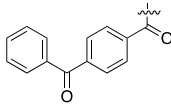<br><b>16</b>                          | -105                        | 4.99  |
| <br><b>13</b> | 64                          | 4.28  | <br><b>17</b>                          | 26                          | 4.46  |

<sup>a</sup> Inhibition calculated as Gli signal (SAG) – Gli Signal (SAG+Compound).

**Table S4.** Percentage inhibition of Gli expression in 100 nM SAG-activated Shh LIGHT2 cells by benzo[1,3]dioxol-5-ylmethyl-[2-(1*H*-indol-3-yl)-ethyl]-amine derivatives analogues **5** and **20-26** at 10  $\mu$ M compound concentration.

| 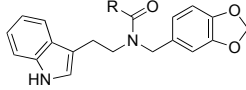              |                             |       |                                                                                                  |                             |       |
|--------------------------------------------------------------------------------------------------|-----------------------------|-------|--------------------------------------------------------------------------------------------------|-----------------------------|-------|
| R <sub>1</sub>                                                                                   | Inhibition (%) <sup>a</sup> | cLogP | R <sub>1</sub>                                                                                   | Inhibition (%) <sup>a</sup> | cLogP |
| 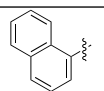<br><b>5</b>  | 89                          | 5.23  | 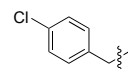<br><b>23</b> | 102                         | 4.73  |
| 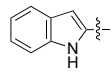<br><b>20</b> | 111                         | 3.18  | 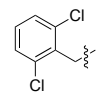<br><b>24</b> | 67                          | 5.29  |
| 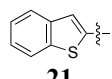<br><b>21</b> | 92                          | 4.12  | 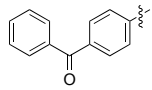<br><b>25</b> | 108                         | 5.44  |
| 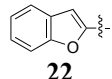<br><b>22</b> | 84                          | 3.55  | 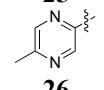<br><b>26</b> | -16                         | 2.68  |

**Table S5.** Primer sequences used in qPCR assay.

| <b>Human gene</b> |                                 |                                 |                            |
|-------------------|---------------------------------|---------------------------------|----------------------------|
|                   | <b>Forward Sequence (5'-3')</b> | <b>Reverse Sequence (5'-3')</b> | <b>Annealing Temp (°C)</b> |
| Gli <sub>2</sub>  | ATCTCTTGCCACCATTCCAT            | GGACAGAATGAGGCTCGTAA            | 60                         |
| Smo               | CTGCCACTTCTACGACTTCT            | GGCCTGACATAGCACATAGT            | 56                         |
| SuFu              | GACCCCTTGGAATATGTTAG            | CTGATGTAGTGCCAGTGCTC            | 55                         |
| Ptch <sub>1</sub> | CCCTCACGTCCATCAGCAAT            | AACACCACTACTACCGCTGC            | 58                         |
| <b>Mouse gene</b> |                                 |                                 |                            |
| Gli <sub>2</sub>  | TCCAGTCAATGGTTCTGTCC            | TGGCTCAGCATCGTCACTTC            | 60                         |
| Gli <sub>3</sub>  | GGCCGTTACCATTATGATCC            | CTGAGGCTGCAGTGGGATTA            | 60                         |
| Shh               | TGCTTTGTAACCGCCACTTT            | CGCTGCTAGGTGCACTTTTA            | 61                         |
| Smo               | GAAGTCCAATCGCTACCCCTG           | ATCTGCTCGGCAAACAATCT            | 60                         |
| SuFu              | GACCCCTTGGAATATGTTAG            | CTGATGTAGTGCCAGTGCTC            | 55                         |
| Ptch <sub>1</sub> | CATAGCTGCCAGTTCAAGT             | GGTCGTAAAGTAGGTGCTGG            | 55                         |

*N*-(4-Chlorobenzyl)-2-[2-(3,4-dichlorophenyl)-acetylamino]-3-(1*H*-indol-3-yl)-propionamide (**4**)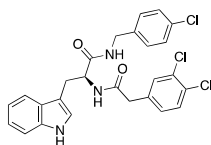

Yield: 182 mg, 35%. MP 208 – 209 °C;

IR:  $\nu_{\text{max}}$ /cm<sup>-1</sup> 3410 (NH), 3277 (NH), 3068 (CH), 1636 (CON);

<sup>1</sup>H NMR (400 MHz, DMSO-*d*<sub>6</sub>)  $\delta$  10.84 (s, 1H), 8.56 (t, *J* = 5.9 Hz, 1H), 8.43 (d, *J* = 8.1 Hz, 1H), 7.60 (d, *J* = 7.9 Hz, 1H), 7.47 (d, *J* = 8.2 Hz, 1H), 7.42 (d, *J* = 1.8 Hz, 1H), 7.35 (d, *J* = 8.1 Hz, 1H), 7.28 (d, *J* = 8.4 Hz, 2H), 7.16 – 7.02 (m, 5H), 6.97 (t, *J* = 7.1 Hz, 1H), 4.59 (dd, *J* = 14.4, 8.1 Hz, 1H), 4.24 (qd, *J* = 15.6, 5.9 Hz, 2H), 3.47 (s, 2H), 3.05 (ddd, *J*<sub>AX</sub> = 22.8, *J*<sub>BX</sub> = 14.4, *J*<sub>AB</sub> = 7.2 Hz, 2H);

<sup>13</sup>C NMR (101 MHz, DMSO-*d*<sub>6</sub>)  $\delta$  171.9, 169.6, 138.7, 138.0, 136.6, 131.6, 131.5, 131.0, 130.6, 129.8, 129.4, 129.2 (Cx2), 128.5 (Cx2), 127.7, 124.2, 121.4, 119.0, 118.7, 111.8, 110.4, 54.2, 41.8, 41.2, 28.5;

RP-HPLC Alltima™ C18 5  $\mu$ m 150  $\mu$ m x 4.6 mm, 10–100% B in 15 min, *R*<sub>t</sub> = 14.31 min, 100%;LRMS (ESI<sup>+</sup>) *m/z*: 513, 514 [M+H]<sup>+</sup>, 95%. HRMS (ES<sup>+</sup>) for C<sub>26</sub>H<sub>22</sub>Cl<sub>3</sub>N<sub>3</sub>O<sub>2</sub>, calculated 514.0850, found 514.08498.

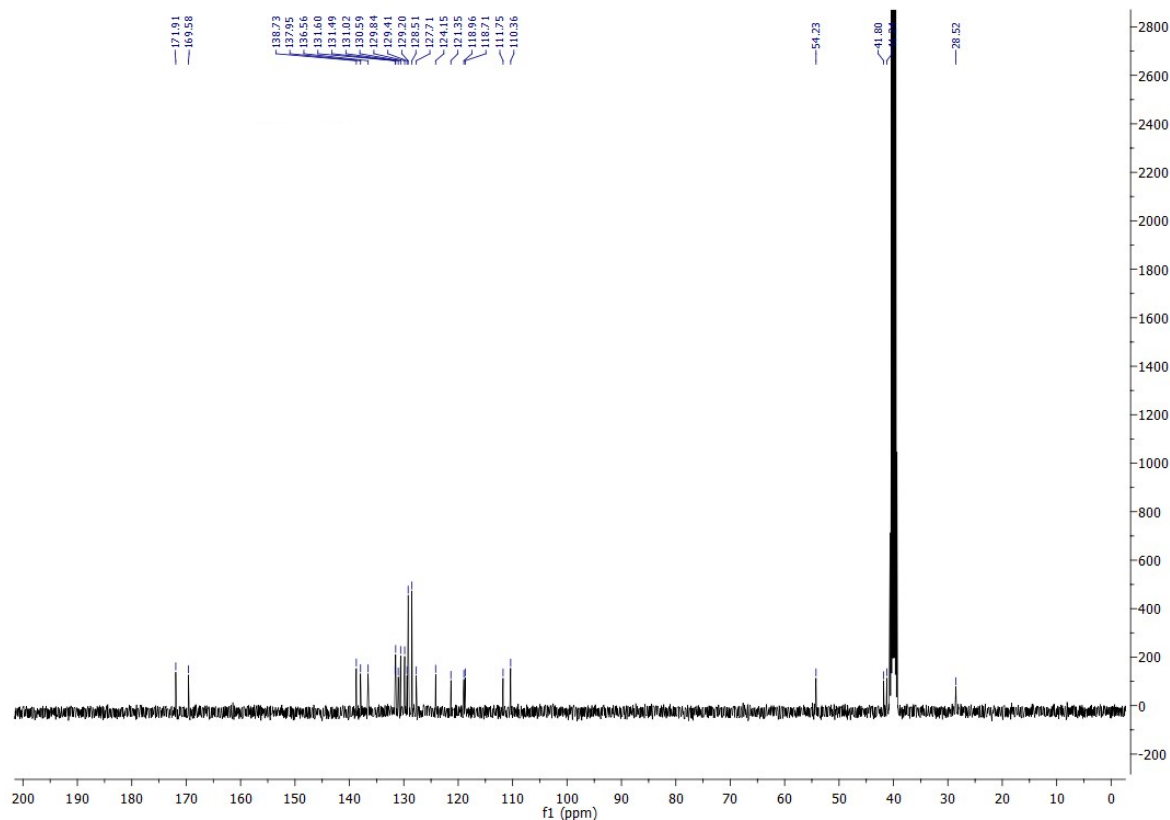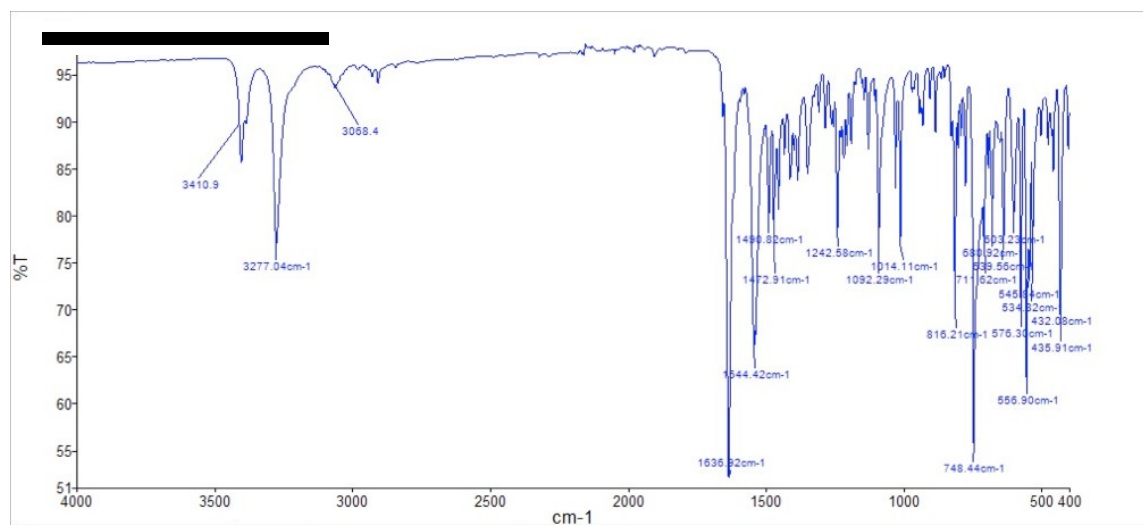

*N*-(4-Chlorobenzyl)-2-[2-(2,4-dichlorophenyl)-acetyl-amino]-3-(1*H*-indol-3-yl)-propionamide (**11**)

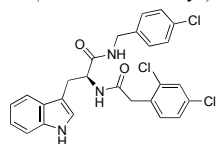

Yield: 55 mg, 24%. MP 207-208 °C;

IR:  $\nu_{\text{max}}/\text{cm}^{-1}$  3410 (NH), 3280 (NH), 3065 (CH), 1642 (CON);

$^1\text{H}$  NMR (400 MHz, DMSO- $d_6$ )  $\delta$  10.85 (s, 1H), 8.54 (t,  $J = 5.9$  Hz, 1H), 8.40 (d,  $J = 8$  1H), 7.62 (d,  $J = 7.8$  Hz, 1H), 7.53 (d,  $J = 2.1$  Hz, 1H), 7.36 (d,  $J = 8.1$  Hz, 1H), 7.33 – 7.2 3H), 7.12 (ddd,  $J = 22.2, 12.5, 7.8$  Hz, 5H), 6.98 (t,  $J = 7.4$  Hz, 1H), 4.63 (dd,  $J = 14.3, 8$  1H), 4.25 (qd,  $J = 15.5, 5.9$  Hz, 2H), 3.60 (s, 2H), 3.07 (ddd,  $J_{AX} = 22.9, J_{BX} = 14.4, J_{AB} = 7.2$  Hz, 2H);

$^{13}\text{C}$  NMR (101 MHz, DMSO- $d_6$ )  $\delta$  171.9, 168.9, 138.8, 136.6, 135.0, 133.9, 133.3, 132.3, 131.6, 129.3 (Cx2), 128.5 (Cx2) 127.7, 127.4, 124.2, 121.3, 119.0, 118.7, 111.7, 110.4, 54.2, 41.8, 31.0, 28.5;

RP-HPLC Alltima™ C18 5  $\mu\text{m}$  150 mm x 4.6 mm, 10–100% B in 15 min,  $R_t = 14.38$  min, 99.2%;

LRMS (APCI $^+$ )  $m/z$  513, 514  $[\text{M}+1\text{H}]^+$  50%. HRMS (ES $^+$ ) for  $\text{C}_{26}\text{H}_{22}\text{Cl}_3\text{N}_3\text{O}_2$ , calculated 514.0850, 514.0850.

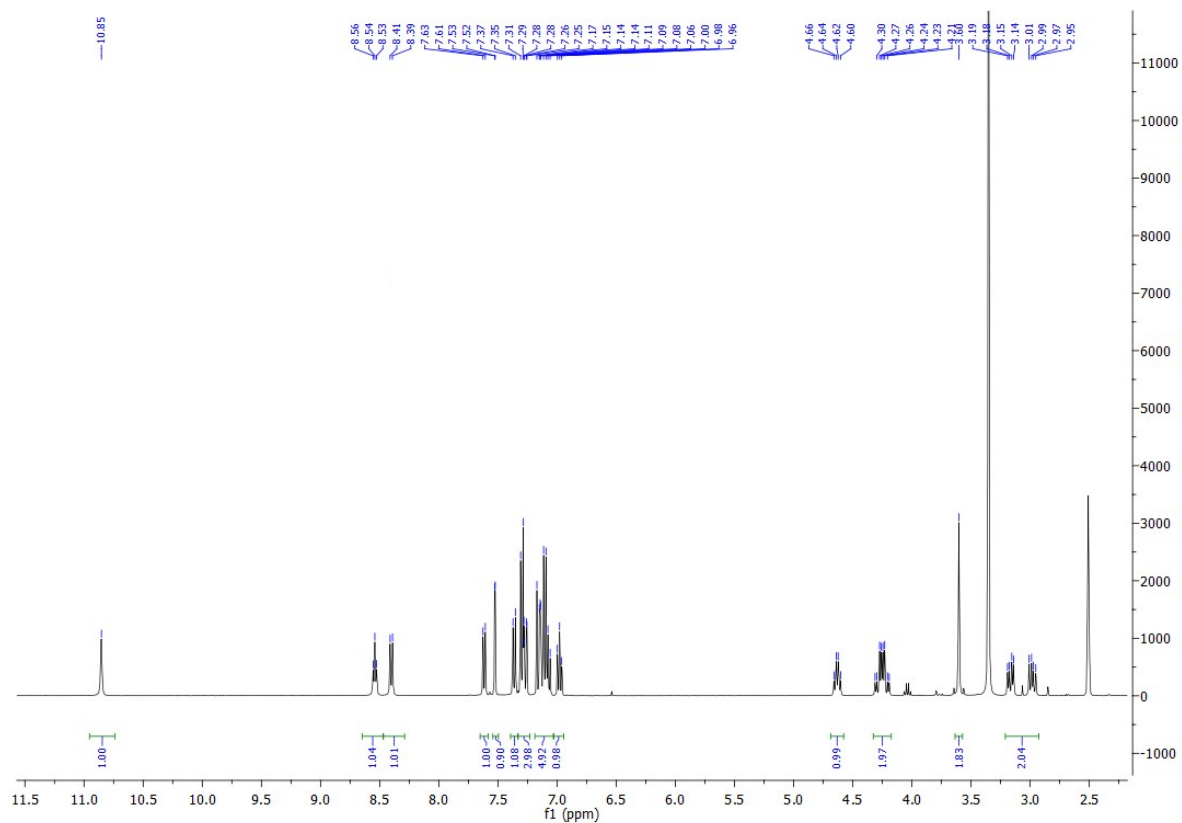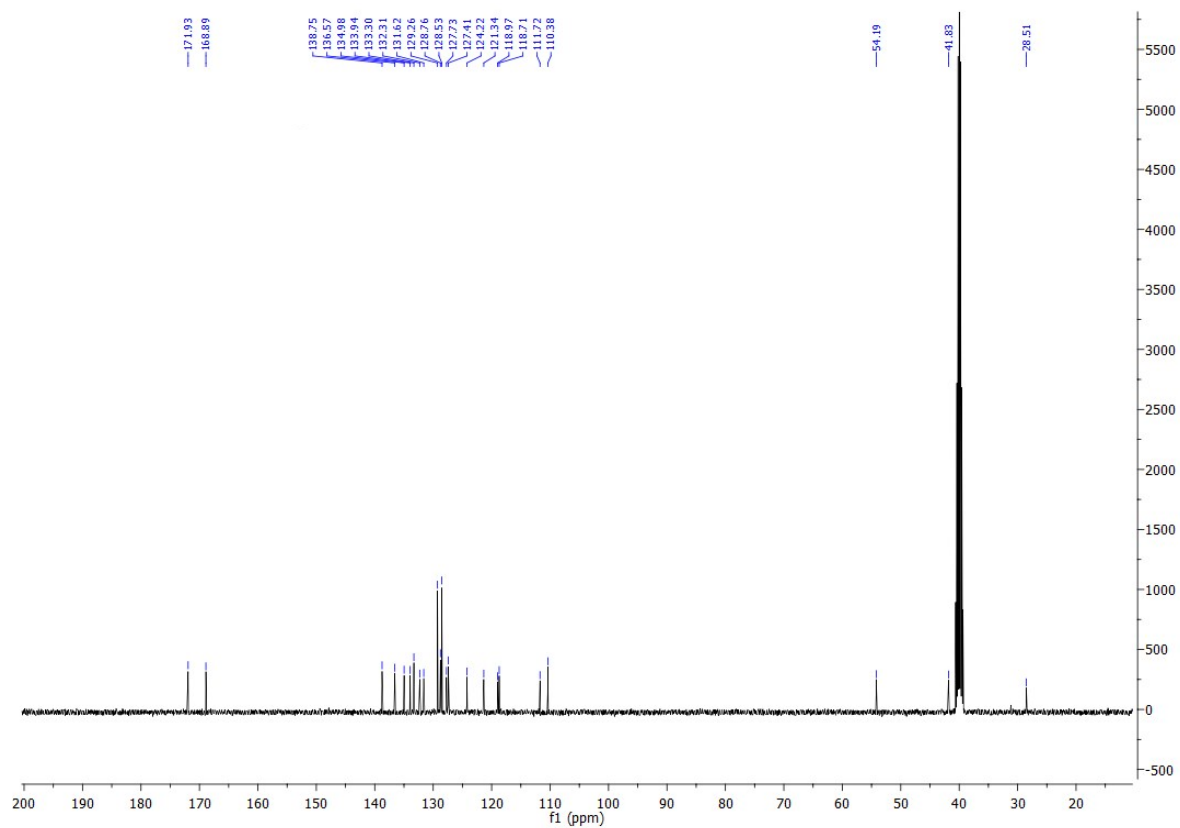

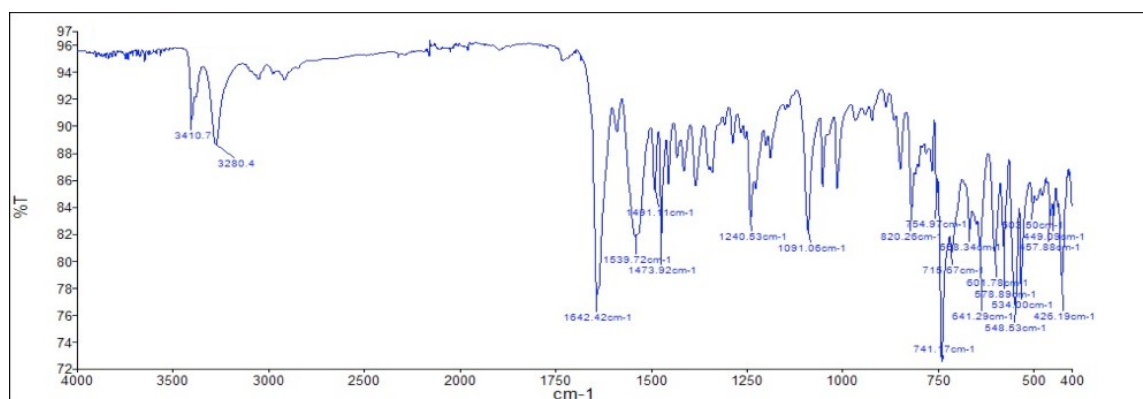

*N*-(4-Chlorobenzyl)-2-[2-(2,6-dichlorophenyl)-acetyl-amino]-3-(1*H*-indol-3-yl)-propionamide (**14**)

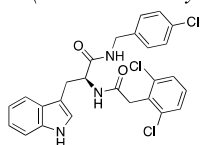

Yield: 80 mg, 40%. MP 265-256 °C;

IR:  $\nu_{\text{max}}/\text{cm}^{-1}$  3410 (NH), 3292 (NH), 3252 (NH), 1641 (CON);

$^1\text{H}$  NMR (400 MHz, DMSO- $d_6$ )  $\delta$  10.85 (s, 1H), 8.49 (t,  $J$  = 6.0 Hz, 1H), 8.40 (d,  $J$  = 8.2 Hz, 1H), 7.60 (d,  $J$  = 7.9 Hz, 1H), 7.41 (d,  $J$  = 7.9 Hz, 2H), 7.34 (d,  $J$  = 8.1 Hz, 1H), 7.28 (ddd,  $J$  = 8.6, 4.7, 2.5 Hz, 3H), 7.13 (d,  $J$  = 2.2 Hz, 1H), 7.11 – 7.03 (m, 3H), 7.00 – 6.94 (m, 1H), 4.60 (dd,  $J$  = 14.4, 7.9 Hz, 1H), 4.24 (qd,  $J$  = 15.5, 5.9 Hz, 2H), 3.84 (q,  $J$  = 16.3 Hz, 2H), 3.07 (ddd,  $J_{AX}$  = 22.3,  $J_{BX}$  = 14.4,  $J_A$  = 7.1 Hz, 2H);

$^{13}\text{C}$  NMR (101 MHz, DMSO- $d_6$ )  $\delta$  171.9, 167.8, 138.7, 136.5, 136.0 (Cx2), 133.1, 131.6, 129.6, 129.2 (Cx2), 128.5 (Cx2), 128.5 (Cx2), 127.8, 124.1, 121.3, 118.9, 118.7, 111.7, 110.4, 54.3, 41.8, 37.9, 28.6;

RP-HPLC Alltima™ C18 5  $\mu\text{m}$  150 mm x 4.6 mm, 10–100% B in 15 min,  $R_t$  = 6.54 min, 100%;

LRMS (ESI+)  $m/z$  513, 514  $[\text{M}+\text{H}]^+$  95%. HRMS ( $\text{ES}^+$ ) for  $\text{C}_{26}\text{H}_{22}\text{Cl}_3\text{N}_3\text{O}_2$ , calculated 514.0850, found 514.08496.

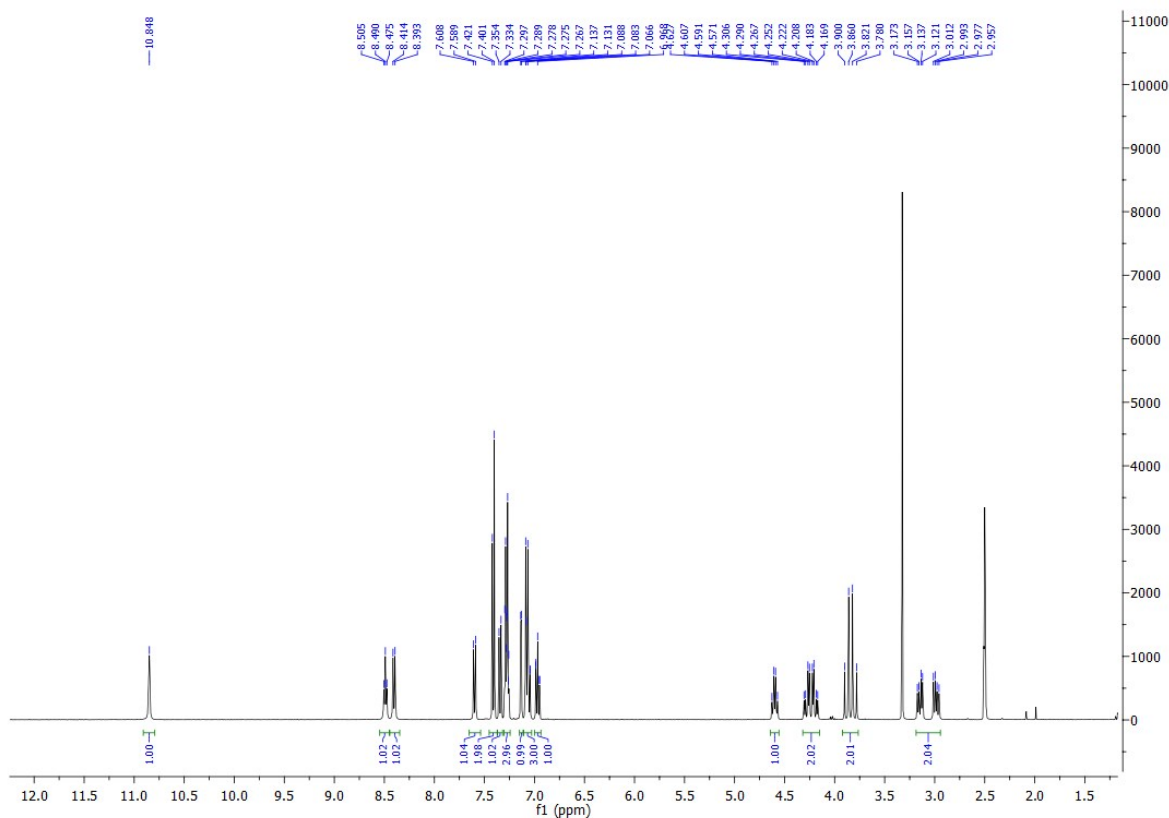

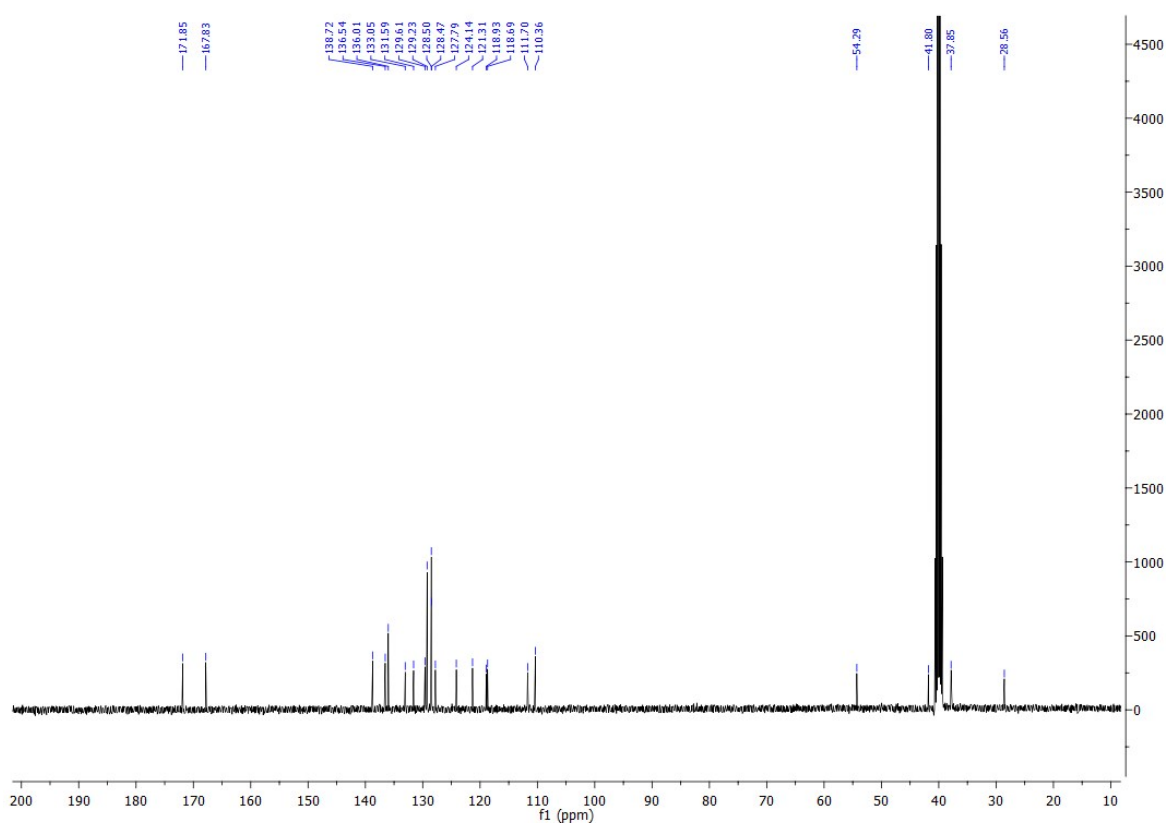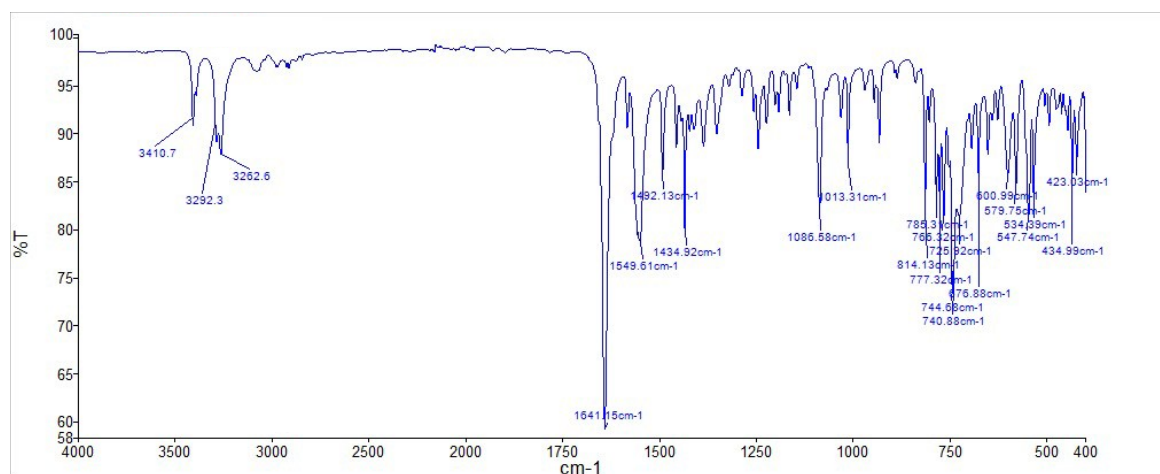

*N*-(4-Chlorobenzyl)-2-[2-(4-chlorophenyl)-acetylamino]-3-(1*H*-indol-3-yl)-propionamide (**13**)

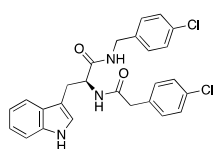

Yield: 60 mg, 32%. MP 205.2-206.3 °C;

IR:  $\nu_{\text{max}}/\text{cm}^{-1}$  3410 (NH), 3292 (NH), 3061 (CH), 1635 (CON);

$^1\text{H}$  NMR (400 MHz, DMSO- $d_6$ )  $\delta$  10.84 (s, 1H), 8.55 (t,  $J$  = 5.9 Hz, 1H), 8.38 (d,  $J$  = 8.2 Hz, 1H), 7.60 (d,  $J$  = 7.9 Hz, 1H), 7.36 (d,  $J$  = 8.1 Hz, 1H), 7.32 – 7.21 (m, 4H), 7.16 – 7.01 (m, 1H), 7.01 – 6.90 (m, 1H), 4.59 (td,  $J$  = 14.4, 8.2 Hz, 1H), 4.23 (qd,  $J$  = 15.5, 5.9 Hz, 2H), 3.44 (dd,  $J$  = 19.8, 14.4 Hz, 2H), 3.05 (ddd,  $J_{\text{AX}}$  = 22.8,  $J_{\text{BX}}$  = 14.4,  $J_{\text{AB}}$  = 7.3 Hz, 2H);

$^{13}\text{C}$  NMR (101 MHz, DMSO- $d_6$ )  $\delta$  172.0, 170.0, 138.7, 136.6, 135.8, 131.6, 131.4, 131.3 (Cx2), 129.2 (Cx2), 128.4 (Cx2), 127.7, 124.2, 121.4, 119.0, 118.7, 111.7, 110.4, 54.1, 41.8, 41.7, 28.5;

RP-HPLC Alltima™ C18 5 $\mu\text{m}$  150 mm x 4.6 mm, 10–100% B in 15 min,  $R_t$  = 13.69 min, 100%;

LRMS (ESI $^+$ )  $m/z$  479, 480  $[\text{M}+1\text{H}]^+$ , 100%; HRMS (ES $^+$ ) for  $\text{C}_{26}\text{H}_{23}\text{Cl}_2\text{N}_3\text{O}_2$ , calculated 480.1240, found 480.12396.

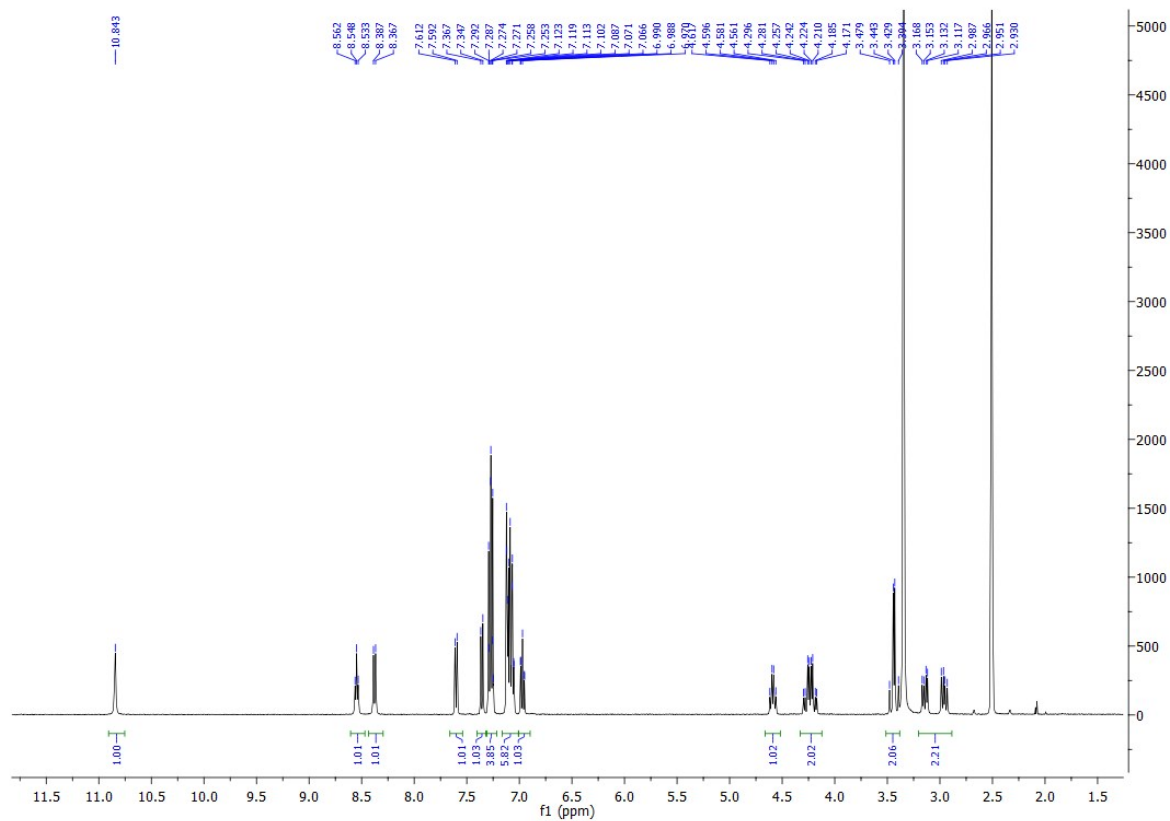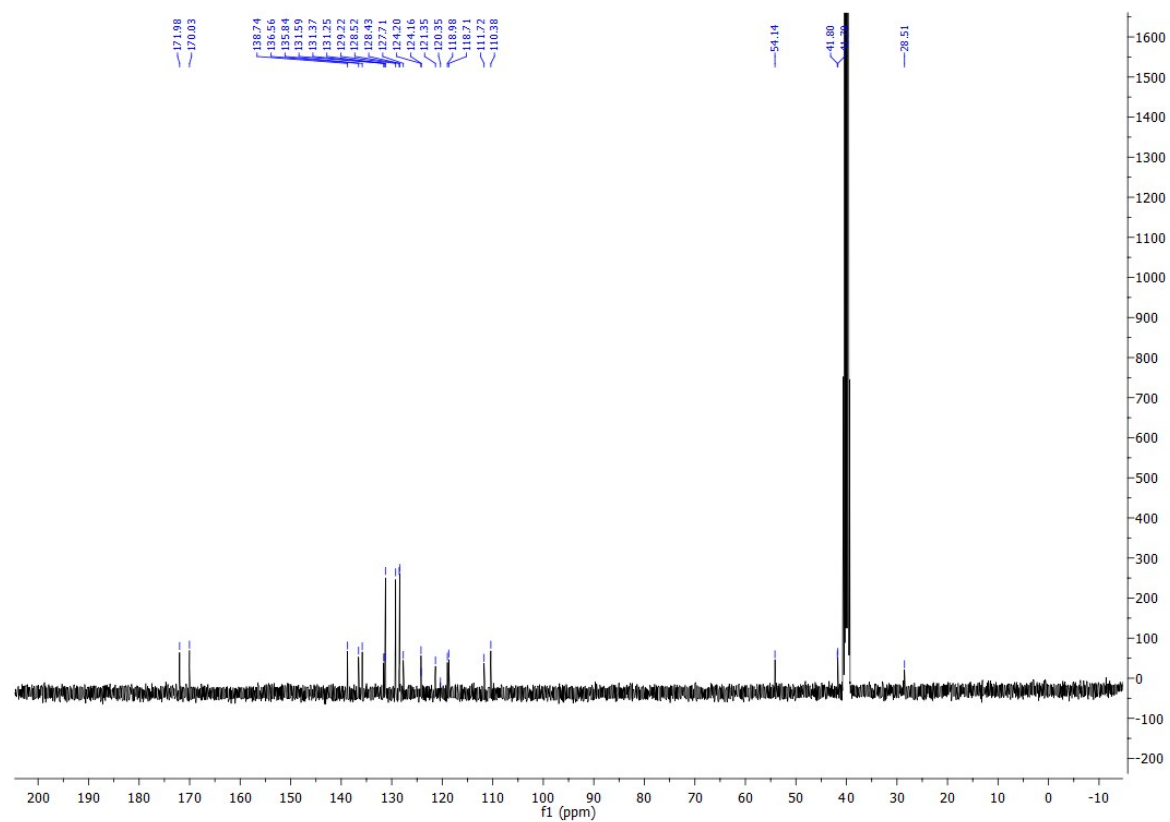

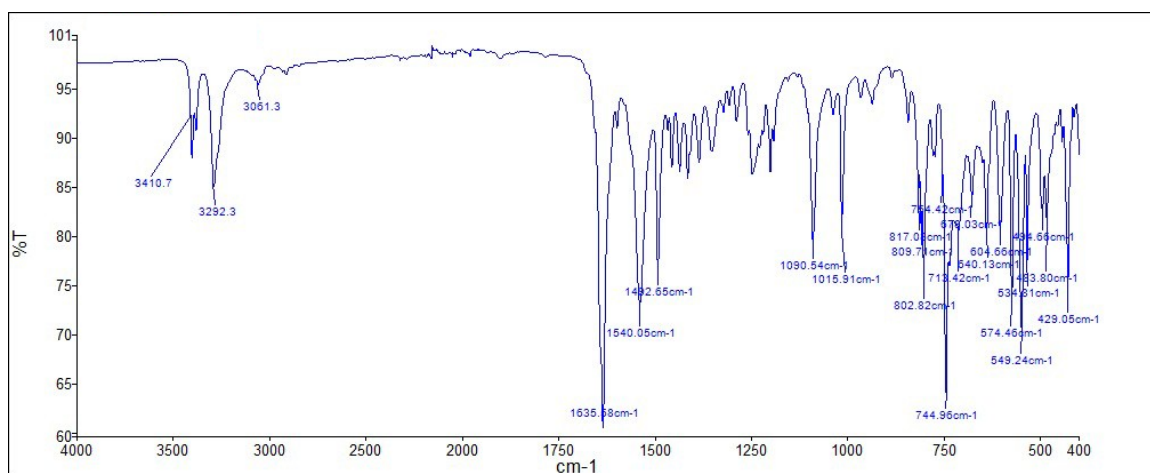

*1H-Indole-2-carboxylic acid [1-(4-chlorobenzylcarbamoyl)-2-(1H-indol-3-yl)-ethyl]-amide (14, L-isomer)*

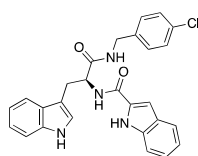

Yield: 97 mg, 50%. MP 229.5-230.7 °C;

IR:  $\nu_{\text{max}}/\text{cm}^{-1}$  3422 (NH), 3381 (NH), 3316 (NH), 1630 (CON);

$^1\text{H}$  NMR (400 MHz, DMSO-*d*<sub>6</sub>)  $\delta$  11.53 (s, 1H), 10.80 (s, 1H), 8.70 (t,  $J$  = 6.0 Hz, 1H), 8.57 (d,  $J$  = 8.1 Hz, 1H), 7.71 (d,  $J$  = 7.8 Hz, 1H), 7.62 (d,  $J$  = 8.0 Hz, 1H), 7.41 (d,  $J$  = 8.2 Hz, 1H), 7.33 (dd,  $J$  = 7.7, 5.5 Hz, 3H), 7.25 – 7.14 (m, 5H), 7.09 – 6.96 (m, 3H), 4.80 (ddd,  $J$  = 9.2, 8.4, 5.2 Hz, 1H), 4.31 (dd,  $J$  = 15.96, 6.0 Hz, 2H), 3.24 (ddd,  $J_{AX}$  = 28.6 Hz,  $J_{BX}$  = 14.56 Hz,  $J_{AB}$  = 5.2 Hz, 2H);

$^{13}\text{C}$  NMR (101 MHz, DMSO-*d*<sub>6</sub>)  $\delta$  172.3, 161.5, 138.9, 136.9, 136.5, 131.7, 129.3 (Cx2), 128.6 (Cx2), 127.7, 127.5, 124.3, 123.8, 122.0, 121.4, 120.2, 119.0, 118.7, 112.7, 111.8, 110.8, 103.8, 54.5, 41.9, 28.2;

RP-HPLC Alltima™ C18 5  $\mu\text{m}$  150 mm x 4.6 mm, 10–100% B in 15 min,  $R_t$  = 13.35 min, 100%;

LRMS (APCI<sup>+</sup>)  $m/z$  470, 471  $[\text{M}+1\text{H}]^+$ , 90%; HRMS (ES<sup>+</sup>) for C<sub>27</sub>H<sub>23</sub>ClN<sub>4</sub>O<sub>2</sub> calculated 471.1582, found 471.1582.

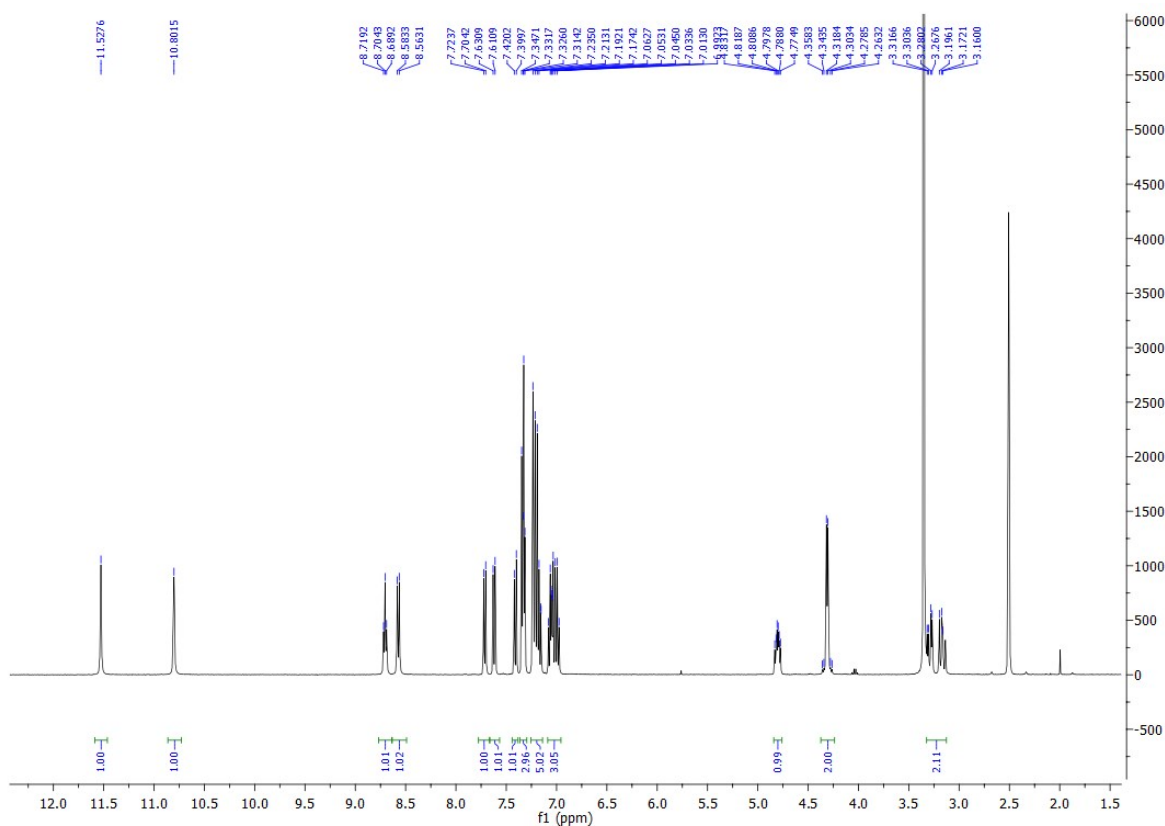

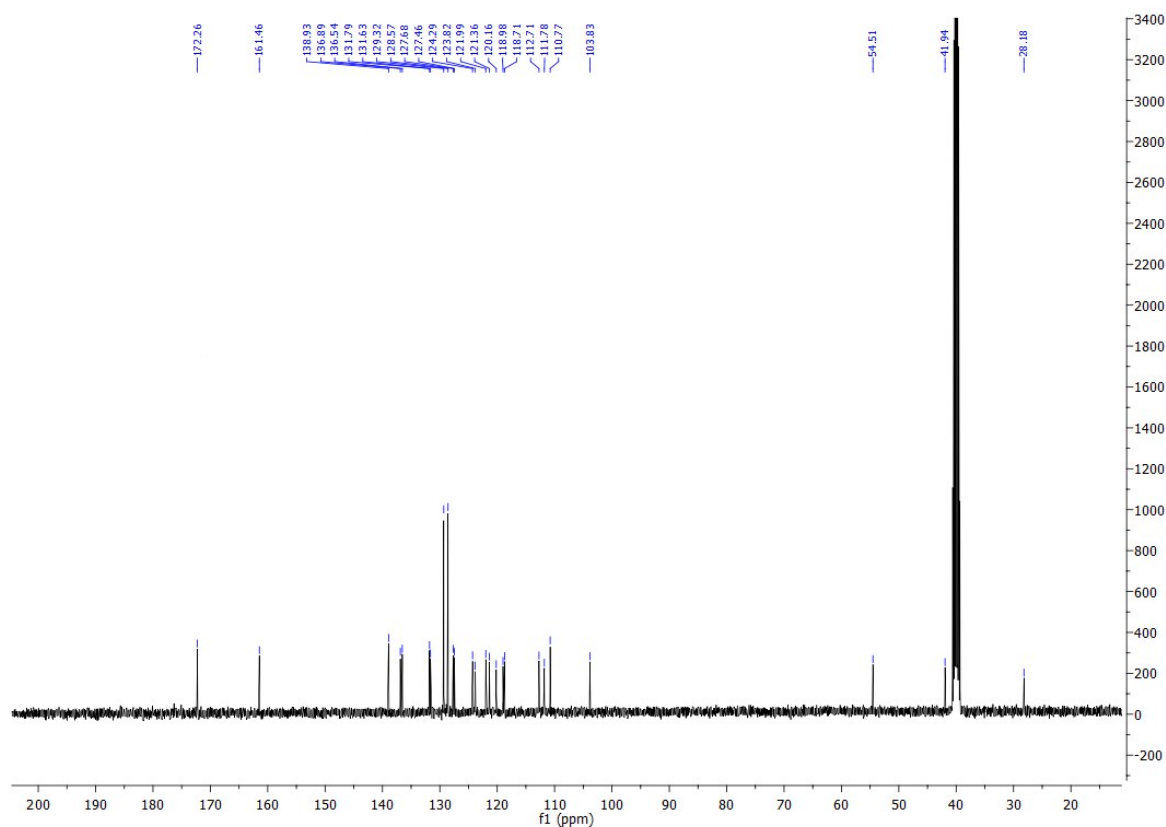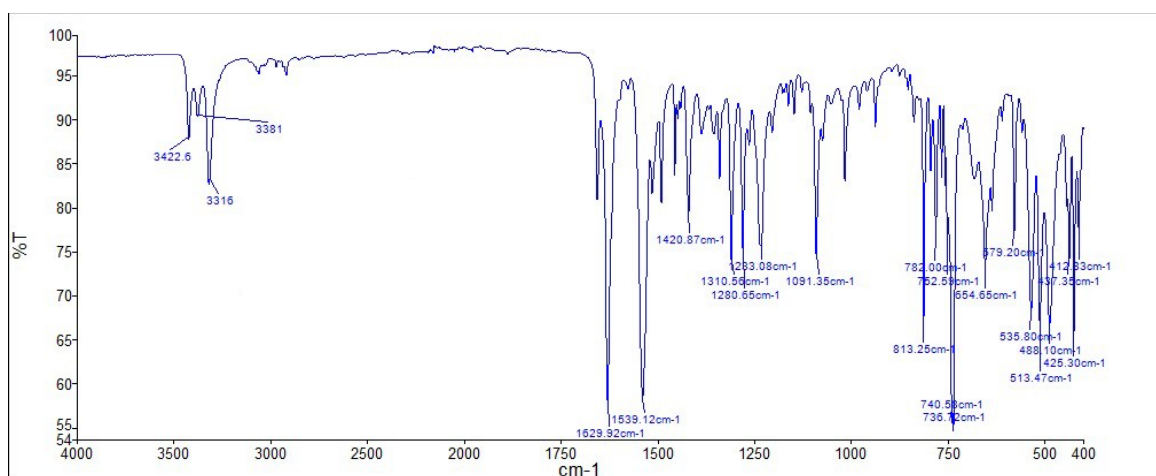

*1H-Indole-2-carboxylic acid [1-(4-chlorobenzylcarbamoyl)-2-(1H-indol-3-yl)-ethyl]-amide (14a, D-isomer)*

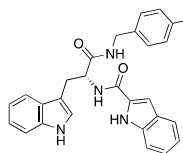

Yield: 156 mg, 48%. MP 227-227.5 °C;

IR:  $\nu_{\text{max}}/\text{cm}^{-1}$  3420 (NH), 3382 (NH), 3325 (NH), 1630 (CONH), 1656 (CON), 737 (CH-aromatics);

$^1\text{H}$  NMR (400 MHz,  $\text{DMSO}-d_6$ )  $\delta$  11.53 (s, 1H), 10.81 (d,  $J = 1.6$  Hz, 1H), 8.71 (t,  $J = 6.0$  Hz, 1H), 8.58 (d,  $J = 8.1$  Hz, 1H), 7.72 (d,  $J = 7.8$  Hz, 1H), 7.63 (d,  $J = 8.0$  Hz, 1H), 7.45 – 7.39 (m, 1H), 7.37 – 7.30 (m, 3H), 7.26 – 7.14 (m, 5H), 7.11 – 6.95 (m, 3H), 4.82 (ddd,  $J = 9.2, 8.4, 5.2$  Hz, 1H), 4.32 (dd,  $J = 16.4, 6.0$  Hz, 2H), 3.23 (ddd,  $J_{AX} = 28.8$  Hz,  $J_{BX} = 14.4$  Hz,  $J_{AB} = 9.2$  Hz, 2H);

$^{13}\text{C}$  NMR (101 MHz,  $\text{DMSO}-d_6$ )  $\delta$  172.3, 161.5, 138.9, 136.9, 136.6, 131.8, 131.7, 129.3 (2C), 128.6 (2C), 127.7, 127.5, 124.3, 123.8, 122.0, 121.4, 120.2, 119.0, 118.7, 112.7, 111.8, 110.8, 103.9, 54.5, 42.0, 28.2;

RP-HPLC Alltima™ C18 5  $\mu\text{m}$  150 mm x 4.6 mm, 10–100% B in 15 min,  $R_t = 6.44$  min, 100%;

LRMS ( $\text{ESI}^+$ )  $m/z$  470, 470  $[\text{M}+\text{H}]^+$ , 80%. HRMS ( $\text{ES}^+$ ) for  $\text{C}_{27}\text{H}_{23}\text{ClN}_4\text{O}_2$  calculated 471.1582, found 471.1584.

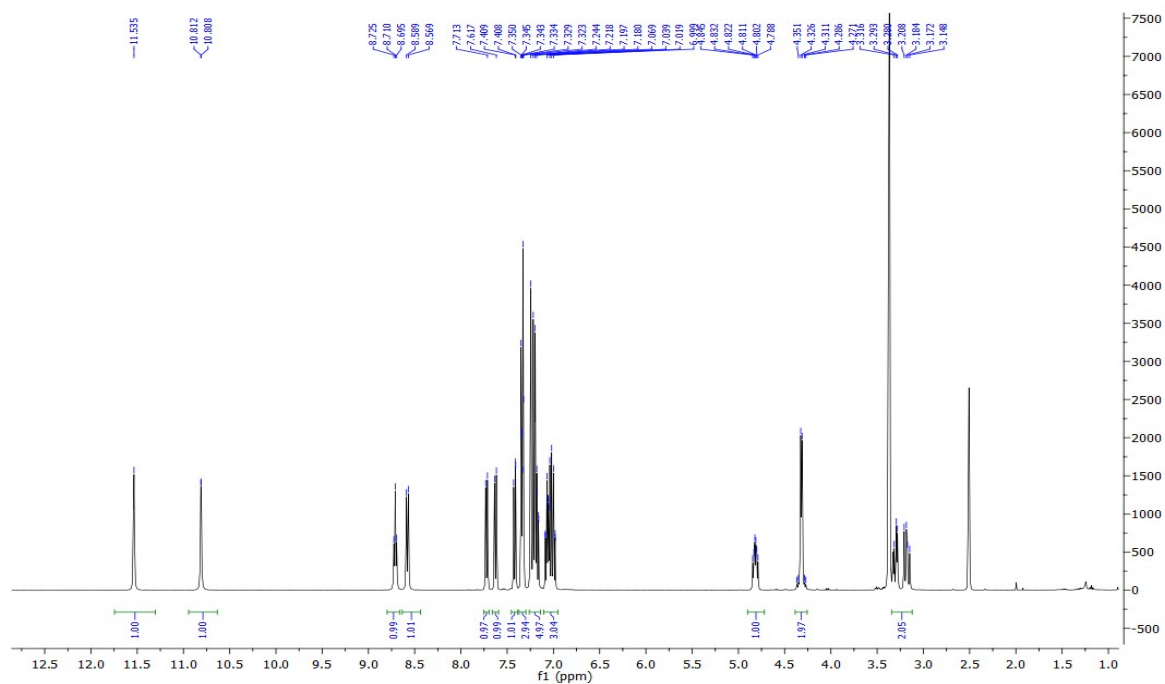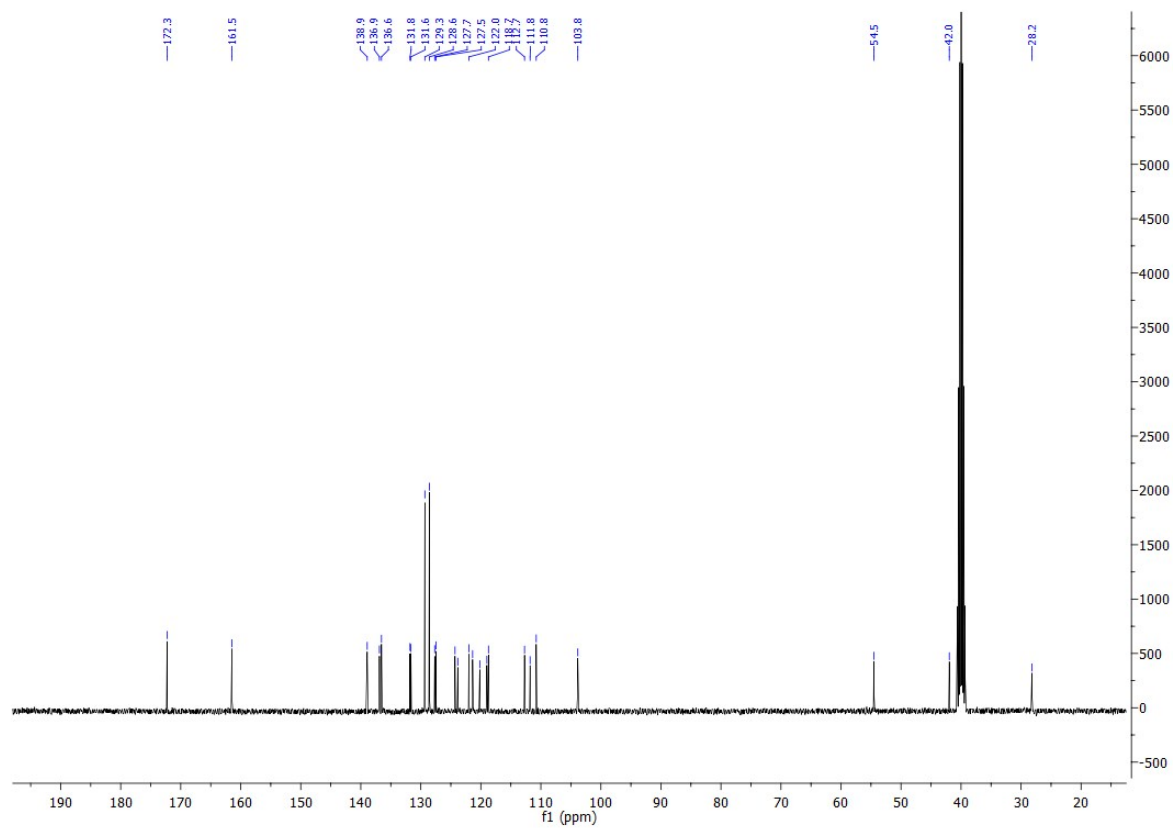

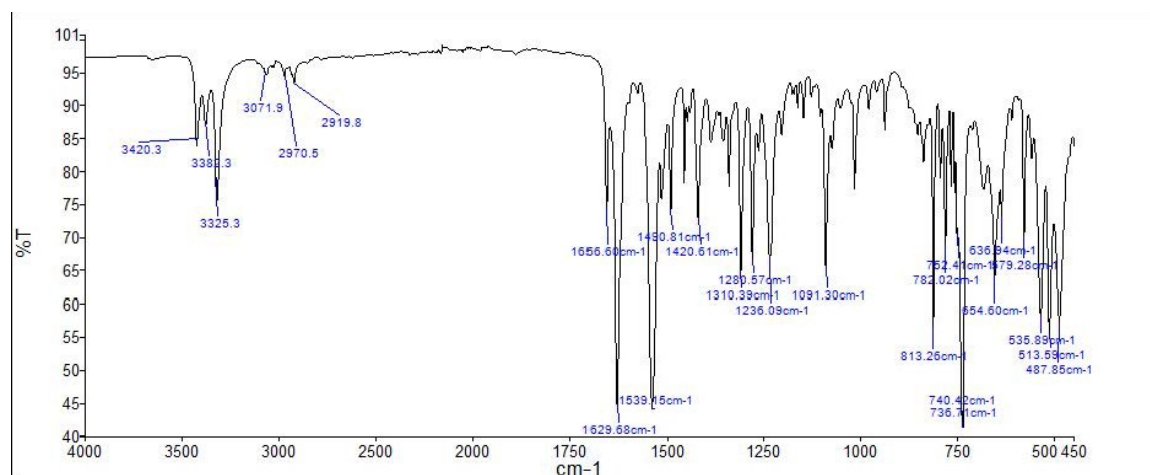

*Naphthalene-1-carboxylic acid [1-(4-chlorobenzylcarbamoyl)-2-(1H-indol-3-yl)-ethyl]-amide (15)*

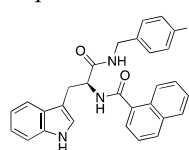

Yield: 57 mg, 41%. MP 165.7-166.5 °C;

IR:  $\nu_{\text{max}}/\text{cm}^{-1}$  3398 (NH), 3268 (bp NH), 3049 (CH), 1627 (CON), 739 (CH-aromatics);

$^1\text{H}$  NMR (400 MHz,  $\text{DMSO}-d_6$ )  $\delta$  10.89 (s, 1H), 8.73–8.67 (m, 2H) (overlapping two NH amides), 8.02 – 7.86 (m, 3H), 7.74 (d,  $J = 7.8$  Hz, 1H), 7.57 – 7.47 (m, 3H), 7.47 – 7.32 (m, 4H), 7.27 (d,  $J = 8.5$  Hz, 3H), 7.11 (dd,  $J = 11.1, 3.9$  Hz, 1H), 7.02 (dd,  $J = 11.0, 3.9$  Hz, 1H), 4.93 (td,  $J = 9.3, 5.2$  Hz, 1H), 4.37 (ddd,  $J = 16.0, 6.0$  Hz, 2H), 3.23 (ddd,  $J_{AX} = 36.4, J_{BX} = 14.4, J_{AB} = 5.2$  Hz, 2H);

$^{13}\text{C}$  NMR (101 MHz,  $\text{DMSO}-d_6$ )  $\delta$  172.3, 169.0, 139.0, 136.7, 135.0, 133.5, 131.7, 130.2 (Cx2), 129.4 (Cx2), 128.6 (Cx3), 127.8, 126.9, 126.6, 126.0, 125.8, 125.3, 124.4, 121.4, 119.1, 118.7, 111.8, 110.7, 54.8, 42.0, 28.1;

RP-HPLC Alltima™ C18 5  $\mu\text{m}$  150 mm x 4.6 mm, 10–100% B in 15 min,  $R_t = 13.62$  min, 99.1%;

LRMS (APCI $^+$ )  $m/z$  481, 482  $[\text{M}+1\text{H}]^+$ , 90%. HRMS (ES $^+$ ) for  $\text{C}_{29}\text{H}_{24}\text{ClN}_3\text{O}_2$ , calculated 482.1630, found 482.1630.

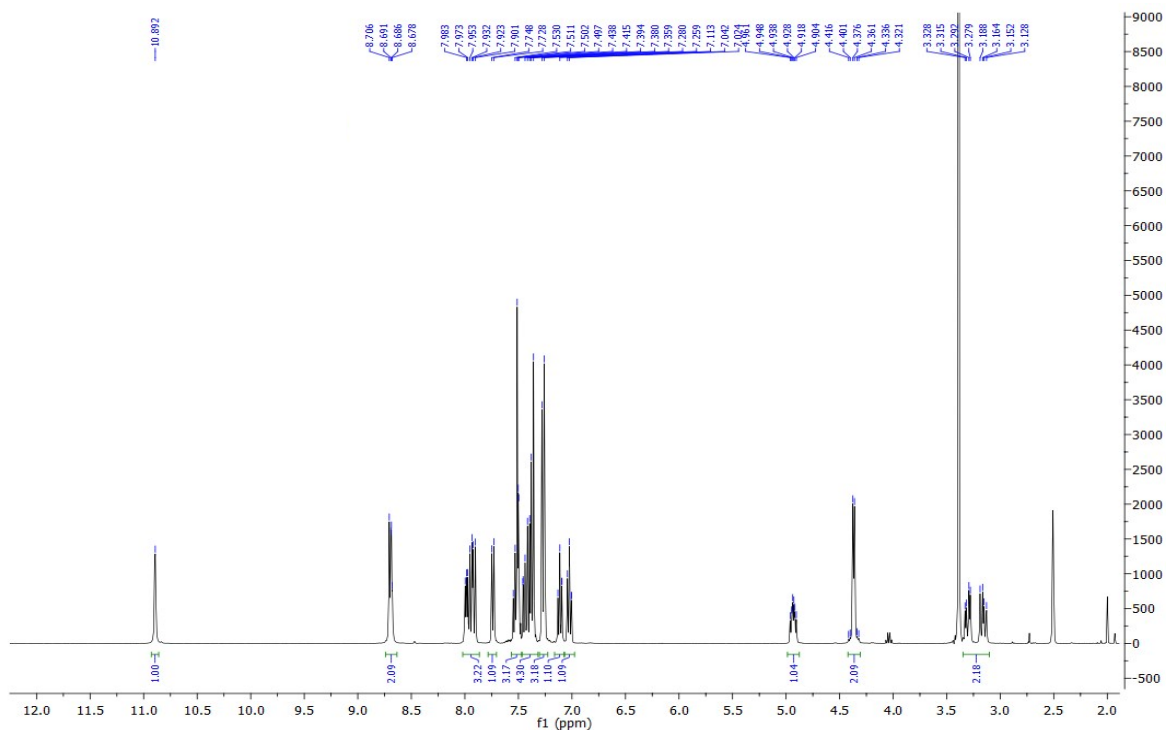



*N*-[1-(4-Chlorobenzylcarbamoyl)-2-(1*H*-indol-3-yl)-ethyl]-3,3,3-trifluoro-2-methoxy-2-phenyl-propionamide (**17**)

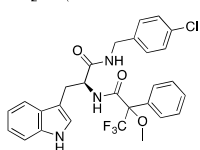

Yield: 171 mg, 71%. MP 171 – 172 °C;

IR:  $\nu_{\text{max}}$ /cm<sup>-1</sup> 3310 (bp, NH), 2925 (CH), 1657(CON), 741 (CH-aromatics);

<sup>1</sup>H NMR (400 MHz, DMSO-*d*<sub>6</sub>)  $\delta$  10.82 (s, 1H), 8.70 (t, *J* = 5.9 Hz, 1H), 8.17 (d, *J* = 8.5 Hz, 1H), 7.62 (d, *J* = 7.9 Hz, 1H), 7.43 – 7.32 (m, 4H), 7.30 – 7.18 (m, 4H), 7.13 – 7.01 (m, 3H), 7.01 – 6.90 (m, 2H), 4.81 (td, *J* = 8.6, 6.0 Hz, 1H), 4.32 (qd, *J* = 15.4, 5.8 Hz, 2H), 3.27 (s, 3H), 3.22 –

3.07 (m, 2H);

<sup>13</sup>C NMR (101 MHz, DMSO-*d*<sub>6</sub>)  $\delta$  171.4, 165.6, 138.6, 136.6, 132.8, 131.8, 129.8, 129.4 (Cx4), 128.7 (Cx2), 128.6 (Cx4), 127.8, 124.4, 121.4, 119.0, 118.7, 111.7, 109.9, 84.4, 84.2, 83.9, 83.7, 55.2, 53.8, 42.0, 28.1. *Note: CF<sub>3</sub> splitting at 84.0 (q, *J* = 25.2 Hz) and presented in italics;*

RP-HPLC Alltima™ C18 5  $\mu$ m 150 mm x 4.6 mm, 10–100% B in 15 min, *R*<sub>t</sub> = 14.53 min, 100%

LRMS (APCI<sup>+</sup>) *m/z* 543, 544 [M+ H]<sup>+</sup>, 50%. HRMS (ES<sup>+</sup>) for C<sub>28</sub>H<sub>25</sub>ClF<sub>3</sub>N<sub>3</sub>O<sub>3</sub>, calculated 543.1646, found 544.16105

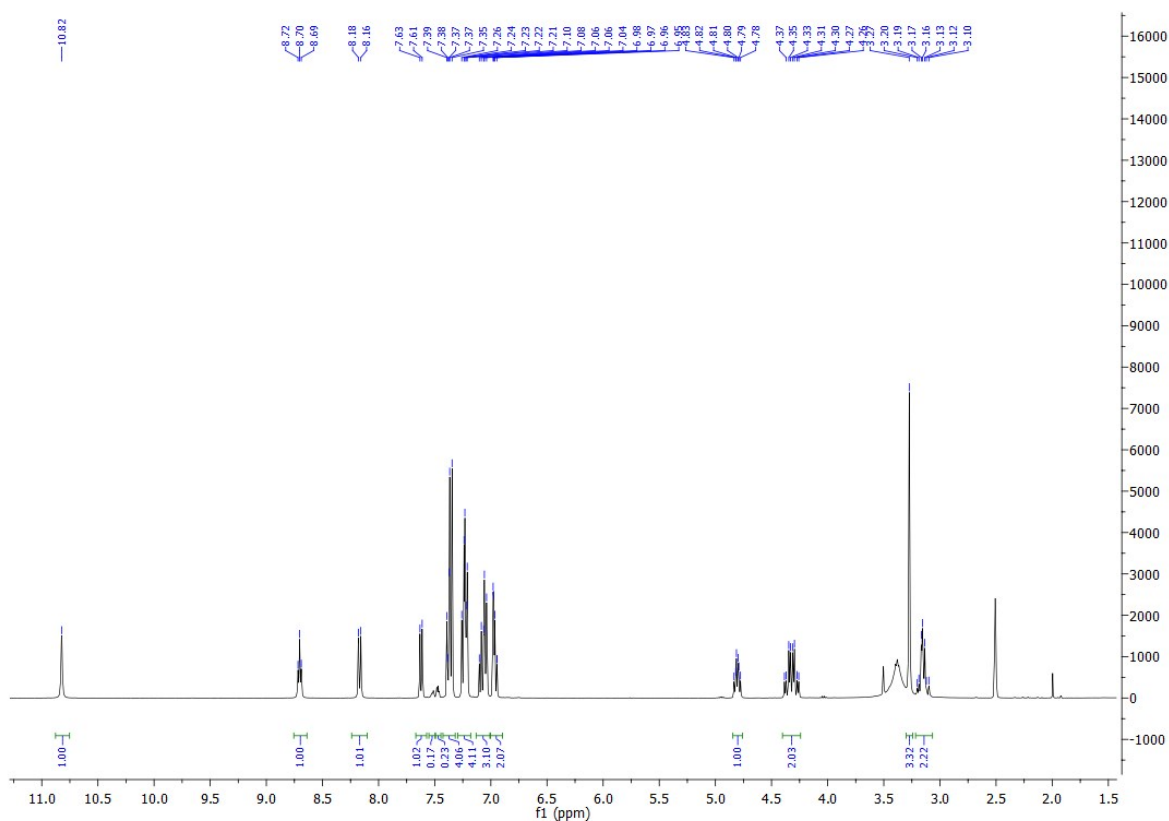

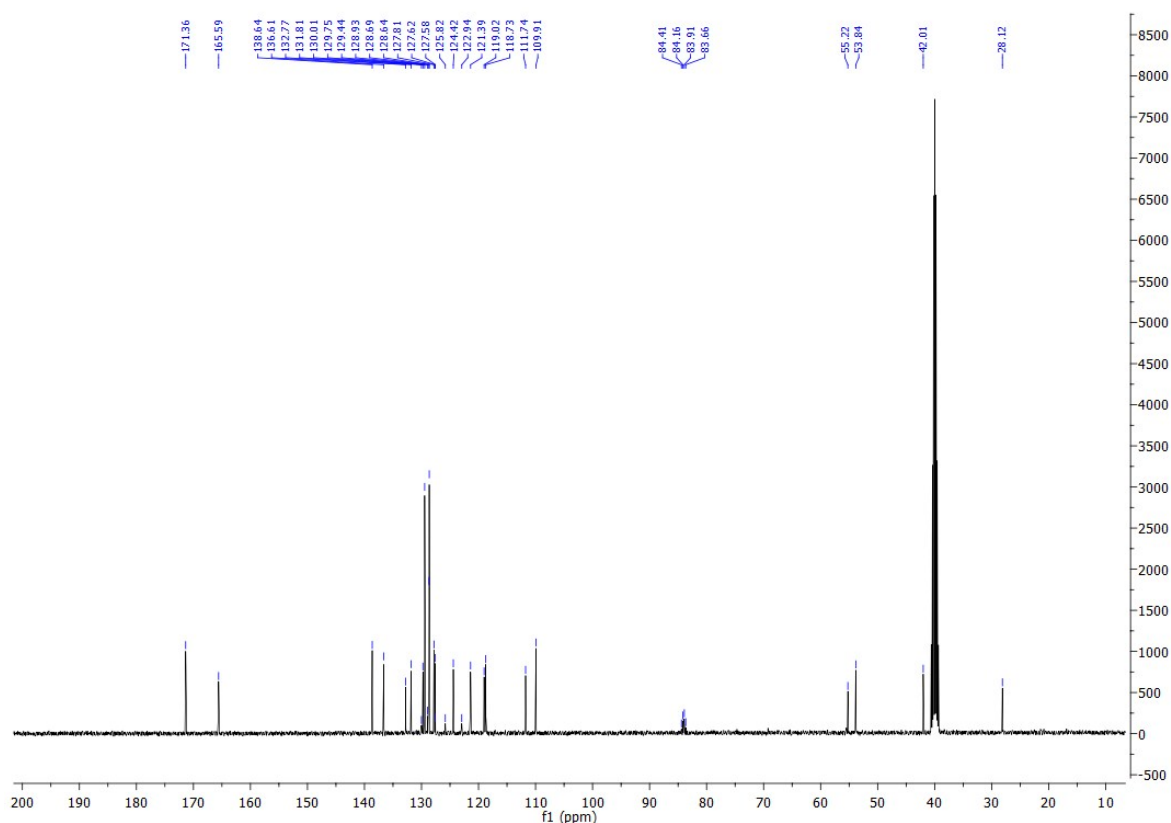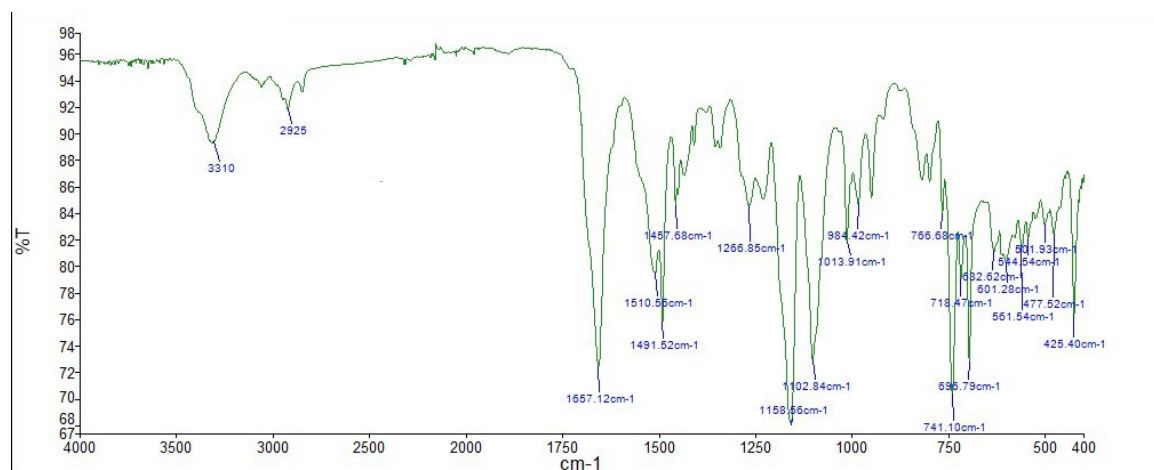

*N*-(1,3-Benzodioxol-4-ylmethyl)-*N*-[2-(1*H*-indol-3-yl)ethyl]-naphthalene carboxamide (**18**)

Yield: 110 mg, 67%. MP 199 – 200 °C;

IR:  $\nu_{\text{max}}$ /cm<sup>-1</sup> 3215 (NH), 1608 (CON), 743 (CH-aromatics);

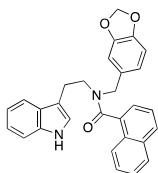

\*Proton and carbon spectra displays an atropisomeric property of compound **5**, with the approximate ratio 1:0.66 calculated based on the proton benzodioxole  $\underline{\text{CH}_2}$  peaks at 6.05 and 5.97 ppm, respectively.

<sup>1</sup>H NMR (400 MHz, DMSO-*d*<sub>6</sub>)  $\delta$  10.91 (s, 0.67H), 10.71 (s, 1H), 8.07 – 7.89 (m, 3.33H), 7.75 – 7.64 (m, 1H), 7.64 – 7.44 (m, 7H), 7.42 – 7.16 (m, 3.3H), 7.14 – 7.06 (m, 1.67H), 7.06 – 6.78 (m, 5.33H), 6.71 – 6.56 (m, 2.33H), 6.39 (d, *J* = 7.9 Hz, 1H), 6.05 (s, 2H), 5.97 (s, 1.33H), 5.01 – 4.70 (m, 2H), 4.26 – 4.02 (m, 2H), 3.43 (d, *J* = 20.9 Hz, 0.67H), 3.26 – 2.98 (m, 3.33H), 2.91 – 2.66 (m, 2H);

<sup>13</sup>C NMR (101 MHz, DMSO-*d*<sub>6</sub>)  $\delta$  170.4, 170.0, 148.0, 148.0, 147.1, 147.0, 136.8, 136.4, 135.1, 135.0, 133.5, 133.4, 132.3, 130.7, 129.5, 129.2, 129.0, 128.9, 128.9, 127.7, 127.5, 127.1, 126.9, 125.8, 125.0, 124.7, 124.1, 123.6, 123.3, 122.1, 121.5, 121.3, 121.1, 118.9, 118.8, 118.5, 118.0, 111.9, 111.8, 111.7, 110.7, 109.1, 108.8, 108.7, 108.1, 101.5, 51.8, 49.2, 47.1, 44.5, 24.9, 23.1;

RP-HPLC Alltima™ C18 5  $\mu$ m 150 mm x 4.6 mm, 10–100% B in 15 min, *R*<sub>t</sub> = 18.06 min, 100%

LRMS (APCI<sup>+</sup>) *m/z* 448, 449 [*M*+1*H*]<sup>+</sup>, 100%. HRMS (ES<sup>+</sup>) for C<sub>29</sub>H<sub>24</sub>N<sub>2</sub>O<sub>3</sub>, calculated 449.1860, found 449.1859.

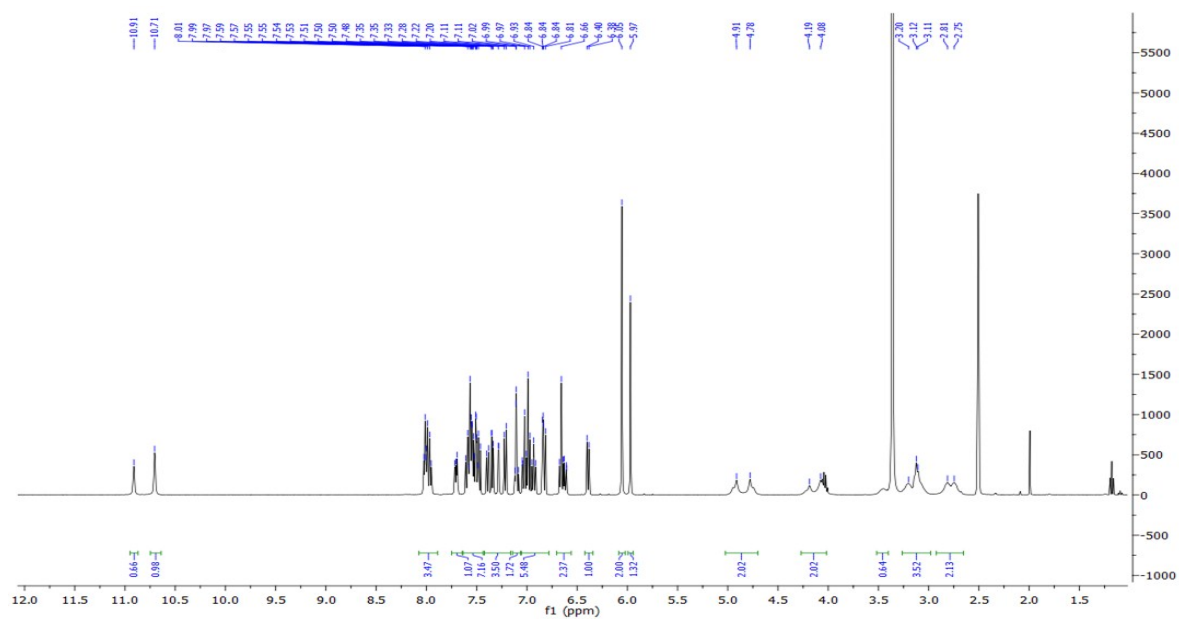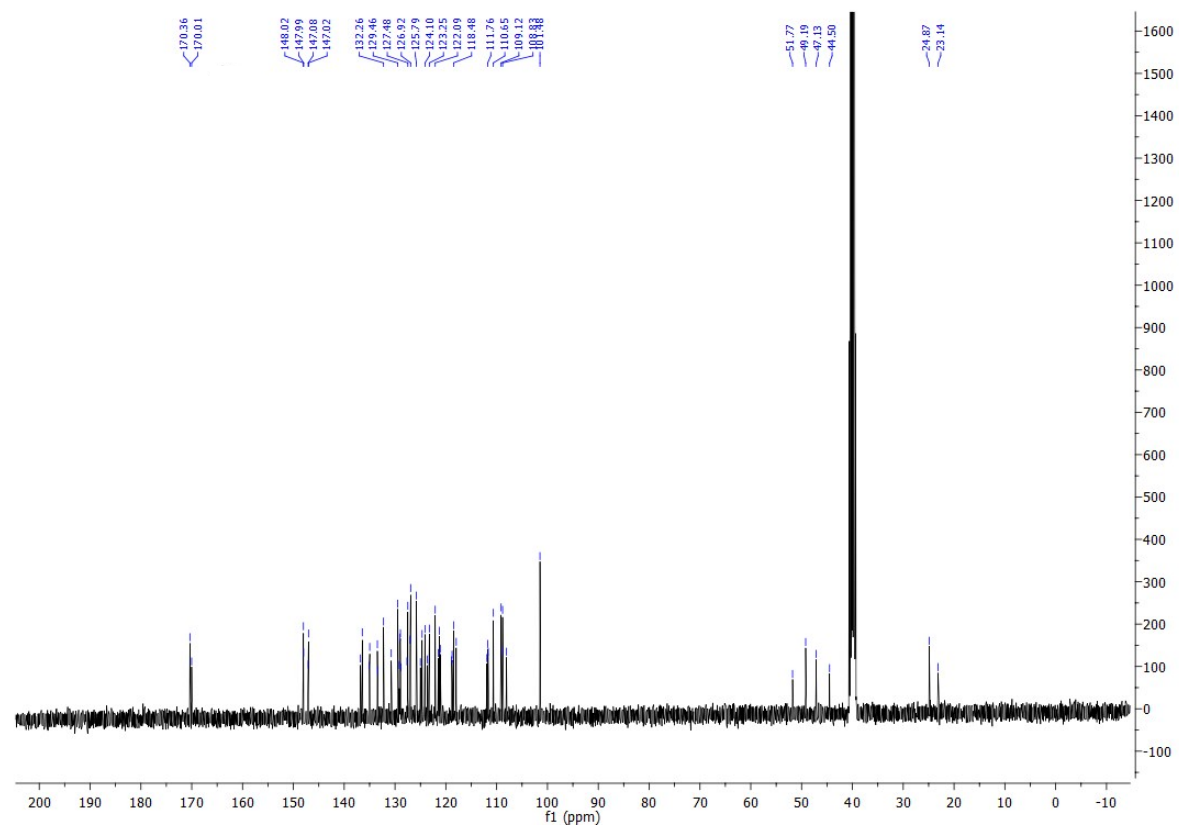

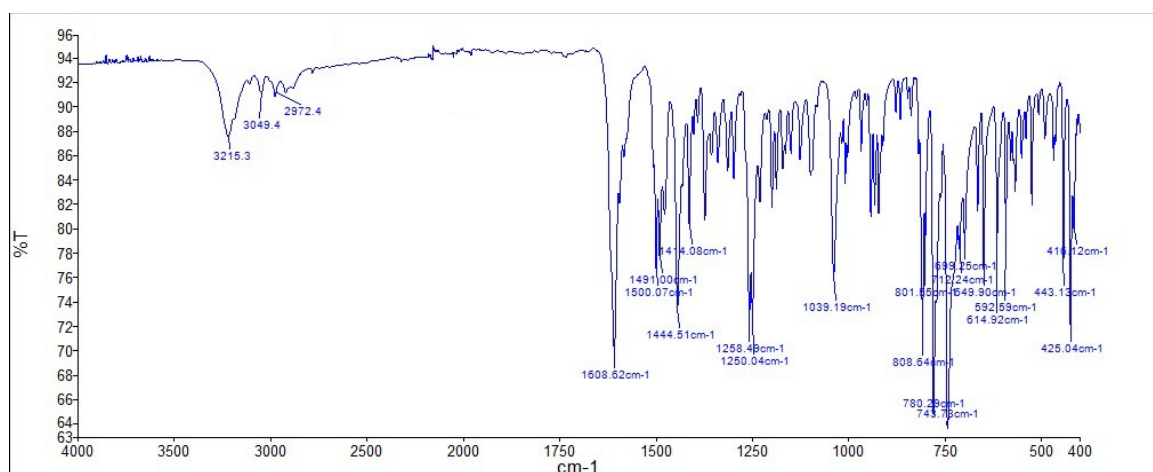

*N*-(2-(1*H*-Indol-3-yl)ethyl)-*N*-(benzo[*d*][1,3]dioxol-5-ylmethyl)-1*H*-indole-2-carboxamide (**20**)

Yield: 140 mg, 67%. MP 198-199 °C;

IR:  $\nu_{\text{max}}$ /cm<sup>-1</sup> 3440 (NH), 3274 (NH), 1620 (CON);

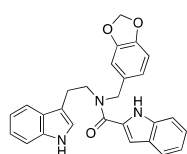

<sup>1</sup>H NMR (400 MHz, DMSO-*d*<sub>6</sub>)  $\delta$  11.72 (s, 1H), 10.86 (s, 1H), 7.72 – 7.29 (m, 4H), 7.20 (dd, *J* = 9.2, 4.8 Hz, 2H), 7.13 – 6.58 (m, 7H), 6.01 (s, 2H), 4.81 (bs, 2H), 3.76 (bs, 2H), 3.09 (s, 2H);

<sup>13</sup>C NMR (101 MHz, DMSO-*d*<sub>6</sub>)  $\delta$  163.7, 148.1, 147.0, 136.7, 136.4, 131.9, 130.5, 127.5, 123.8, 123.3, 121.9, 121.5, 120.2, 118.8, 118.7, 112.5, 111.9, 111.2, 108.8, 107.7, 103.7, 101.5, 52.4, 48.6, 47.7, 24.7, 23.3;

RP-HPLC Alltima™ C18 5  $\mu$ m 150 mm x 4.6 mm, 10–100% B in 15 min, Rt = 14.68 min, 100%;

LRMS (APCI<sup>+</sup>) *m/z* 437, 438 [M+1], 70%. HRMS (ES<sup>+</sup>) for C<sub>27</sub>H<sub>23</sub>N<sub>3</sub>O<sub>3</sub>, calculated 438.18122, found 439.18110.

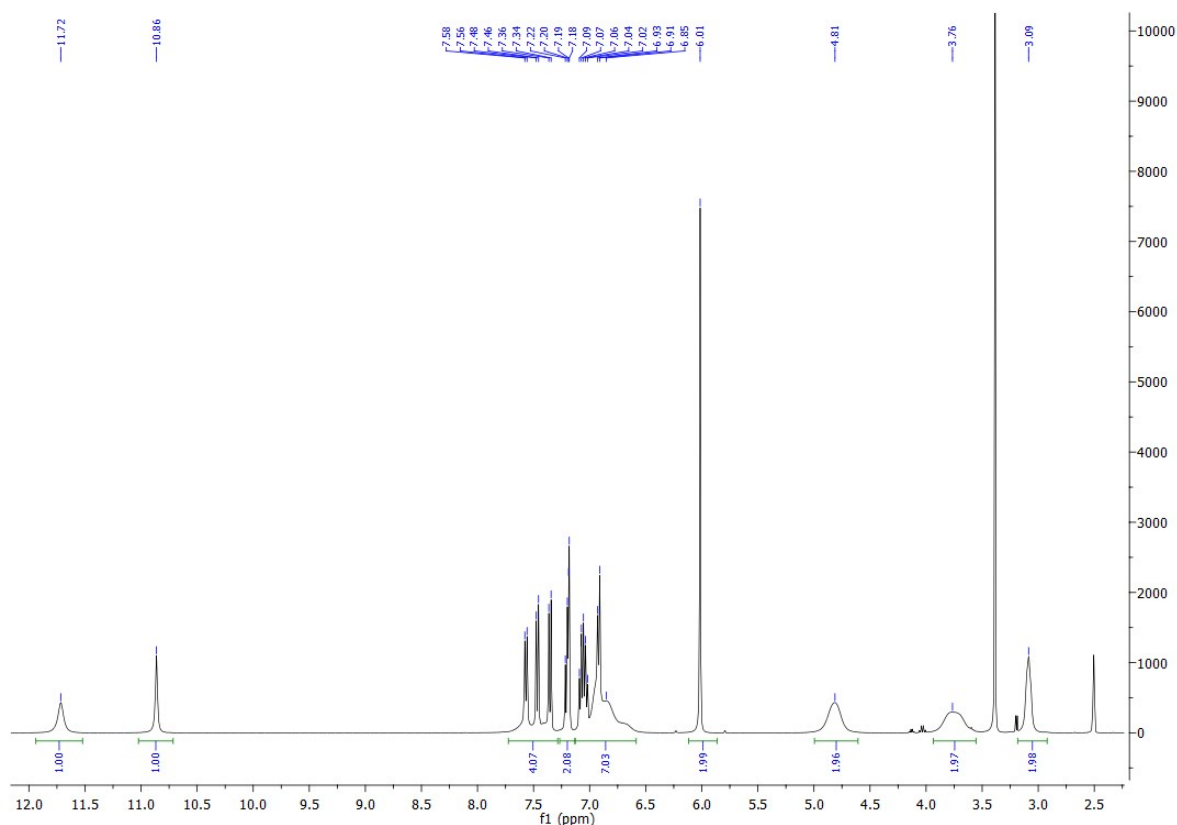

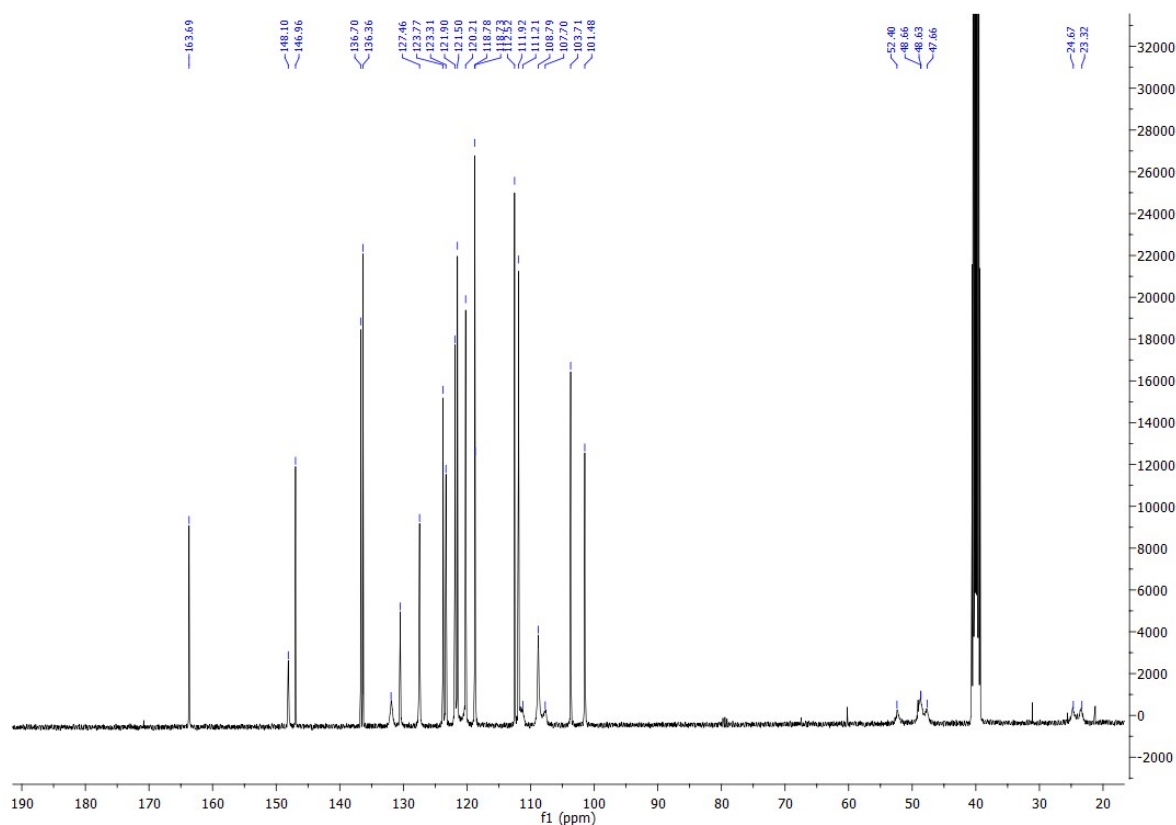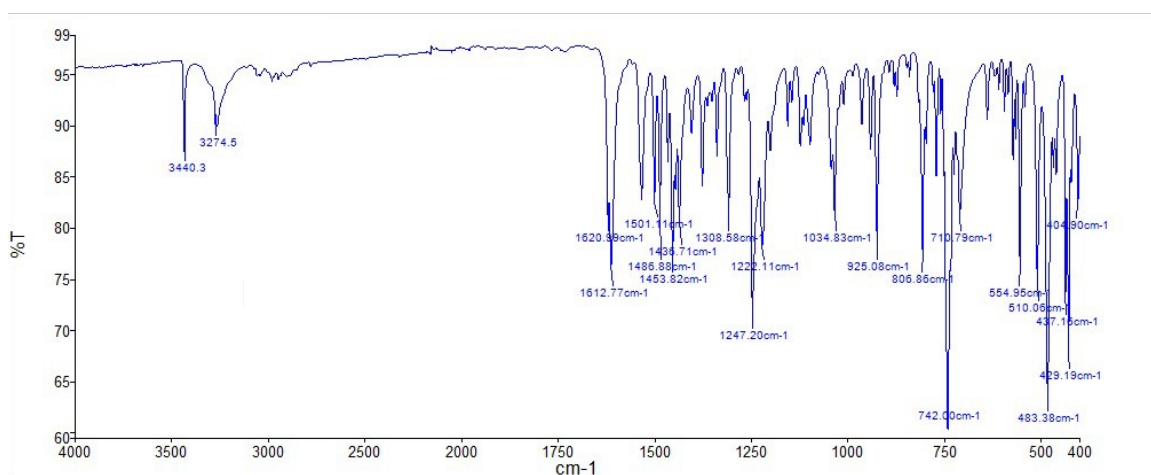

*Benzo[b]thiophene-2-carboxylic acid benzo[1,3]dioxol-5-ylmethyl-[2-(1H-indol-3-yl)-ethyl]-amide (21)*

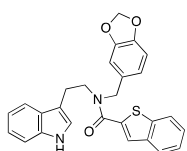

Yield: 118 mg, 53%. MP 166 – 167 °C;

IR:  $\nu_{\text{max}}/\text{cm}^{-1}$  3331 (NH), 1627 (CON);

$^1\text{H}$  NMR (400 MHz,  $\text{DMSO}-d_6$ )  $\delta$  10.85 (s, 1H), 8.00 (d,  $J$  = 8.2 Hz, 1H), 7.81 (s, 1H), 7.70 – 6.64 (m, 11H), 6.02 (s, 2H), 4.73 (s, 2H), 3.65 (s, 2H), 3.12 – 2.91 (m, 2H);

$^{13}\text{C}$  NMR (101 MHz,  $\text{DMSO}-d_6$ )  $\delta$  164.5, 148.1, 147.0, 139.7, 139.1, 137.7, 136.6, 131.5, 127.5, 126.32, 125.3 (Cx2), 125.2, 123.5, 122.9, 121.5 (Cx2), 118.7 (Cx2), 118.6, 111.9, 110.9, 108.8, 101.5, 49.6, 48.4, 24.7; RP-HPLC Alltima™ C18 5  $\mu\text{m}$  150 mm x 4.6 mm, 10–100% B in 15 min,  $R_t$  = 14.97 min, 100%; LRMS (APCI $^+$ )  $m/z$  454, 455  $[\text{M}+\text{H}]^+$ , 100%. HRMS (ES $^+$ ) for  $\text{C}_{27}\text{H}_{22}\text{N}_2\text{O}_3\text{S}$ , calculated 455.14239, found 455.14231.

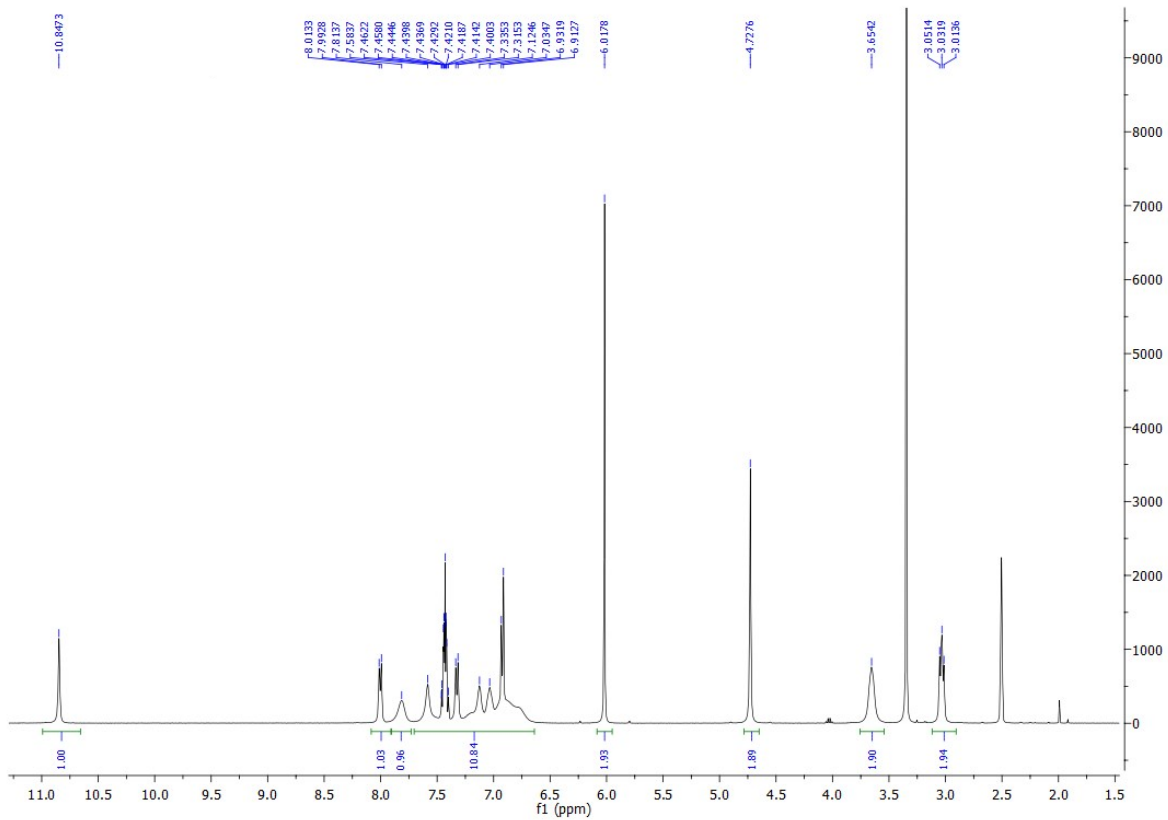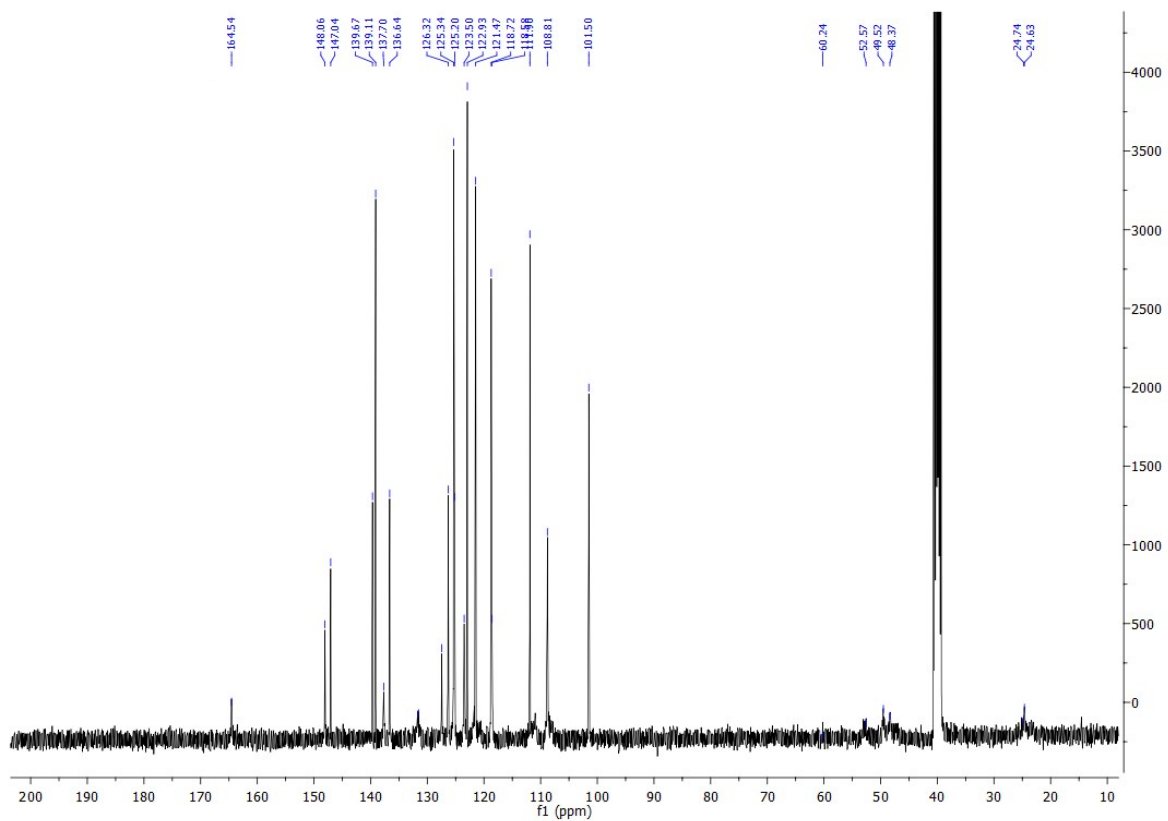

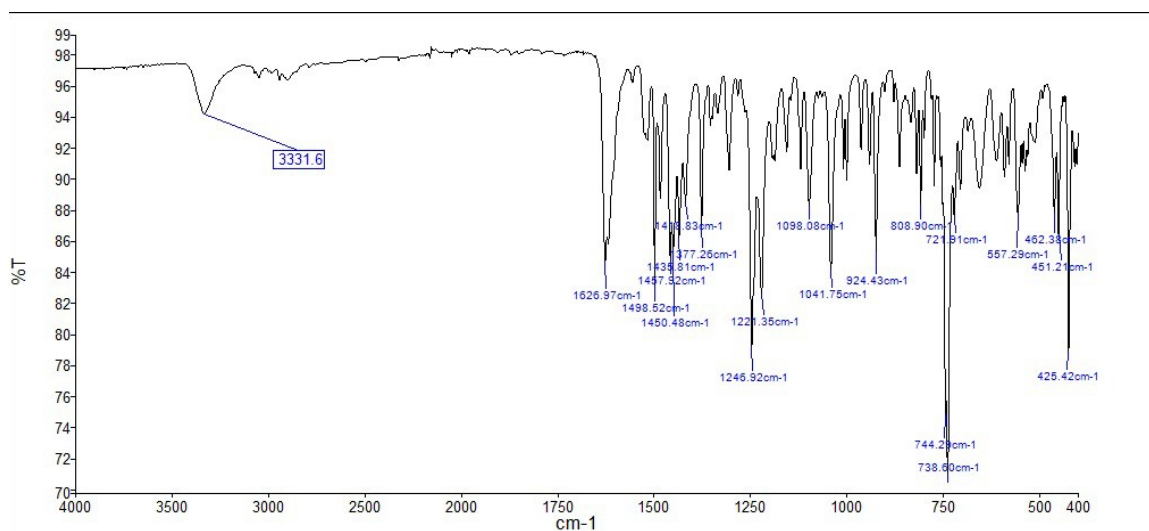

*Benzofuran-2-carboxylic acid benzo[1,3]dioxol-5-ylmethyl-[2-(1H-indol-3-yl)-ethyl]-amide (22)*

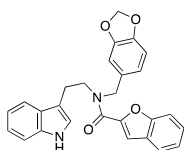

Yield: 156 mg, 63%. MP 173 – 173.6 °C;

IR:  $\nu_{\text{max}}/\text{cm}^{-1}$  3316 (NH), 1627 (CON), 737 (CH-aromatic);

$^1\text{H}$  NMR (400 MHz,  $\text{DMSO-}d_6$ )  $\delta$  10.83 (s, 1H), 7.72 (d,  $J = 5.8$  Hz, 1H), 7.62 (d,  $J = 8.3$  Hz, 1H), 7.58 – 7.26 (m, 5H), 7.19 – 6.71 (m, 6H), 6.01 (s, 2H), 4.72 (s, 2H), 3.91 – 3.51 (m, 2H), 3.05 (s, 2H);

$^{13}\text{C}$  NMR (101 MHz,  $\text{DMSO-}d_6$ )  $\delta$  154.4, 149.3, 148.0, 147.0, 136.7, 131.7, 129.0, 127.4, 127.2, 126.9, 124.1, 123.6, 122.9, 122.0, 121.4, 118.7, 118.5, 112.2, 111.9, 111.1, 109.0, 108.8, 101.5, 48.7, 48.8, 25.1;

RP-HPLC Alltima™ C18 5  $\mu\text{m}$  150 mm x 4.6 mm, 10–100% B in 15 min,  $R_t = 7.12$  min, 100%;

LRMS (APCI+/-)  $m/z$  438, 439  $[\text{M}+\text{H}]^+$ , 100%. HRMS (ES+) for  $\text{C}_{27}\text{H}_{22}\text{N}_2\text{O}_4$ , calculated 439.16523, found 439.16523.

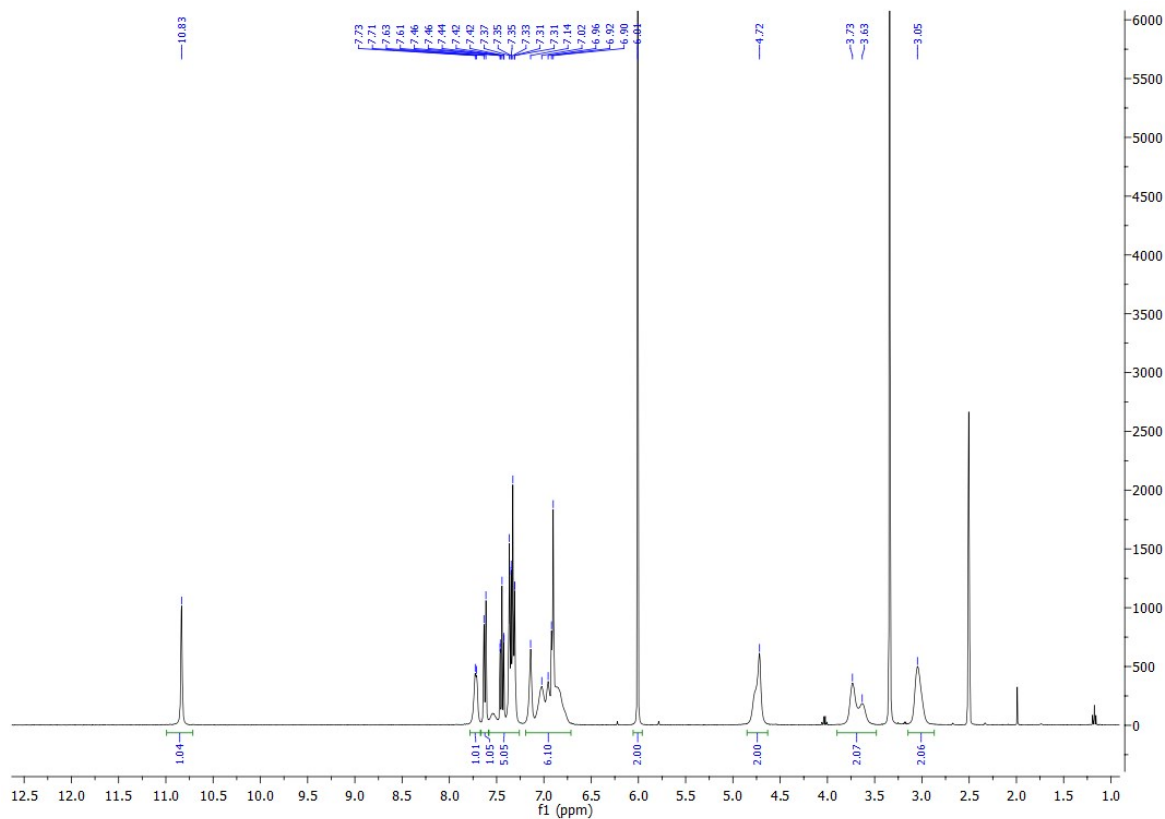

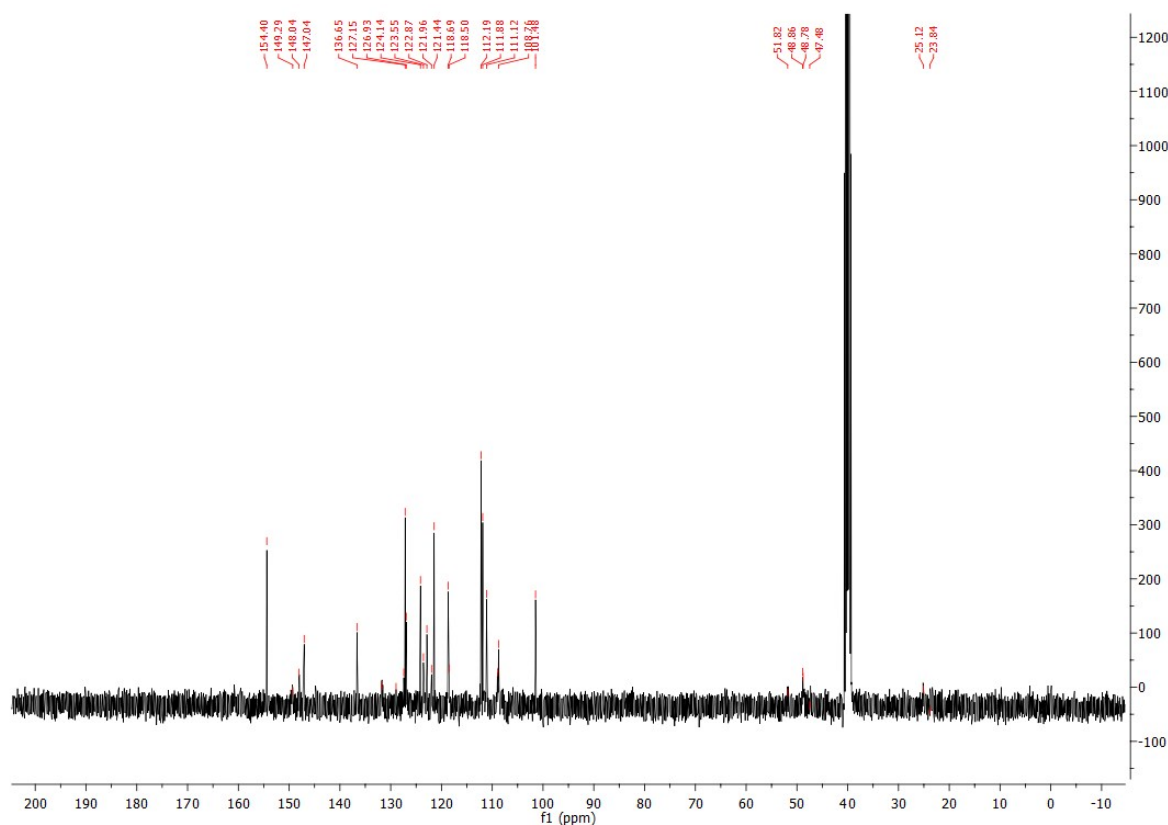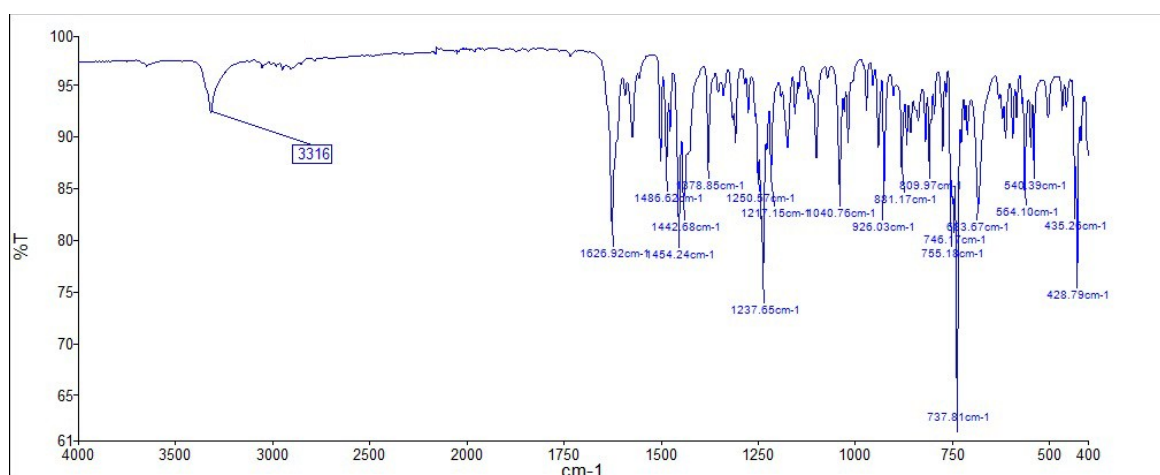

*N*-Benzo[1,3]dioxol-5-ylmethyl-4-chloro-*N*-[2-(1*H*-indol-3-yl)-ethyl]-benzamide (**23**)

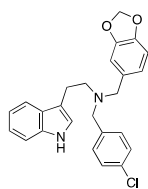

Yield: 90 mg, 58%. MP 132-133 °C;

IR:  $\nu_{\max}/\text{cm}^{-1}$  3203 (NH), 1626 (CON), 1500 (C=C aromatic), 1251 (C-N), 747 (C-H aromatic);

*This is a mixture of atropoisomers of compound 23 with the ratio approximately 2.0 : 1.2 calculated on the CH<sub>2</sub> splitting peaks at 2.93 and 2.84 ppm of the proton NMR.*

<sup>1</sup>H NMR calculated separately for splitting peaks (400 MHz, DMSO-*d*<sub>6</sub>)  $\delta$  10.89 (s, 2H), 10.79 (s, 1H), 7.50 (t, *J* = 6.8 Hz, 3H), 7.40-7.26 (m, 9H), 7.23 (d, *J* = 8.4 Hz, 2H), 7.15 (d, *J* = 1.9 Hz, 2H), 7.12-6.91 (m, 11H), 6.90-6.82 (m, 3H), 6.82 – 6.62 (m, 6H), 6.03-5.94 (m, 6H), 4.57-4.46 (m, 6H), 3.59 – 3.43 (m, 10H), 2.93 (t, *J* = 7.2 Hz, 4H), 2.89 – 2.78 (m, 2H);

<sup>13</sup>C NMR calculated separately for splitting peaks (101 MHz, DMSO-*d*<sub>6</sub>)  $\delta$  170.1 and 170.0 (1C), 147.6 and 147.4 (1C), 146.5 and 146.3 (1C), 136.2 (1C), 135.1 and 135.0 (1C), 132.1, 131.3 and 131.2 (2C), 131.1 and 130.9 (1C), 128.1 and 127.9 (2C), 127.1 and 127.0 (1C), 123.4, 122.7, 121.2 and 121.1 (1C), 120.9 and 120.2 (1C), 118.5 and 118.3 (1C), 118.2 and 118.1 (1C), 111.5 and 111.4 (1C), 110.9, 108.3 and 108.1 (1C), 107.4, 101.0 and 100.9 (1C), 50.8 and 47.1 (1C), 47.5 and 46.4 (1C), 38.9 and 38.3 (1C), 23.8 and 23.0 (1C);

RP-HPLC Alltima™ C18 5  $\mu\text{m}$  150 mm x 4.6 mm, 10–100% B in 15 min, *R*<sub>t</sub> = 14.76 min, 100%;

LRMS m/z APCI (+) 446, 447 [M+H]<sup>+</sup> 100%; HRMS (ES<sup>+</sup>) calculated for C<sub>26</sub>H<sub>23</sub>ClN<sub>2</sub>O<sub>3</sub> 446.1397, fo 447.1467.

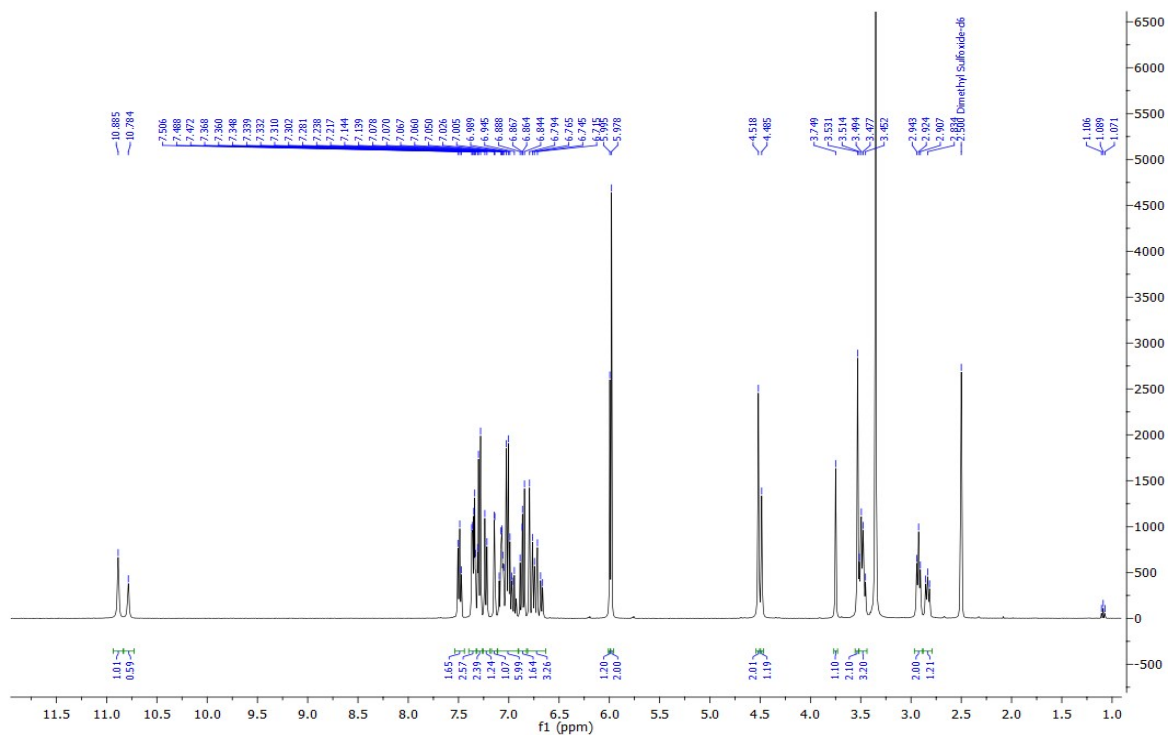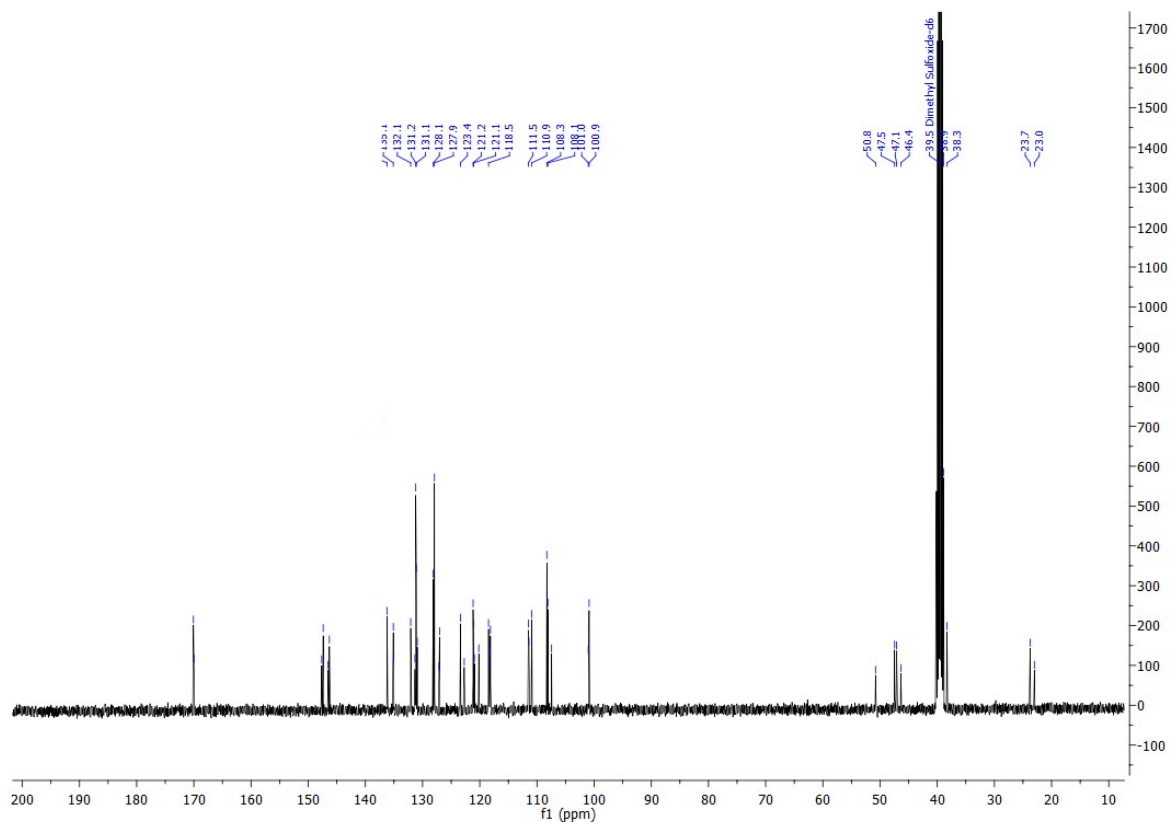

# Selective NOSEY at 5.99 ppm

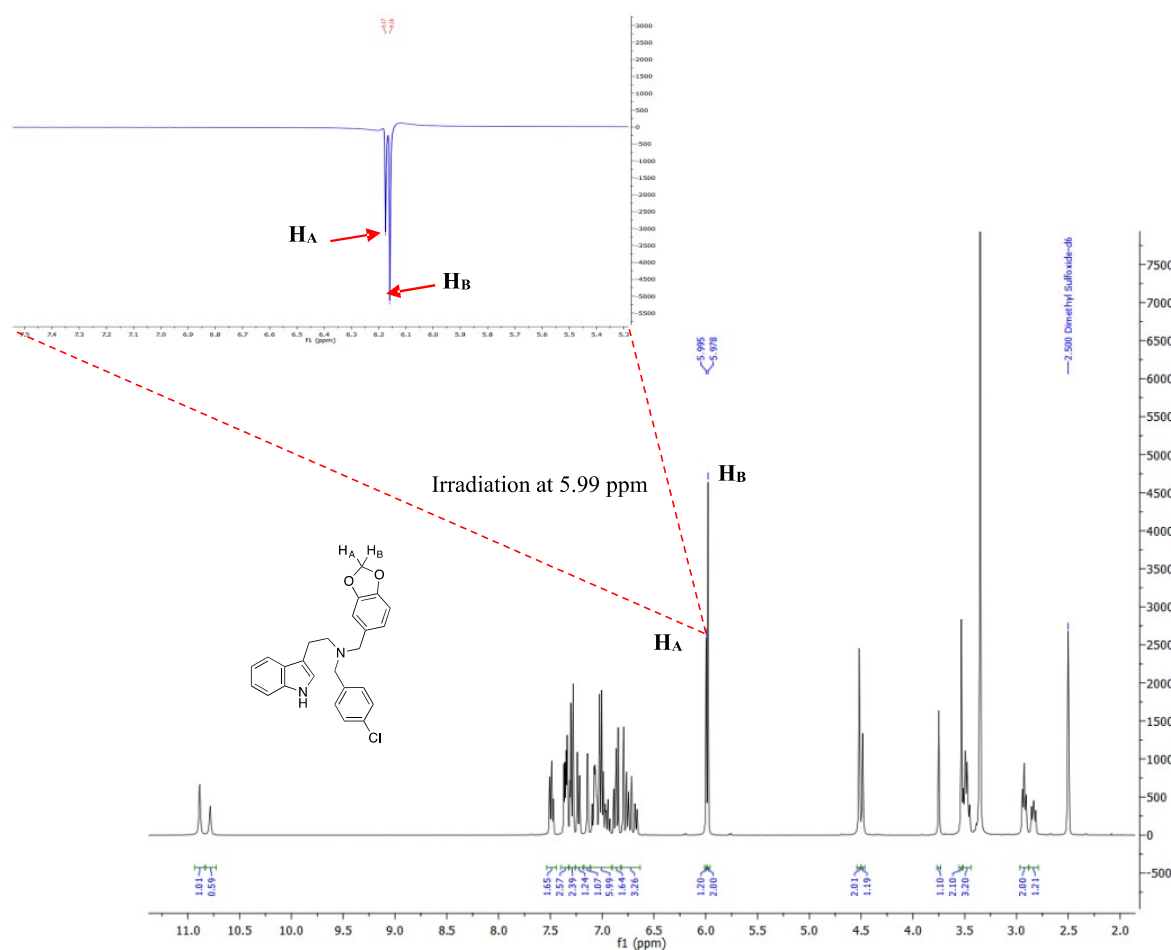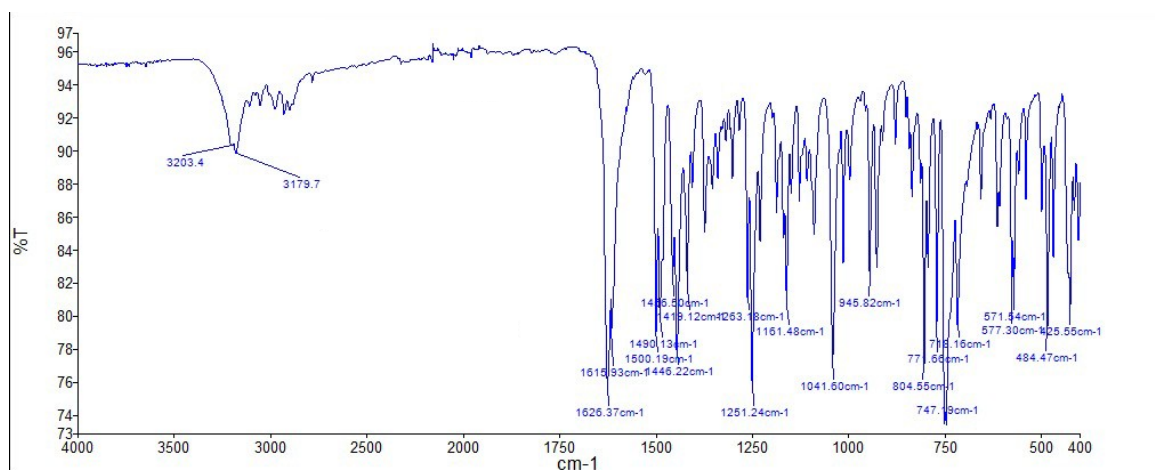

## *N*-Benzo[1,3]dioxol-5-ylmethyl-2,6-dichloro-*N*-[2-(1*H*-indol-3-yl)-ethyl]-benzamide (**24**)

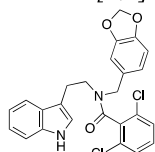

Yield: 100mg, 65%. MP 157-158 °C;

IR:  $\nu_{\text{max}}$ /cm<sup>-1</sup> 3280 (NH), 2937 (CH), 1626 (CON), 739 (CH- aromatics);

This is a mixture of atropoisomers of compound **24** with the ratio approximately 2.0 : calculated on the CH<sub>2</sub> splitting peaks at 5.99 and 6.02 ppm of the proton NMR.

<sup>1</sup>H NMR (400 MHz, DMSO-*d*<sub>6</sub>)  $\delta$  10.90 (s, 1H), 10.80 (s, 0.7H), 7.59–7.25 (m, 8.3H), 7.21 (d, 2.2 Hz, 1H), 7.10 (s, 0.3H), 7.07 (dd, *J* = 15.0, 8.0 Hz, 2H), 7.03–6.91 (m, 2.3H), 6.88 (d, *J* = 7.7 Hz, 1.7H), 6.8–6.75 (m, 2.7H), 6.02 (s, 1.3H), 5.99 (s, 2H), 4.61 (s, 1.3H), 4.53 (s, 2H), 4.04 (s, 1.3H), 3.87 (s, 2H), 3.65 (t, *J* = 7.2 Hz, 2H), 3.58–3.44 (m, 1.3H), 3.04 (t, *J* = 7.1 Hz, 2H), 2.97–2.80 (m, 1.3H);

$^{13}\text{C}$  NMR (101 MHz,  $\text{DMSO}-d_6$ )  $\delta$  168.2, 168.0, 148.1, 147.9, 147.0, 146.8, 136.8, 136.7, 135.9, 135.9, 133.6, 132.5, 131.8, 129.6, 129.5, 128.5, 128.4, 127.6, 127.5, 124.0, 123.2, 121.5, 121.4, 120.5, 118.9, 118.7, 118.5, 112.0, 111.8, 111.1, 108.9, 108.6, 107.8, 101.5, 101.4, 51.1, 47.9, 47.7, 47.5, 36.7, 35.9, 24.2, 23.6;

RP-HPLC Alltima™ C18 5  $\mu\text{m}$  150 mm x 4.6 mm, 10–100% B in 15 min,  $R_t$  = 18.81 min, 100%;

LRMS ( $\text{ESI}^+$ )  $m/z$  481, 481 $[\text{M}]^+$ , 100%. HRMS ( $\text{ESI}^+$ ) for  $\text{C}_{26}\text{H}_{22}\text{Cl}_2\text{N}_2\text{O}_3$ , calculated 480.1007, found 481.1080.

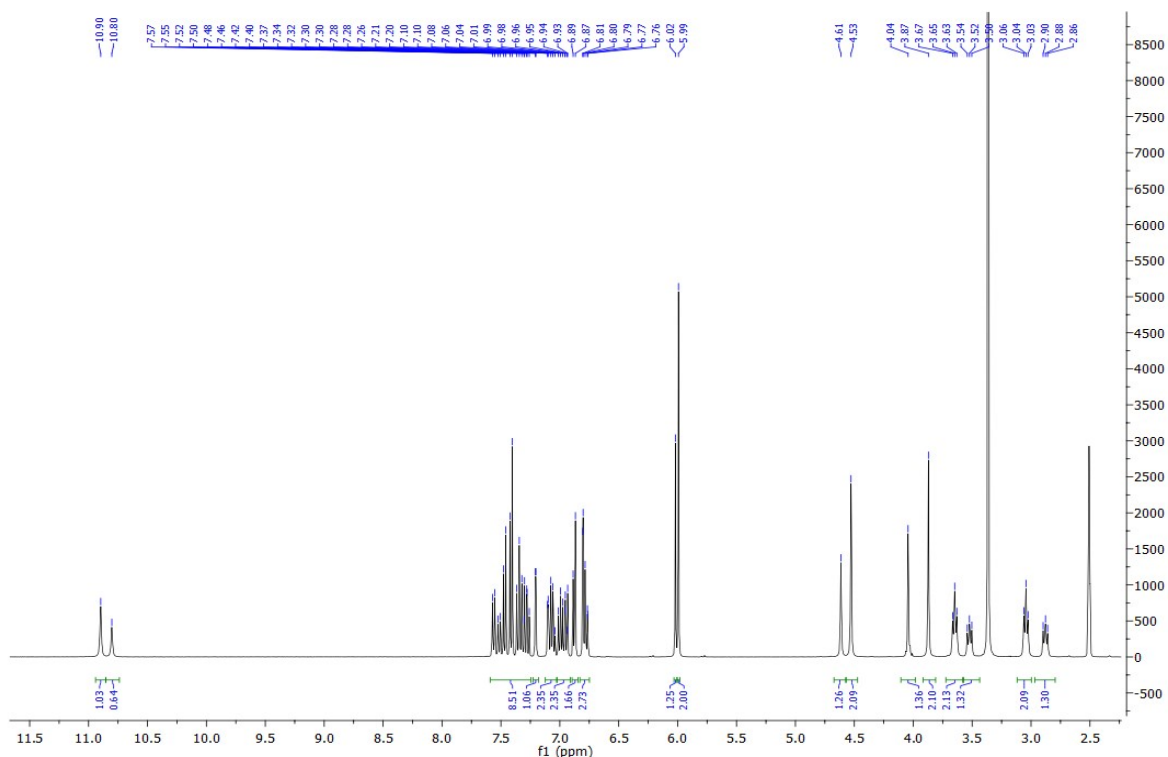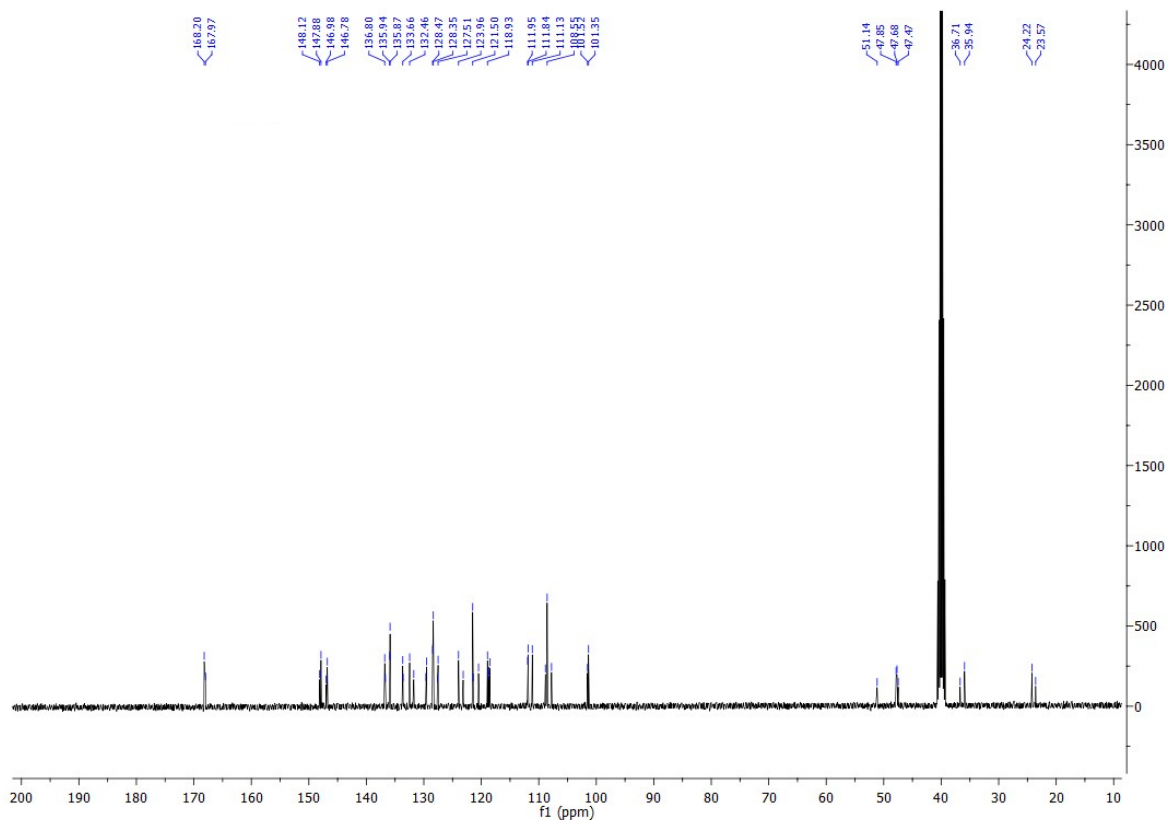

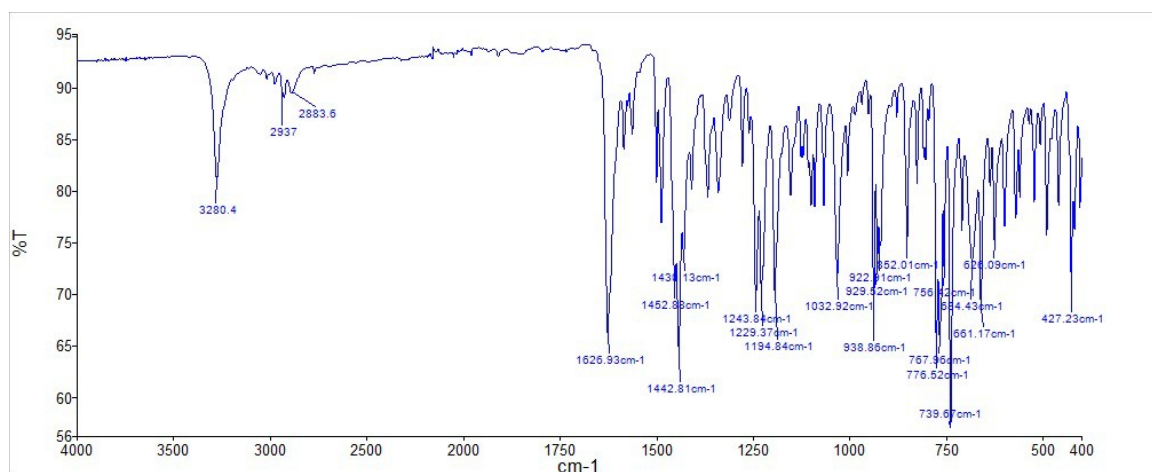

*N*-Benzo[1,3]dioxol-5-ylmethyl-4-benzoyl-*N*-[2-(1*H*-indol-3-yl)-ethyl]-benzamide (**25**)

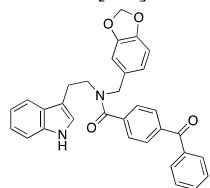

Yield: 77 mg, 40%. MP 181.2-181.7°C;

IR:  $\nu_{\text{max}}$ /cm<sup>-1</sup> 3191 (NH), 2990 (CH), 1643 (CON), 742 (CH-aromatic);

*This is a mixture of atropoisomers of compound 25 with the ratio approximately 2.0 : 0.9 calculated on the CH<sub>2</sub> splitting peaks at 4.75 and 6.02 ppm of the proton NMR.*

<sup>1</sup>H NMR (400 MHz, DMSO-*d*<sub>6</sub>)  $\delta$  10.83 (d, *J* = 10.1 Hz, 1.5H), 7.85 – 7.66 (m, 5.5H), 7.58 (dt, *J* = 18.2, 8.8 Hz, 6.5H), 7.41 – 7.17 (m, 4H), 7.11 – 6.85 (m, 7.5H), 6.84 – 6.56 (m, 2H), 6.01 (d, *J* = 13.2 Hz, 3H), 4.75 (s, 2H), 4.32 (s, 1H), 3.60 (d, *J* = 7.1 Hz, 1H), 3.36 – 3.30 (overlapped by water) (m, 2.5H), 3.03 (d, *J* = 7.1 Hz, 1H), 2.88 (t, *J* = 7.1 Hz, 2H);

<sup>13</sup>C NMR (101 MHz, DMSO-*d*<sub>6</sub>)  $\delta$  195.6, 170.6, 148.0, 146.9, 140.9, 137.4, 137.2, 136.6, 133.4, 132.0, 130.1, 130.0, 129.1, 127.4, 127.1, 126.8, 123.7, 121.8, 121.4, 118.7, 118.6, 118.1, 111.9, 110.8, 108.8, 108.7, 101.4, 52.4, 49.1, 46.9, 45.5, 24.2, 23.1;

RP-HPLC Alltima™ C18 5  $\mu$ m 150 mm x 4.6 mm, 10–100% B in 15 min, *R*<sub>t</sub> = 17.71 min, 100 %

LRMS (APCI+/-) *m/z* 502, 503 [M+1], 100%. HRMS (ES<sup>+</sup>) for C<sub>32</sub>H<sub>26</sub>N<sub>2</sub>O<sub>4</sub>, calculated 503.19653, found 503.19636.

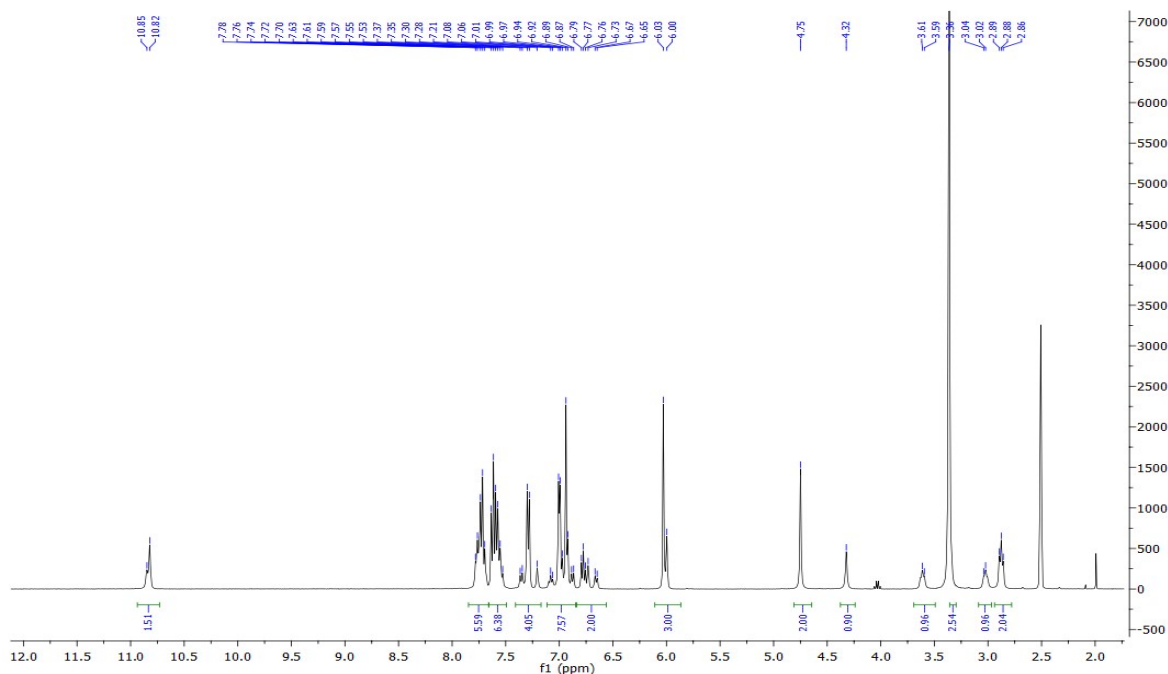

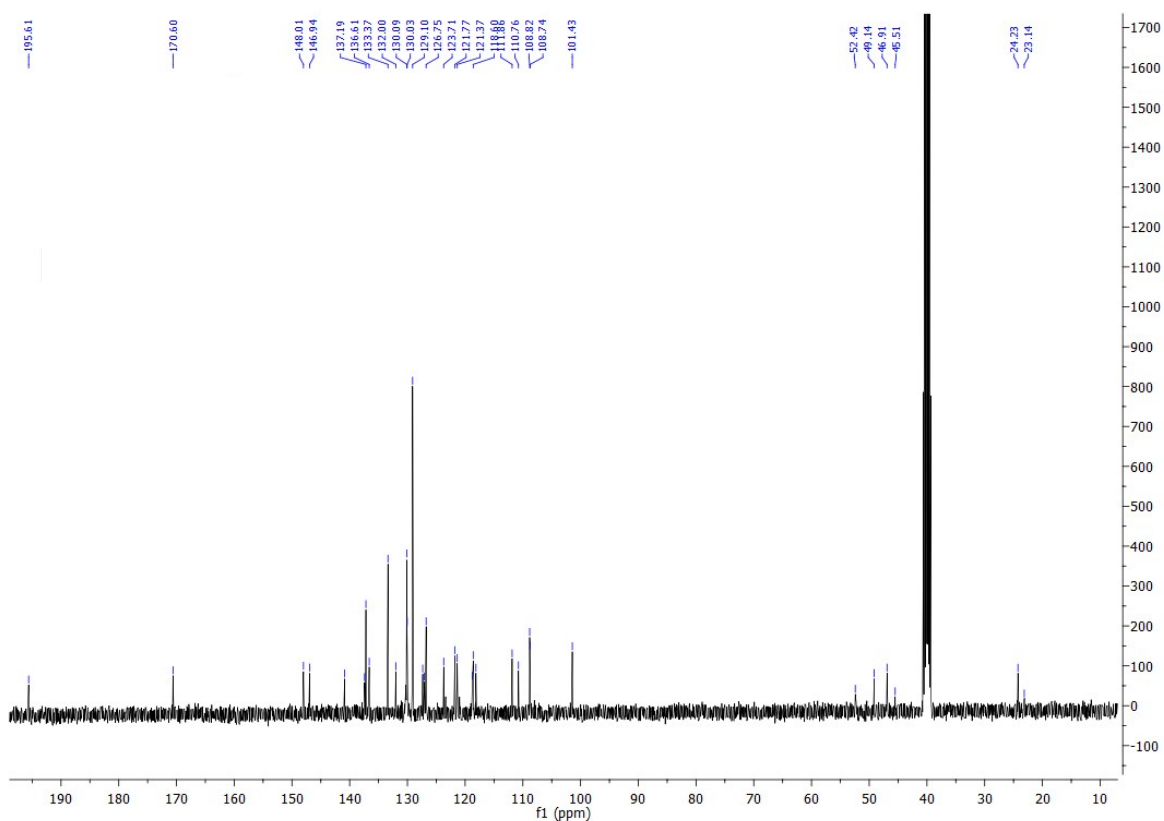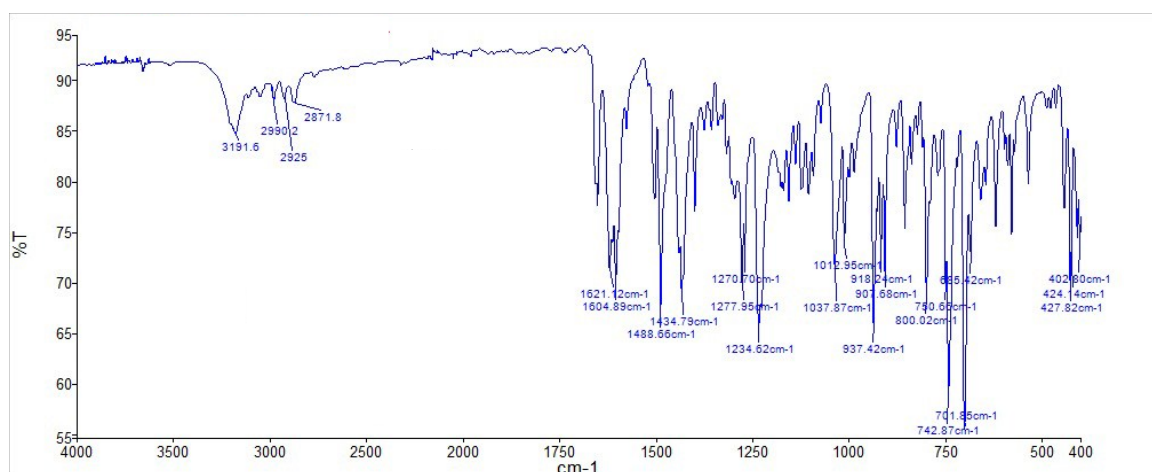

**5-Methylpyrazine-2-carboxylic acid benzo[1,3]dioxol-5-ylmethyl-[2-(1H-indol-3-yl)-ethyl]-amide (**26**)**

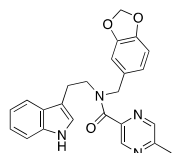

Yield: 47 mg, 22%. MP 132 –133 °C;

IR:  $\nu_{\text{max}}$ /cm<sup>-1</sup> 3316 (NH), 1632 (CON), 1632 (CON), 739 (CH-aromatic);

*This is a mixture of atropoisomers of compound **26** with the ratio approximately 2 : 1 calculated on the CH<sub>2</sub> splitting peaks at 4.71 and 4.46 ppm of the proton NMR. <sup>1</sup>H NMR is reported as displayed on spectra. All peaks in <sup>13</sup>C NMR are reported.*

<sup>1</sup>H NMR (400 MHz, DMSO-*d*<sub>6</sub>)  $\delta$  10.83 (s, 0.5H), 10.77 (s, 1H), 8.75 (d, *J* = 1.2 Hz, 0.5H), 8.56 (s, 0.5H), 8.34 (s, 1H), 8.19 (d, *J* = 1.3 Hz, 1H), 7.52 (d, *J* = 7.8 Hz, 0.5H), 7.34 (d, *J* = 8.1 Hz, 0.7H), 7.25 (d, *J* = 8.1 Hz, 1.2H), 7.16 (d, *J* = 2.0 Hz, 0.7H), 7.11 – 7.02 (m, 1.8H), 7.02 – 6.79 (m, 8H), 6.75 (d, *J* = 7.9 Hz, 0.5H), 6.01 (s, 2H), 5.99 (s, 0.8H), 4.71 (s, 2H), 4.46 (s, 1H), 3.60 (dt, *J* = 15.8, 7.5 Hz, 3.2H), 2.92 (dt, *J* = 13.8, 7.5 Hz, 3.2H), 2.54 (s, 1.8H), 2.41 (s, 3.2);

<sup>13</sup>C NMR (101 MHz, DMSO-*d*<sub>6</sub>)  $\delta$  167.2, 166.8, 155.0, 154.2, 147.9, 147.4, 147.1, 147.0, 146.9, 143.7, 143.2, 143.0, 142.0, 136.7, 136.6, 131.9, 131.3, 127.6, 127.1, 123.6, 123.3, 121.8, 121.6, 121.5, 121.3, 118.7, 118.5, 118.1, 111.9, 111.7, 110.9, 108.8, 108.7, 108.6, 108.5, 101.5, 101.4, 52.0, 48.6, 47.8, 46.192, 24.4, 23.1, 21.7, 21.5;

RP-HPLC Alltima™ C18 5  $\mu$ m 150 mm x 4.6 mm, 10–100% B in 15 min, Rt = 12.40 min, 100%;

LRMS (APCI±) m/z 414, 415 [M+H]<sup>+</sup>, 100%. HRMS (ES<sup>+</sup>) for C<sub>24</sub>H<sub>22</sub>N<sub>4</sub>O<sub>3</sub>, calculated 415.17647, found 415.17611.

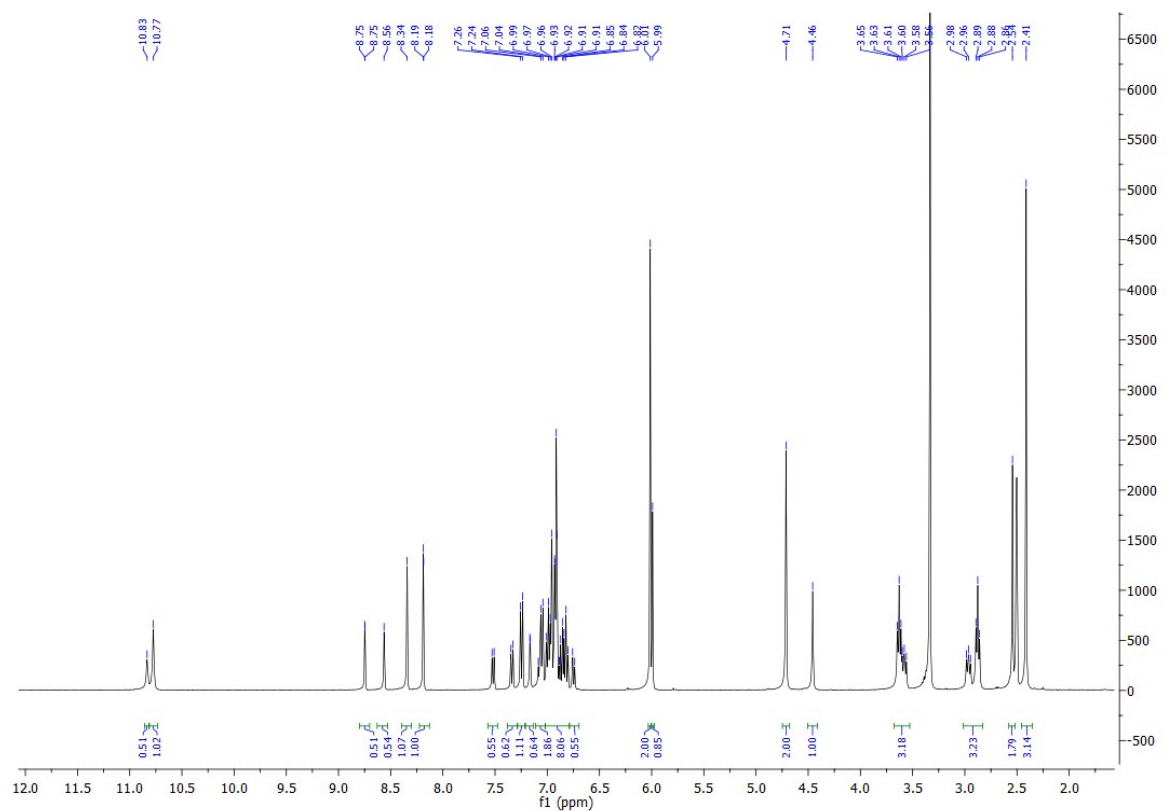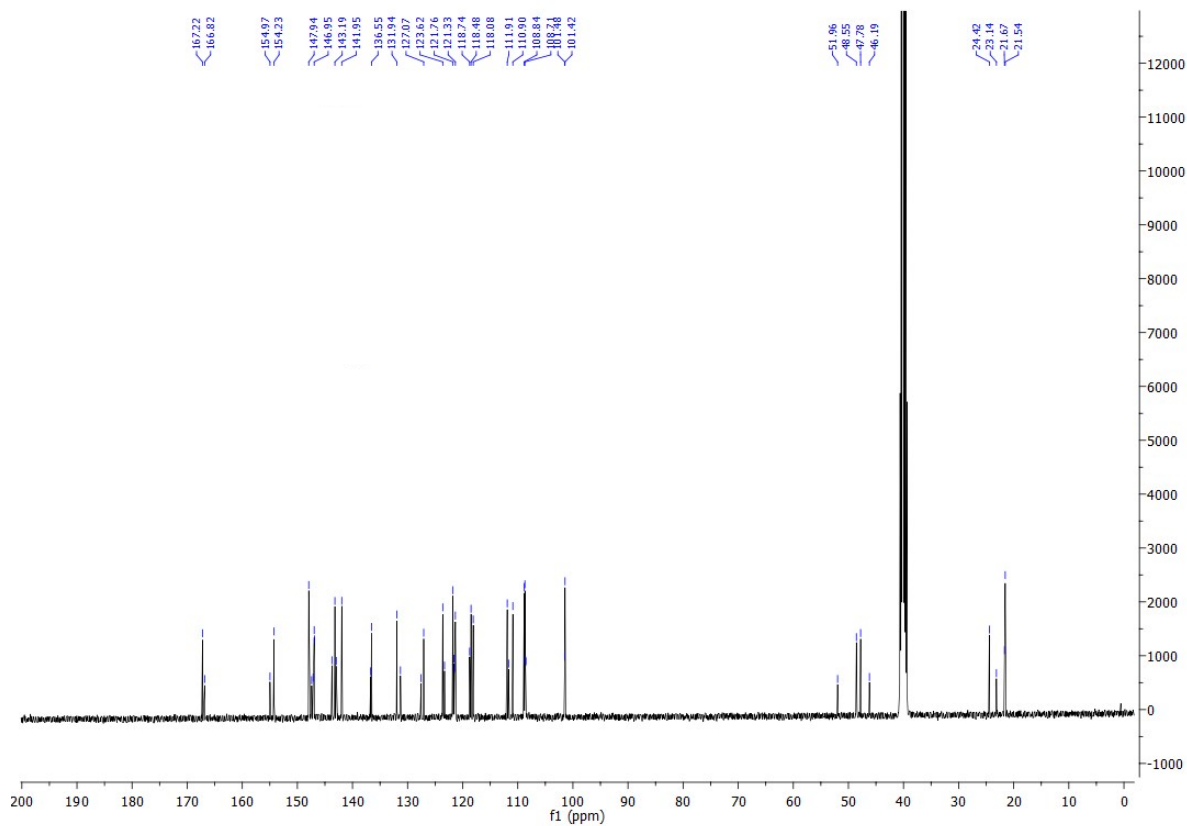

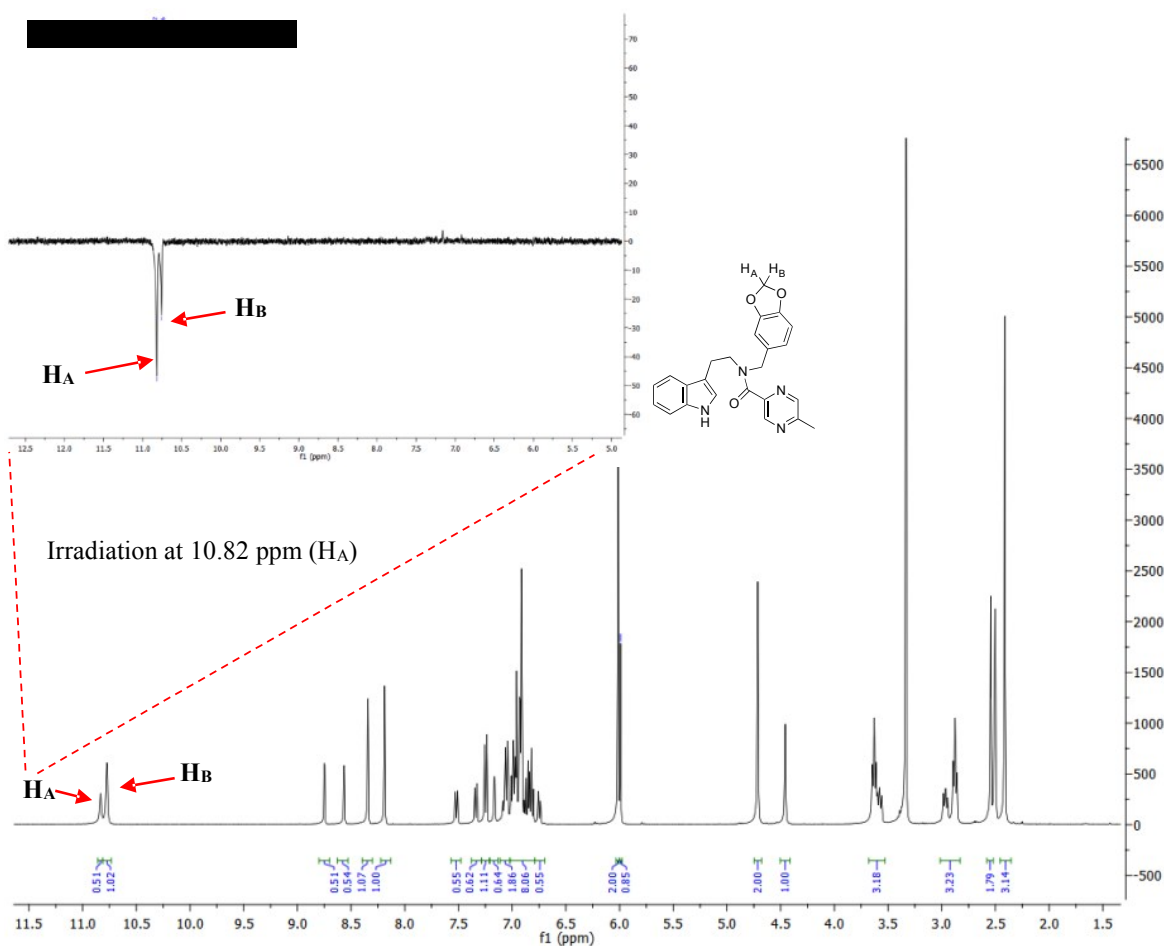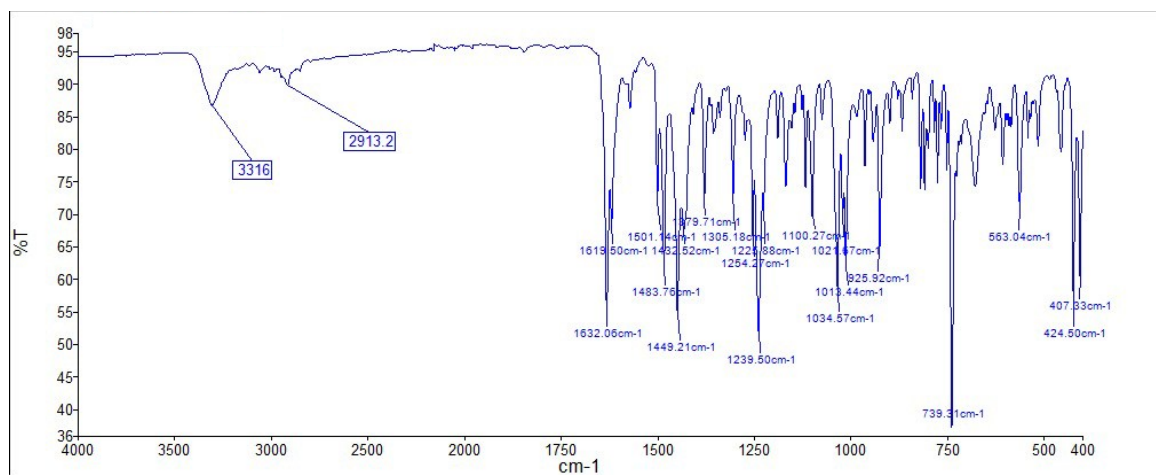

**5-Methoxy-1H-indole-2-carboxylic acid benzo[1,3]dioxol-5-ylmethyl-[2-(1H-indol-3-yl)-ethyl]-amide (27)**

Yield: 149 mg, 62%. MP 202–202.5 °C;

IR:  $\nu_{\text{max}}/\text{cm}^{-1}$  3439 (NH), 3258 (NH), 1612 (CON), 1450 (C-C ring), 738 (C-H ring);

$^1\text{H}$  NMR (400 MHz,  $\text{DMSO}-d_6$ )  $\delta$  11.57 (s, 1H), 10.86 (s, 1H), 7.68–7.26 (m, 3H), 7.19 (s, 1H), 7.13–6.48 (m, 8H), 6.01 (s, 2H), 4.81 (s, 2H), 3.73 (s, 5H), 3.08 (s, 2H);

$^{13}\text{C}$  NMR (101 MHz,  $\text{DMSO}-d_6$ )  $\delta$  163.6, 154.2, 148.1, 146.9, 136.7, 132.0, 131.6, 131.5, 127.8, 127.6, 123.3, 121.5 (Cx2), 118.8 (Cx2), 115.0, 113.4, 111.9, 108.8, 103.5 (Cx2), 102.4, 101.5, 65.4, 55.7, 48.5, 48.1, 23.6;

RP-HPLC Alltima™ C18 5  $\mu\text{m}$  150 mm x 4.6 mm, 10–100% B in 15 min,  $R_t$  = 6.92 min, 100%;

LRMS ( $\text{ESI}^+$ )  $m/z$  467, 467  $[\text{M}]^+$ , 100%; HRMS ( $\text{ES}^+$ ) for  $\text{C}_{28}\text{H}_{25}\text{N}_3\text{O}_4$ , calculated 468.19178, found 468.19186.

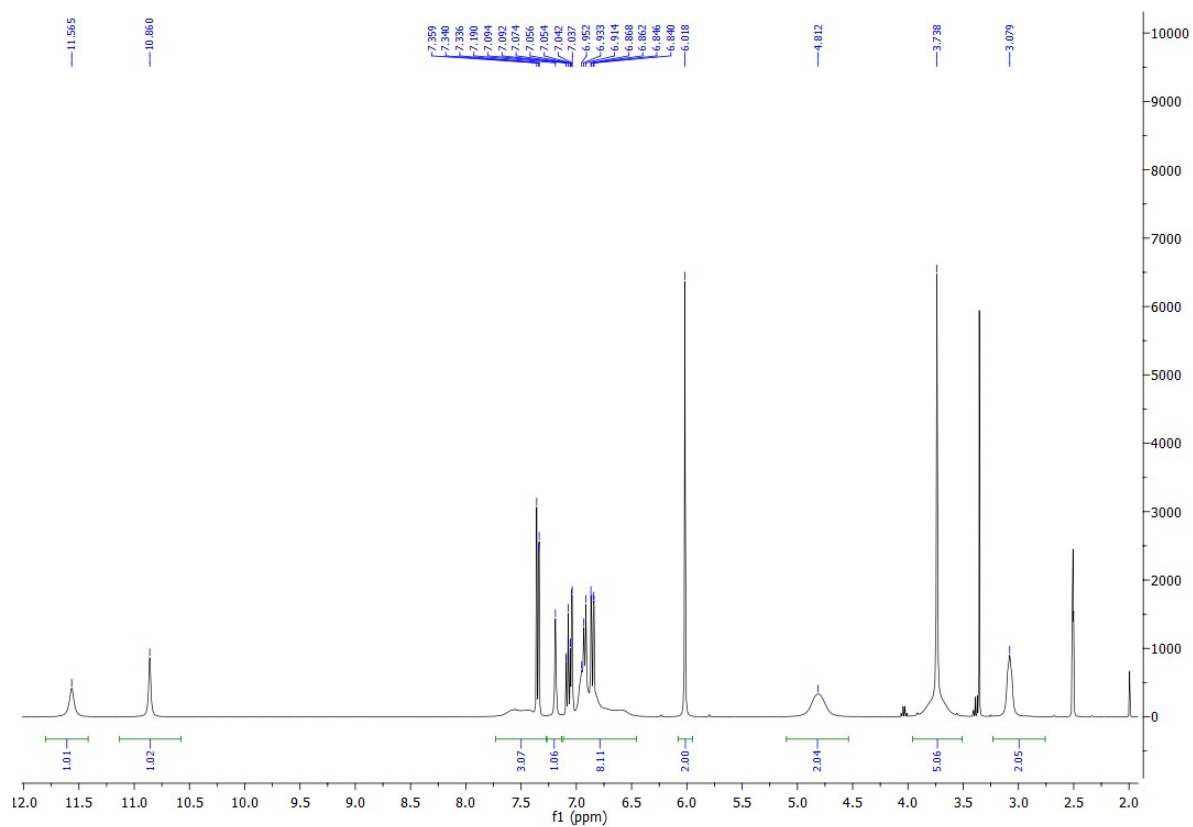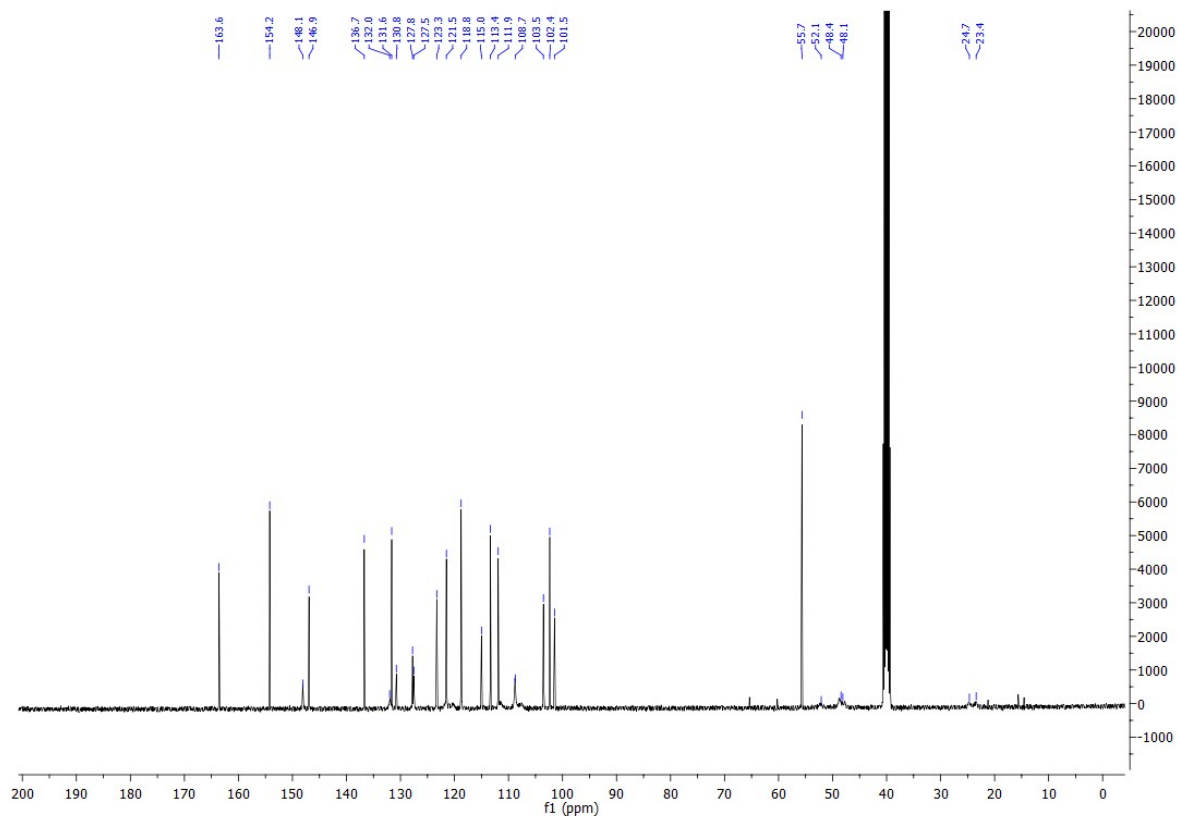

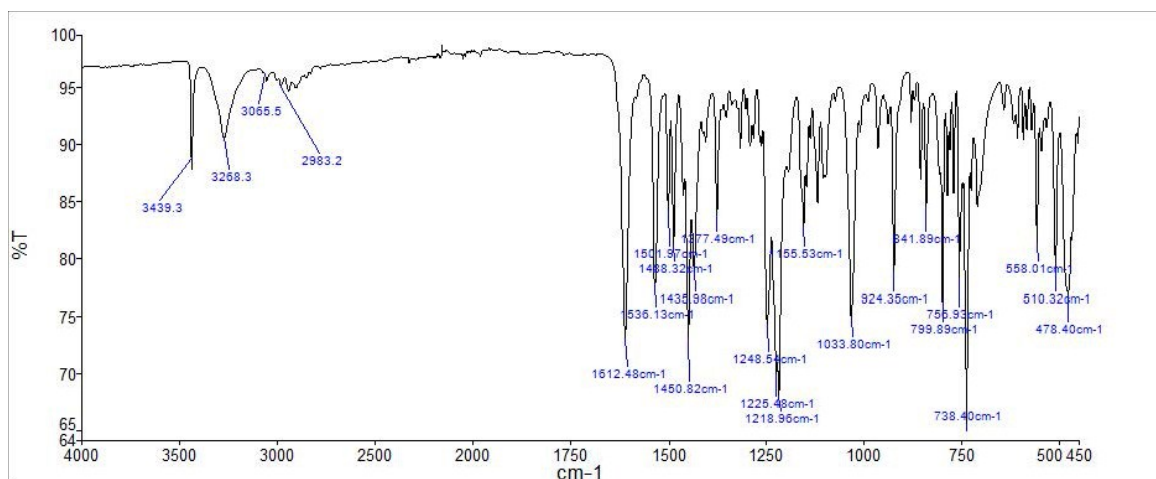

**5-Chloro-1H-indole-2-carboxylic acid benzo[1,3]dioxol-5-ylmethyl-[2-(1H-indol-3-yl)-ethyl]-amide (**28**)**

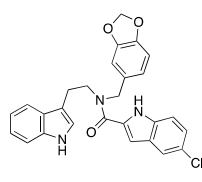

Yield: 170 mg, 64%. MP 194 –194.5 °C;

IR:  $\nu_{\max}/\text{cm}^{-1}$  3433 (NH), 3265(NH), 1612 (CON), 739 (CH-aromatics);

$^1\text{H}$  NMR (400 MHz,  $\text{DMSO}-d_6$ )  $\delta$  11.93 (s, 1H), 10.87 (s, 1H), 7.73 – 7.26 (m, 4H), 7.25 – 7.13 (m, 2H), 7.08 (t,  $J = 7.5$  Hz, 1H), 7.02 – 6.60 (m, 5H), 6.02 (s, 2H), 4.79 (br.s, 2H), 3.74 (br.s, 2H), 3.08 (s, 2H);

$^{13}\text{C}$  NMR (101 MHz,  $\text{DMSO}-d_6$ )  $\delta$  163.4, 148.1, 147.0, 136.7, 134.8, 132.1, 128.5, 127.5, 124.7, 123.9 (Cx2), 123.4, 121.5, 121.4, 121.0, 118.8 (Cx2), 118.7, 114.1, 111.9, 108.8, 103.2 (Cx2), 101.5, 52.4, 48.9, 48.6, 47.6, 24.7, 23.4; \*Note: 52.38 and 48.59 are the splitting of 1 C ( $\text{Ar}-\text{CH}_2-\text{N}$ ); 48.91 and 47.58 are the splitting of ( $\text{CH}_2-\text{CH}_2-\text{N}$ ), and 24.68, 23.41 are the splitting of ( $\text{CH}_2-\text{CH}_2-\text{N}$ ).

UPLC: Mobile phase A= 100%  $\text{H}_2\text{O}$  with 0.1% formic acid; Mobile phase B = 90% ACN : 10%  $\text{H}_2\text{O}$  and 0.1% formic acid. RP-HPLC Agilent Zorbax SB-C18 1.8  $\mu\text{m}$ , 50 mm x 2.1 mm, isocratic 80% mobile phase B at 0.6 mL/min in 8 minutes,  $R_t = 5.05$  min, 100%;

LRMS (ESI $^+$ )  $m/z$  471, 470  $[\text{M}-\text{H}]^+$ , 100%;  $m/z$  471, 472  $[\text{M}+\text{H}]^+$ , 100%. HRMS (ES $^+$ ) for  $\text{C}_{27}\text{H}_{22}\text{ClN}_3\text{O}_3$ , calculated 472.1423, found 472.1422.

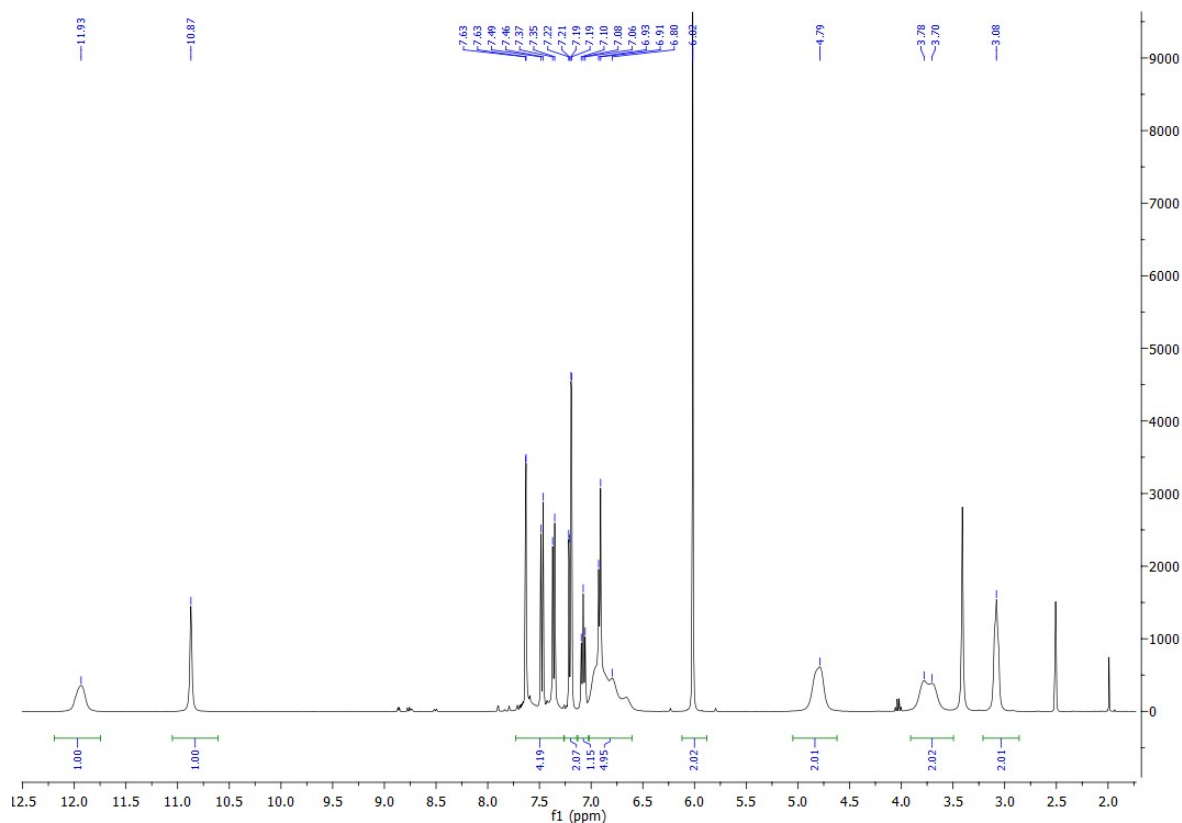

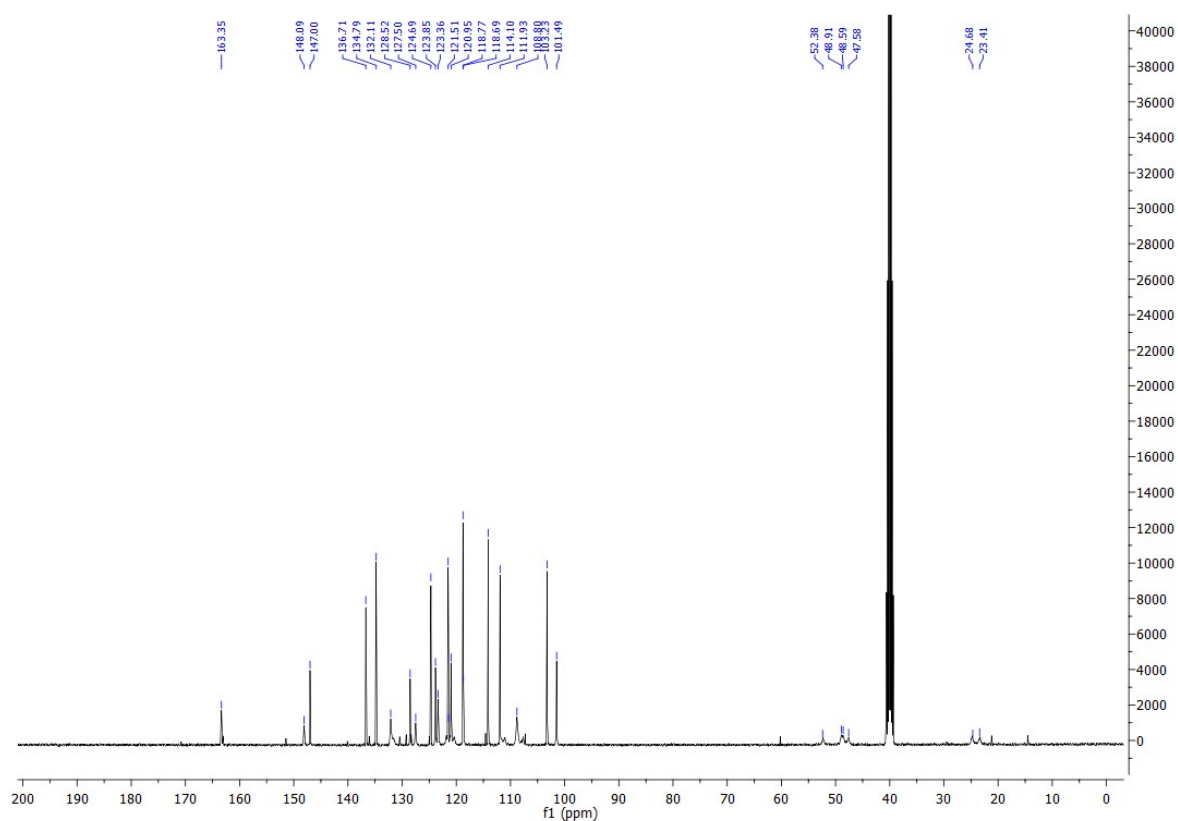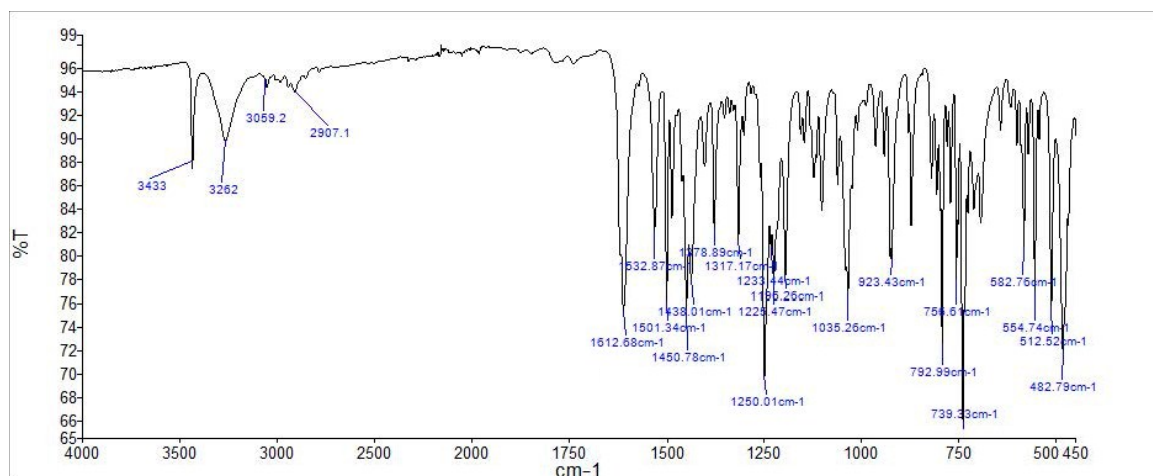

(2-(1H-indol-3-yl)ethyl)-N-(benzo[d][1,3]dioxol-5-ylmethyl)-1H-indole-5-carboxamide (**29**)

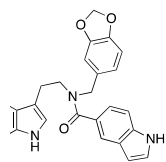

Yield: 158 mg, 67%. MP 162.5-163 °C;

IR:  $\nu_{\text{max}}/\text{cm}^{-1}$  3638 (NH), 3227 (NH), 1614(CON), 740 (CH-aromatic);

$^1\text{H}$  NMR (400 MHz,  $\text{DMSO}-d_6$ )  $\delta$  11.29 (s, 1H), 10.78 (s, 1H), 7.61 (s, 1H), 7.51 – 7.39 (2H), 7.56 – 6.38 (m, 9H), 6.47 (s, 1H), 6.01 (s, 2H), 4.87 – 4.29 (m, 2H), 3.65 – 3.45 (m, 2H), 3 – 2.70 (m, 2H);

$^{13}\text{C}$  NMR (101 MHz,  $\text{DMSO}-d_6$ )  $\delta$  186.0, 172.8, 148.0, 146.9, 136.6, 136.5, 127.8, 127.5, 127.0, 123.3, 120.4, 119.1, 118.6, 111.8, 111.7, 108.7, 102.2, 101.4, 49.1, 47.3, 45.6, 24.6, 23.4; \*Note : Signs of atropoisomers phatic  $\text{CH}_2$ , in which 47.3 is the splitting of 1 C ( $\text{Ar}-\underline{\text{CH}_2}-\text{N}$ ); 49.1 and 45.6 are the splitting of ( $\text{CH}_2-\underline{\text{CH}_2}-\text{N}$ ); 2 and 23.4 are the splitting of ( $\underline{\text{CH}_2}-\text{CH}_2-\text{N}$ );

RP-HPLC Alltima™ C18 5  $\mu\text{m}$  150 mm x 4.6 mm, 10–100% B in 15 min,  $R_t$  = 6.48 min, 96%

LRMS (ESI+)  $m/z$  437, 437  $[\text{M}]^+$ , 70%. HRMS (ES+) for  $\text{C}_{27}\text{H}_{23}\text{N}_3\text{O}_3$ , calculated 438.18122, found 438.18122.

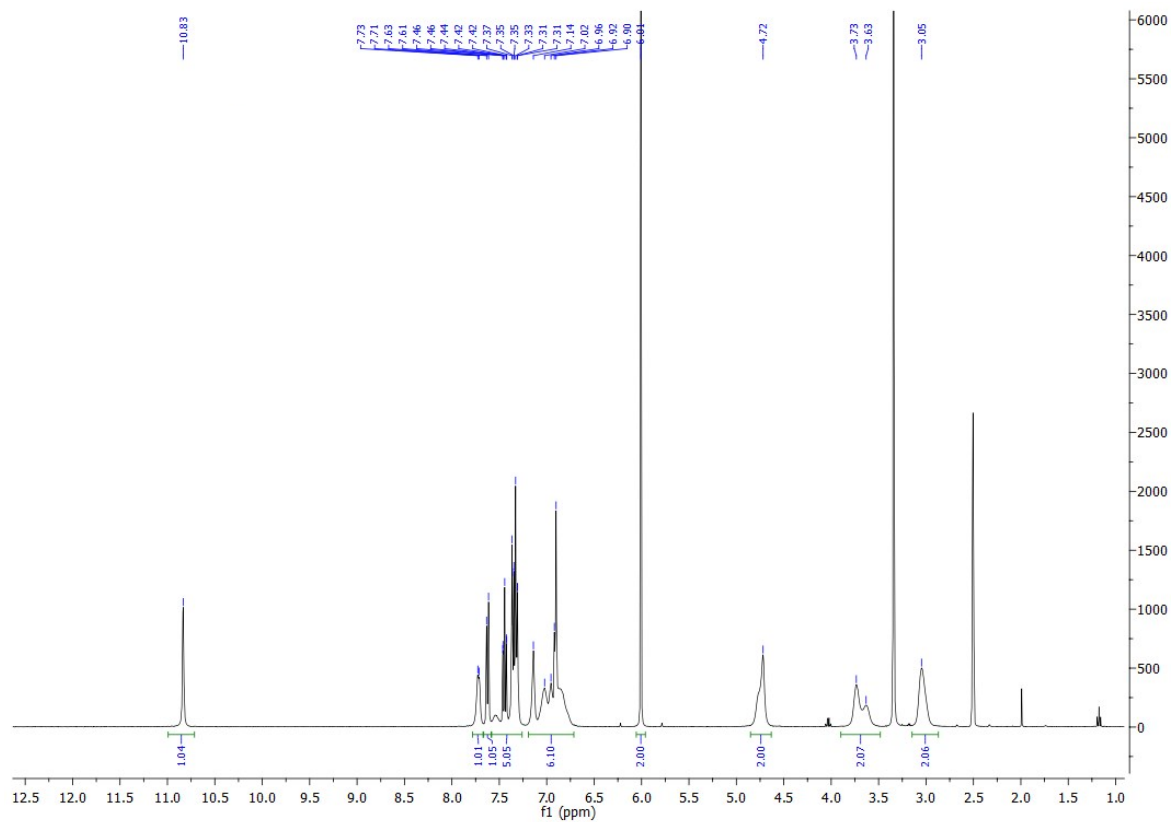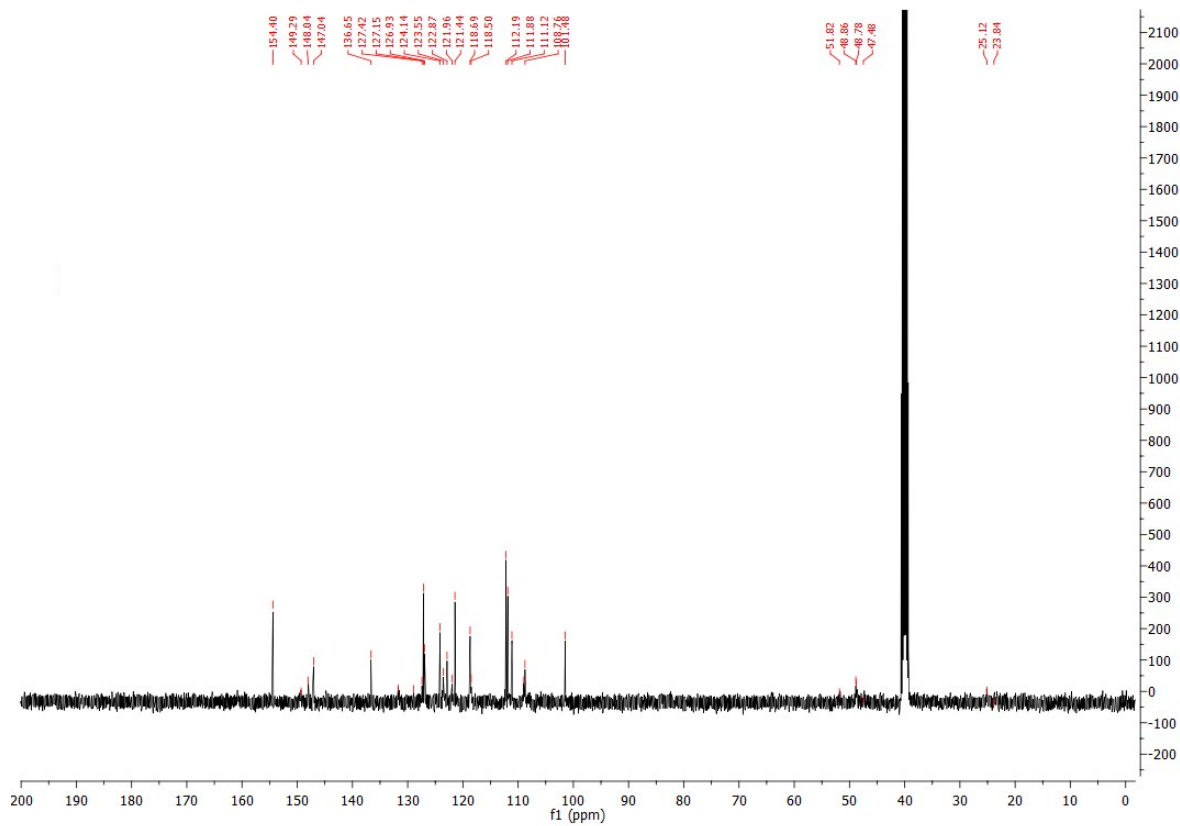

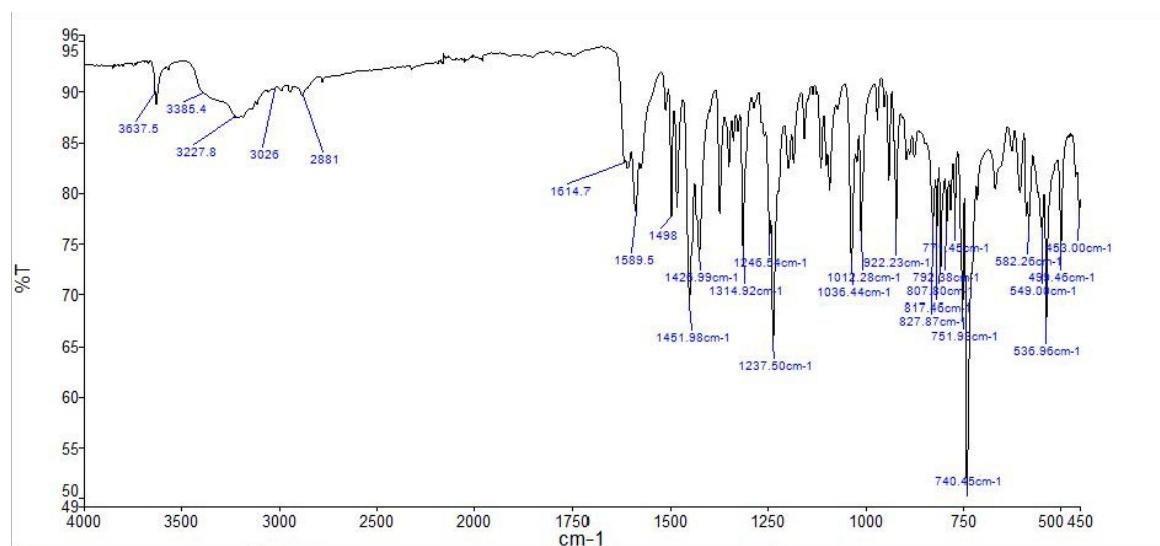

Supplement: c6ob01959e1.pdf [file c6ob01959e1.pdf]
